# Supplementary material for: Combined experimental and theoretical studies of regio- and stereoselectivity in reactions of β-isoxazolyl- and β-imidazolyl enamines with nitrile oxides
Source: publisher site journal article supplement (doi:10.3762/bjoc.12.233), 2016-11-15

**Supporting Information**  
**for**  
**Combined experimental and theoretical studies of**  
**regio- and stereoselectivity in reactions of  $\beta$ -**  
**isoxazolyl- and  $\beta$ -imidazolyl enamines with nitrile**  
**oxides**

Ilya V. Efimov<sup>1</sup>, Marsel Z. Shafikov<sup>1,2</sup>, Nikolai A. Beliaev<sup>1</sup>, Natalia N. Volkova<sup>1</sup>, Tetyana V. Beryozkina<sup>1</sup>, Wim Dehaen<sup>3</sup>, Zhijin Fan<sup>\*4</sup>, Viktoria V. Grishko<sup>5</sup>, Gert Lubec<sup>6</sup>, Pavel A. Slepukhin<sup>1,7</sup> and Vasiliy A. Bakulev<sup>\*1</sup>

Address: <sup>1</sup>TOS Department, Ural Federal University named after the first President of Russia B.N. Yeltsin, 19 Mira str., 620002 Yekaterinburg, Russia, <sup>2</sup>Chemistry Department, University of York, Heslington, York, YO10 5DD (UK), <sup>3</sup>Molecular Design and Synthesis, Department of Chemistry, KU Leuven, Celestijnenlaan 200F, 3001 Leuven, Belgium, <sup>4</sup>State Key Laboratory of Elemento-Organic Chemistry Nankai University, Collaborative Innovation Center of Chemical Science and Engineering 300071 Tianjin, China, <sup>5</sup>Laboratory of Biologically Active Compounds, Institute of Technical Chemistry Ural Branch of Russian Academy of Sciences, 3 Academician Korolev str., Perm, Russia, <sup>6</sup>Medical University of Vienna, Department of Pediatrics, 14 Lazarettgasse, 1090 Vienna, Austria and <sup>7</sup>I. Ya. Postovsky Institute of Organic Synthesis, Ural Branch of Russian Academy of Sciences, 20 S. Kovalevskaya str., 620990 Yekaterinburg, Russia

Email: Vasiliy A. Bakulev - v.a.bakulev@urfu.ru; Zhijin Fan - fanj@nankai.edu.cn

\*Corresponding author

**NMR spectra of compounds 3a–c, 4a–p and X-ray study of isoxazoles 4a,o,p**

**Contents**

|                         |    |
|-------------------------|----|
| X-ray diffraction study | S2 |
| NMR spectra             | S4 |

## X-ray diffraction study

X-ray analyses were accomplished on an Xcalibur 3 diffractometer using the standard procedure (graphite-monochromated MoK $\alpha$ -irradiation,  $\omega$ -scanning with step 1 $\sigma$ ,  $T = 150.00(10)$  K) (**4o,p**) or 295(2) K (**4a**).

**4a.** C<sub>13</sub>H<sub>10</sub>N<sub>4</sub>O<sub>3</sub>,  $M = 270.25$ , orthorhombic,  $a = 6.5164(4)$  Å,  $b = 10.4597(4)$  Å,  $c = 17.7719(8)$  Å,  $V = 1211.33(10)$  Å<sup>3</sup>, space group P2<sub>1</sub>2<sub>1</sub>2<sub>1</sub> (no. 19),  $Z = 4$ ,  $\mu(\text{Mo K}\alpha) = 0.109$  mm<sup>-1</sup>,  $D_{\text{calc}} = 1.4818$  g/cm<sup>3</sup>, 4294 reflections measured ( $4.52^\circ \leq 2\theta \leq 61.22^\circ$ ), 3018 unique ( $R_{\text{int}} = 0.0169$ ,  $R_{\text{sigma}} = 0.0324$ ) which were used in all calculations. The final  $R_1$  was  $R_1 = 0.0440$ ,  $wR_2 = 0.1032$  ( $I \geq 2\sigma(I)$ ) and  $R_1 = 0.0565$ ,  $wR_2 = 0.1112$  (all data). Goodness-of-fit on  $F^2$  1.055, largest diff. peak/hole 0.17/-0.25 eÅ<sup>-3</sup>.

**4o.** C<sub>20</sub>H<sub>15</sub>N<sub>3</sub>O<sub>4</sub>,  $M = 361.35$ , monoclinic,  $a = 8.9292(3)$  Å,  $b = 12.2608(4)$  Å,  $c = 15.9631(6)$  Å,  $\beta = 101.183(3)^\circ$ ,  $V = 1714.45(10)$  Å<sup>3</sup>,  $T = 150.00(10)$ , space group P2<sub>1</sub>/c (no. 14),  $Z = 4$ ,  $\mu(\text{MoK}\alpha) = 0.100$  mm<sup>-1</sup>, 8807 reflections measured, 4683 unique ( $R_{\text{int}} = 0.0263$ ) which were used in all calculations. The final  $wR_2$  was 0.1333 (all data) and  $R_1$  was 0.0453 ( $I > 2\sigma(I)$ ).

**4p.** C<sub>21</sub>H<sub>16</sub>N<sub>2</sub>O<sub>4</sub>,  $M = 360.36$ , monoclinic,  $a = 8.9596(4)$  Å,  $b = 12.5516(3)$  Å,  $c = 15.7754(4)$  Å,  $\beta = 100.144(3)^\circ$ ,  $V = 1746.33(10)$  Å<sup>3</sup>,  $T = 150.00(10)$ , space group P2<sub>1</sub>/c (no. 14),  $Z = 4$ ,  $\mu(\text{MoK}\alpha) = 0.096$  mm<sup>-1</sup>, 8512 reflections measured, 4626 unique ( $R_{\text{int}} = 0.0208$ ) which were used in all calculations. The final  $wR_2$  was 0.1379 (all data) and  $R_1$  was 0.0438 ( $I > 2\sigma(I)$ ).

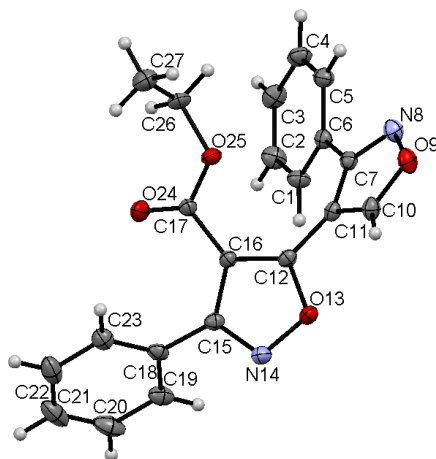

**NMR Spectra of isoxazoles 4a–p description.** The <sup>1</sup>H and <sup>13</sup>C NMR spectra for products **4a–p** demonstrate that all of the compounds belong to the same structural type. The <sup>1</sup>H NMR spectra of isoxazoles **4a–p** contain signals of C<sup>5</sup>–H of isoxazole ring in the range of 9.42–9.85 ppm apart from 3-cyclohexyl isoxazoles **4e,h,m** and 2,6-dihalophenylisoxazoles **4d,g,l** which are out of this range and exhibit those signals at 9.19 and 10.04–10.32 ppm, respectively. <sup>13</sup>C NMR spectra of **4a–p** show the signals of the carbon atoms at the 3-, 4- and 5-positions of the new isoxazole ring at 159.4–161.4 ppm, 105.8–110.5 and 161.2–165.5 ppm, respectively. 2D NMR spectra show direct coupling of C<sup>5</sup> with H, that could be diagnostic for 3,4-disubstituted

isoxazoles **4a-p**. For the alternative 3,5-disubstituted isoxazoles **5** we would have expected to observe the direct coupling of H with the C<sup>4</sup>-H carbon. One can conclude that, 3,4- and 3,5-disubstituted isoxazoles could be easily distinguished by NMR spectroscopy due to the structural features.

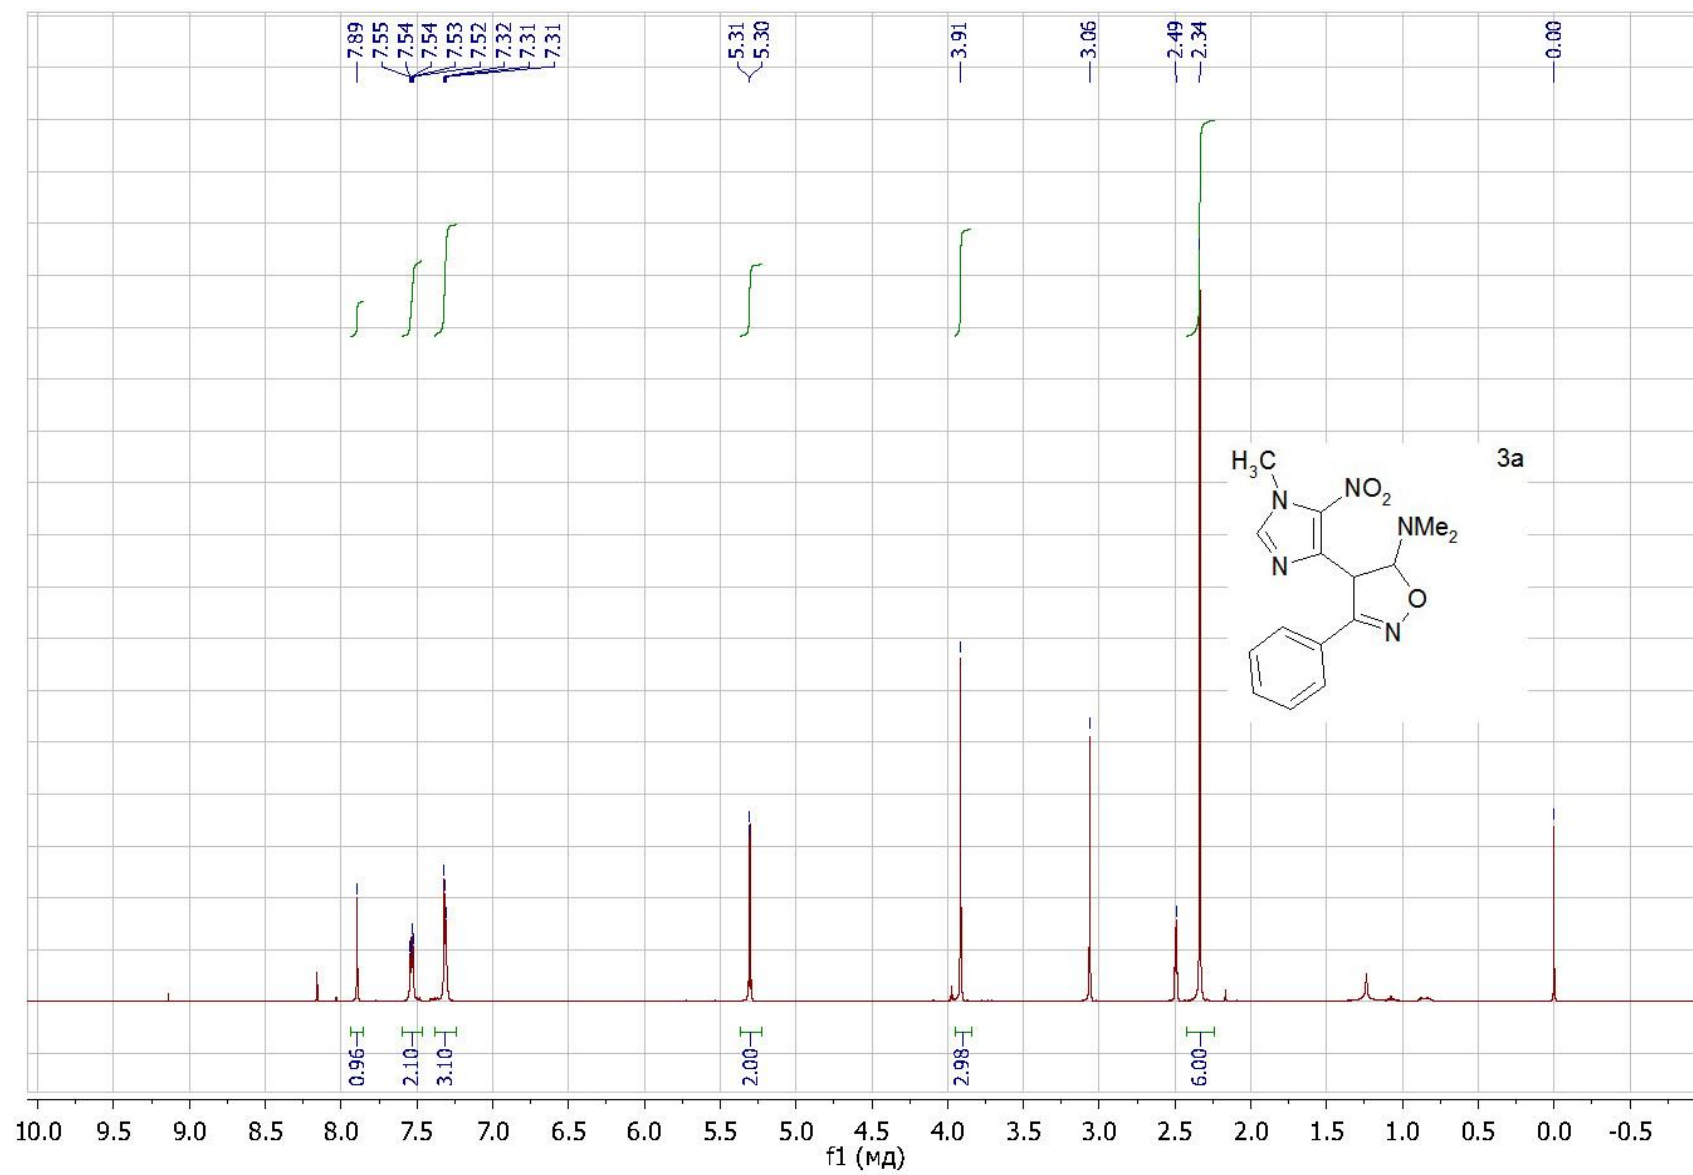

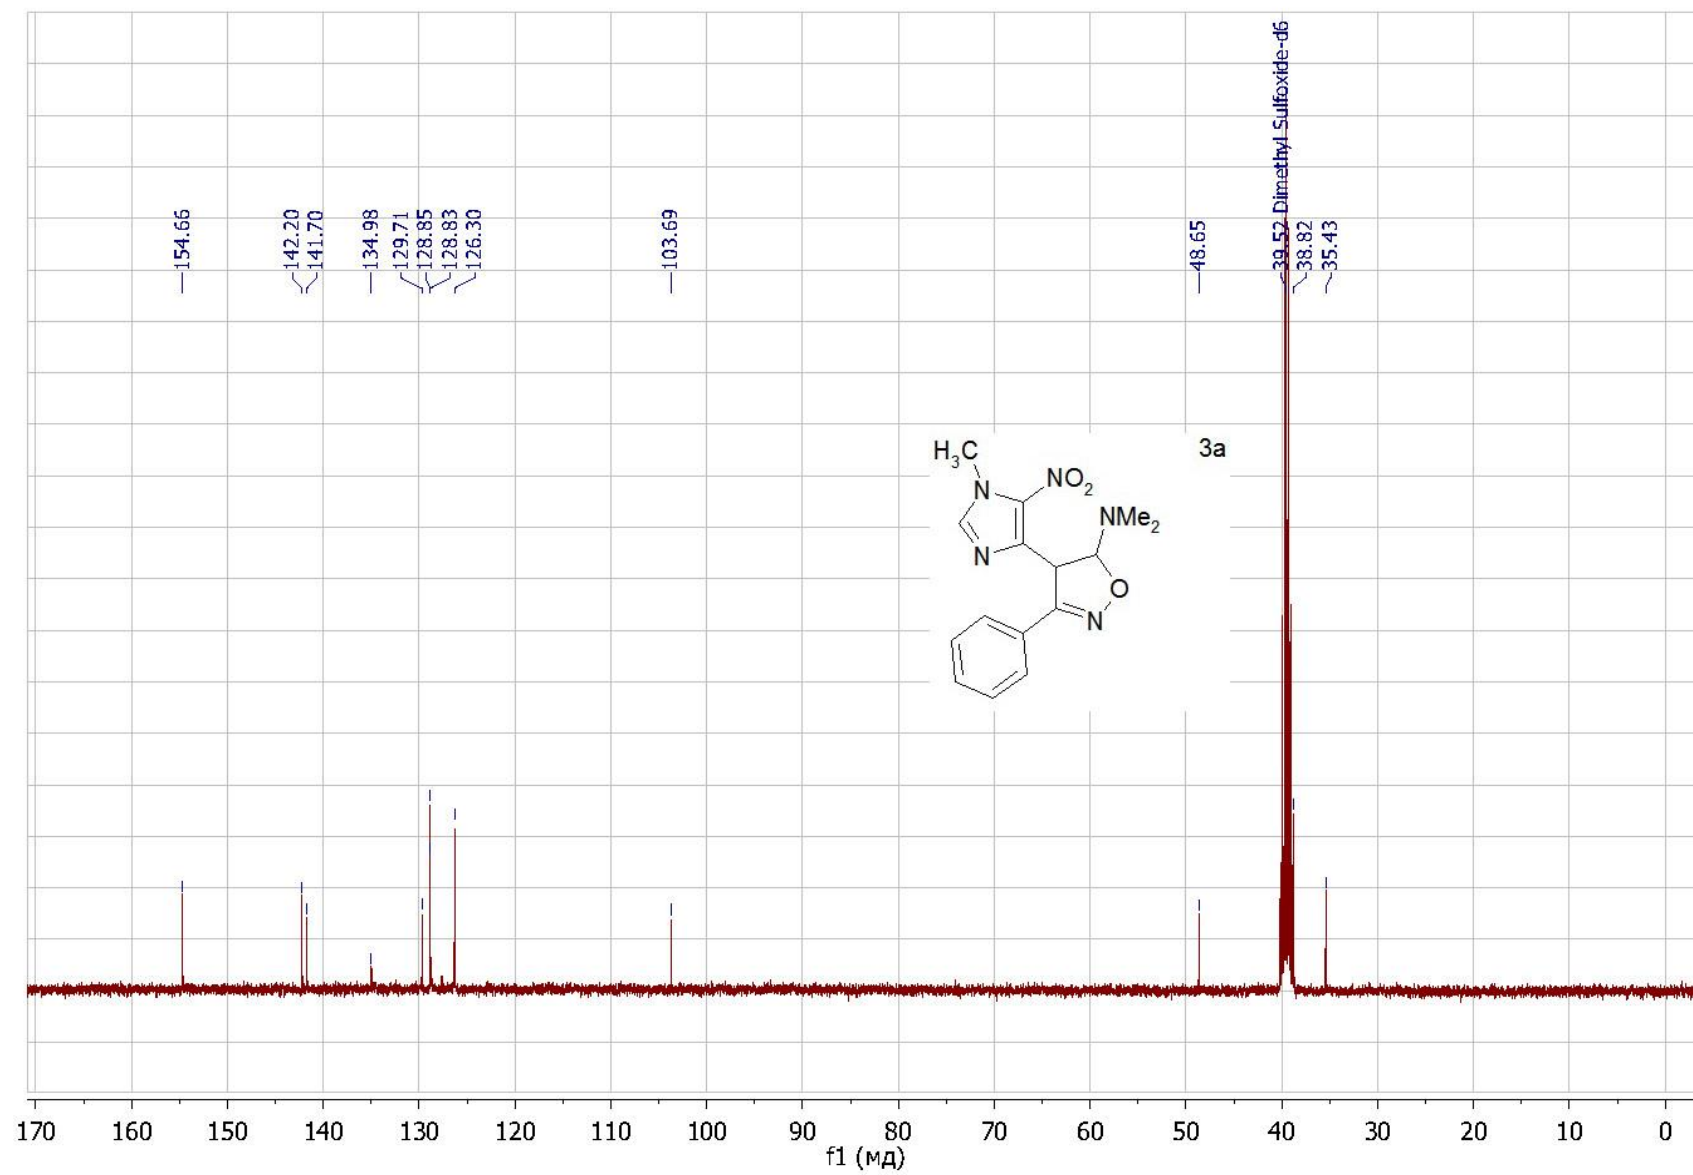

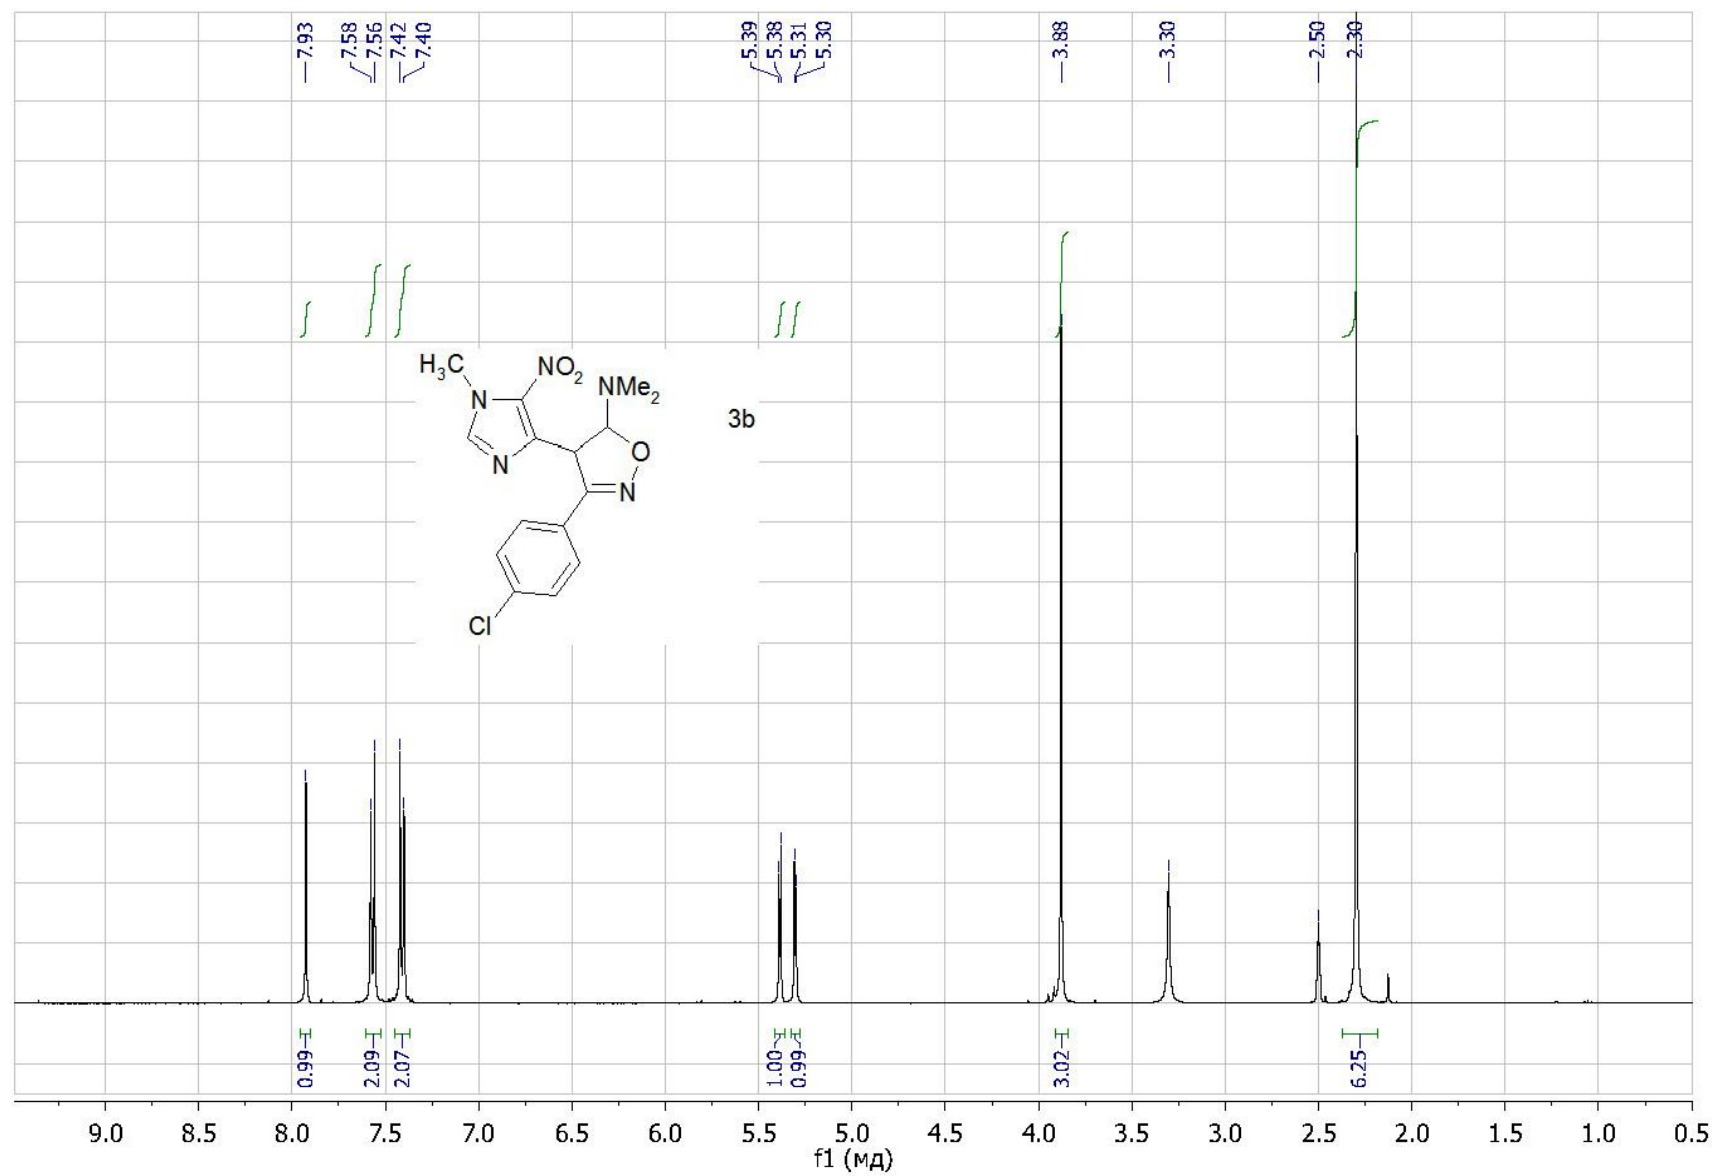

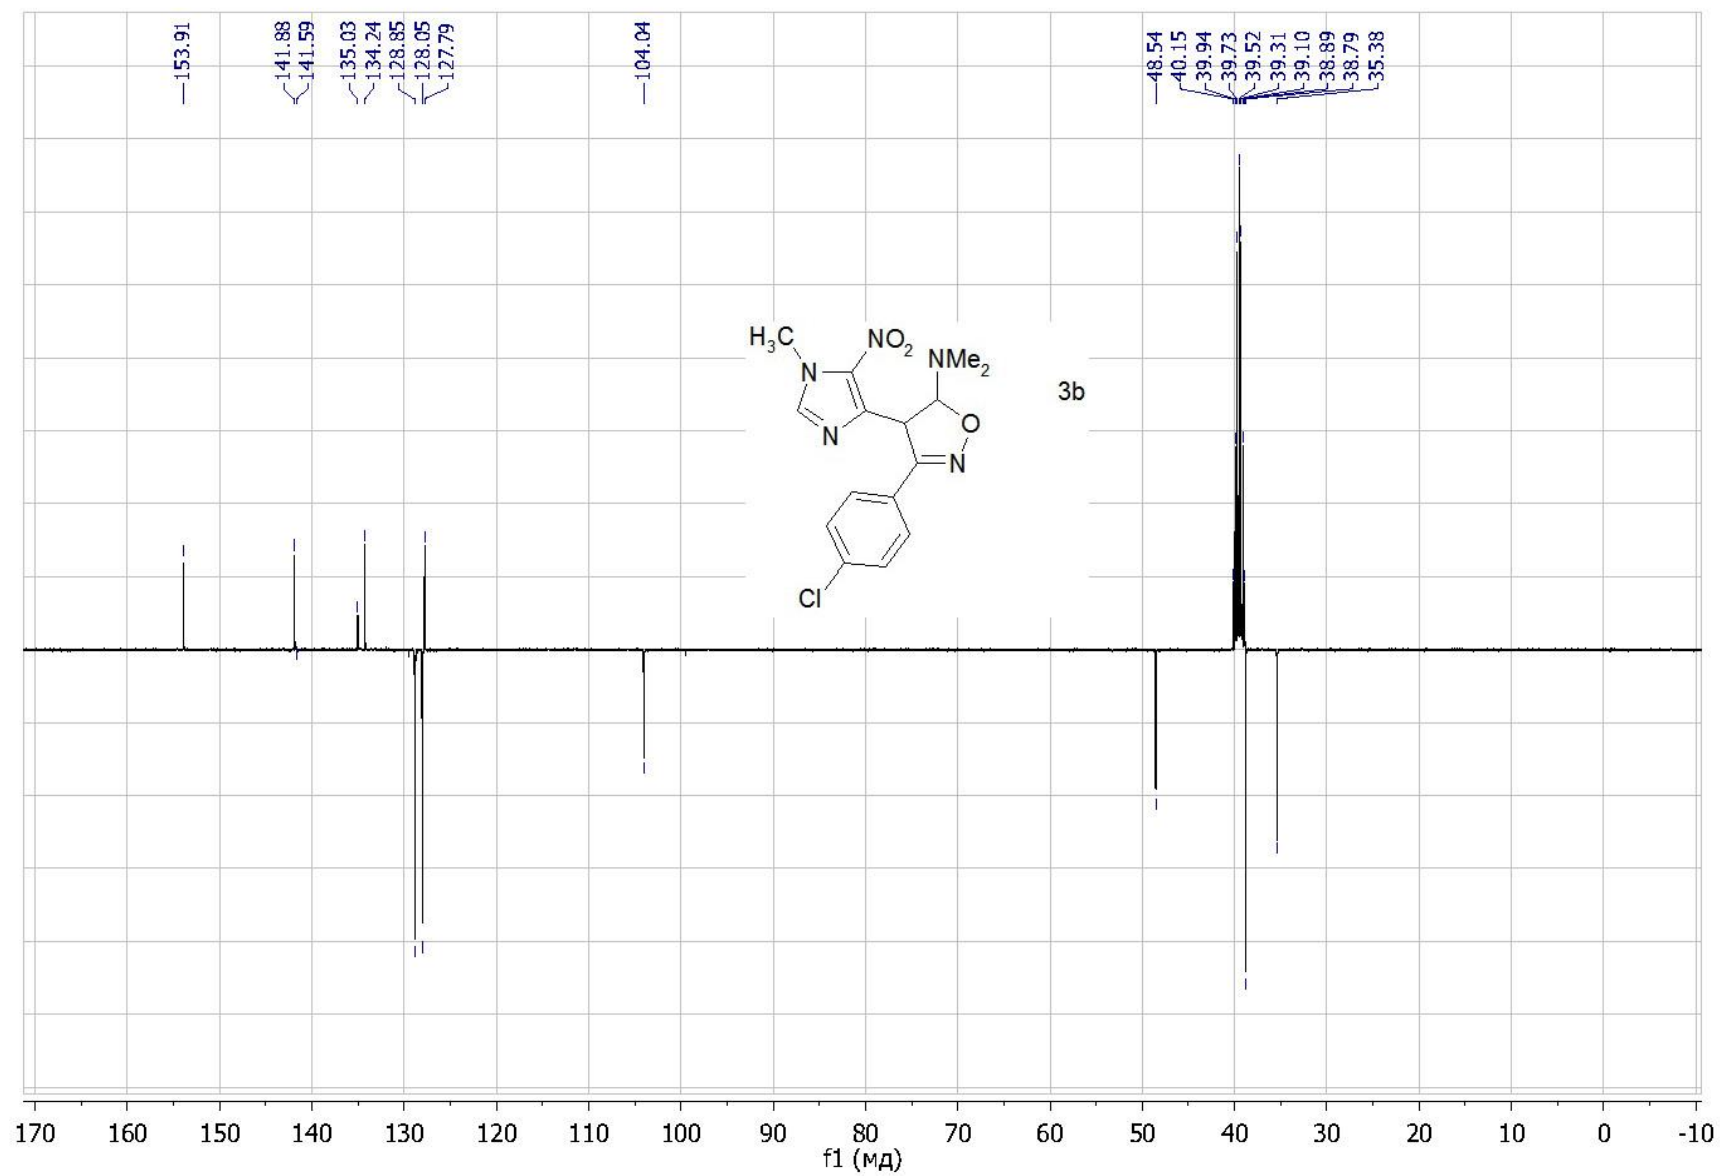

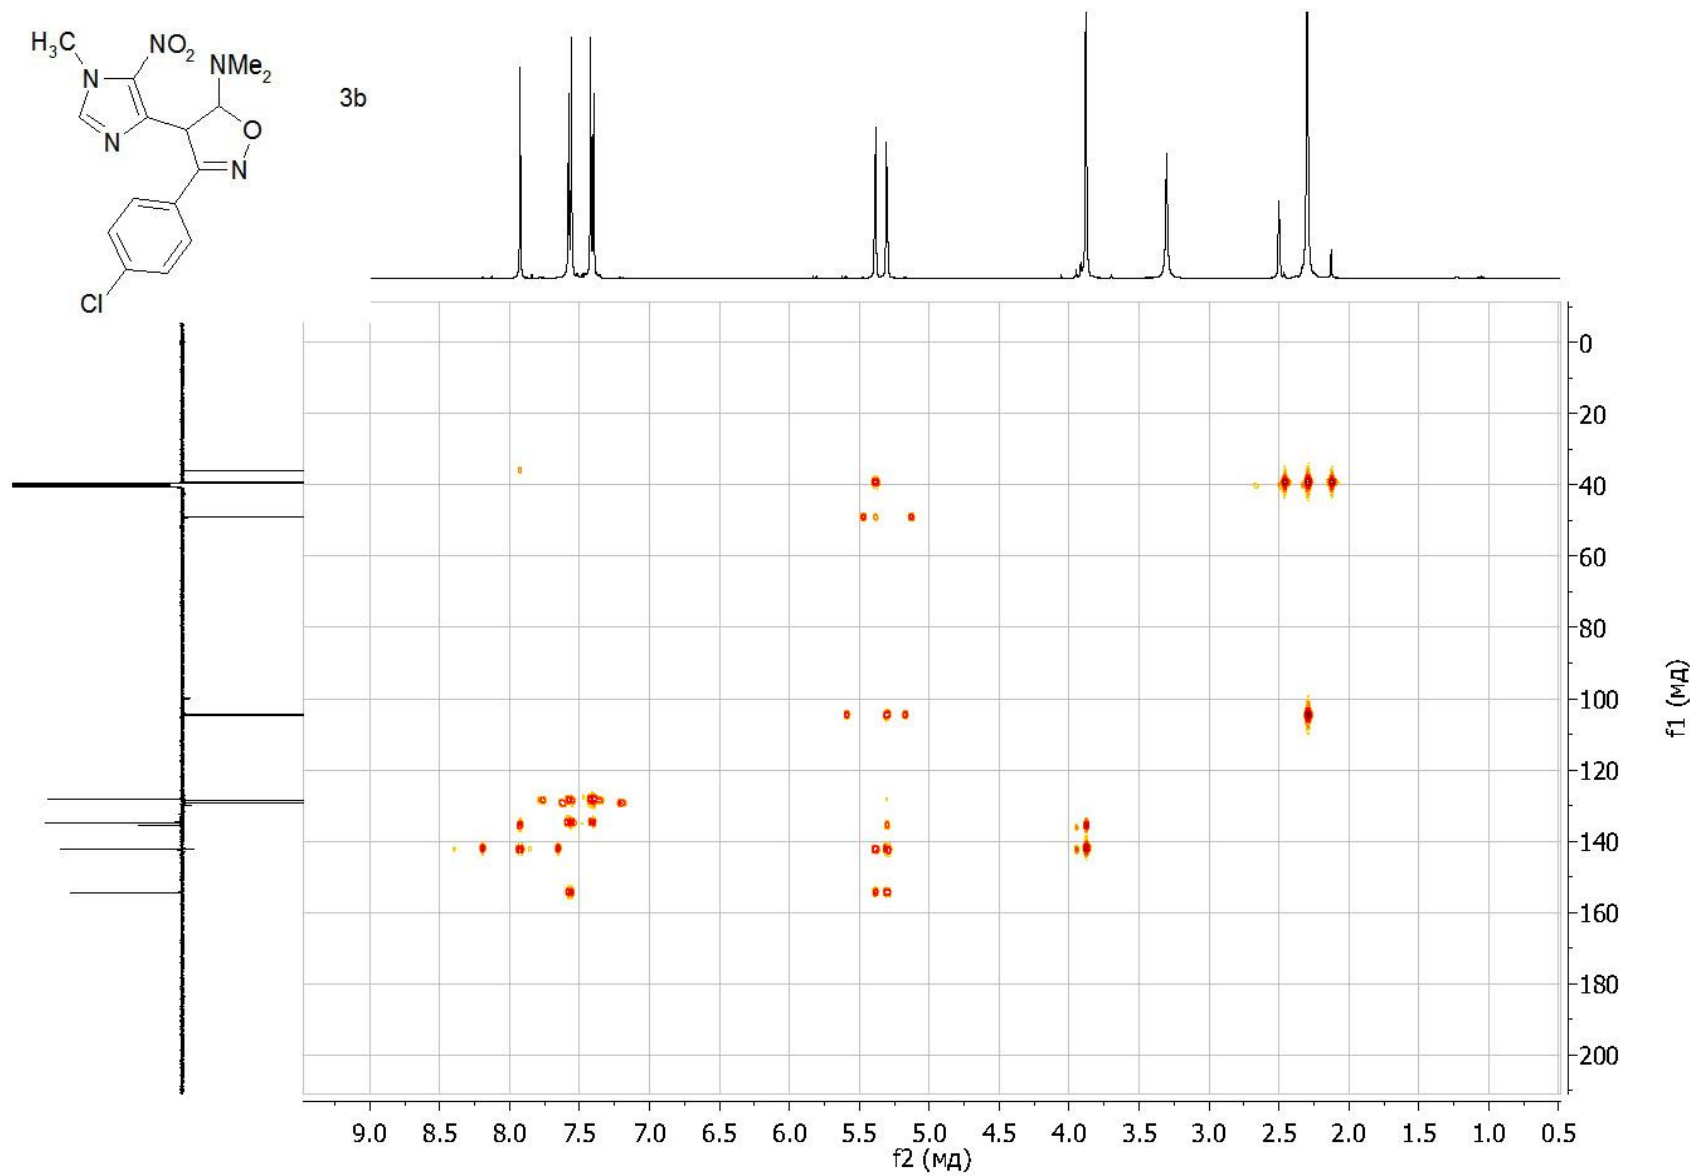

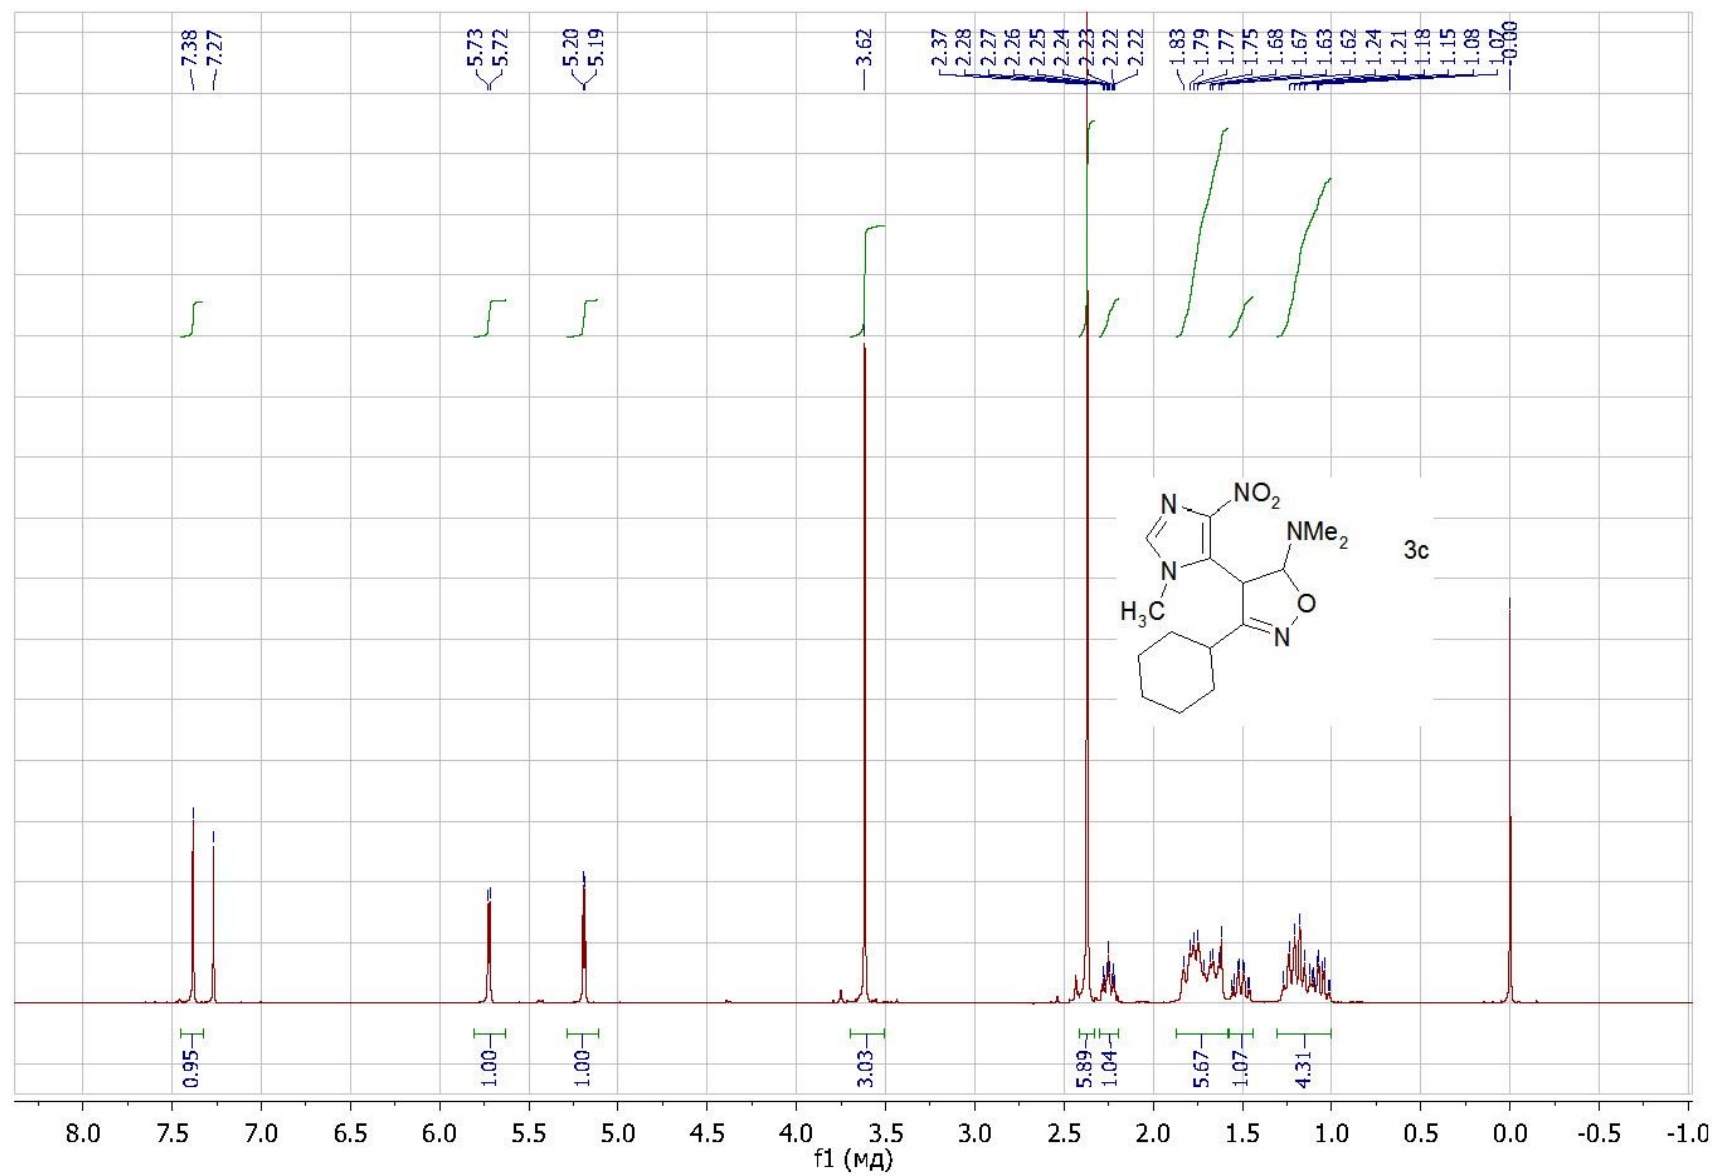

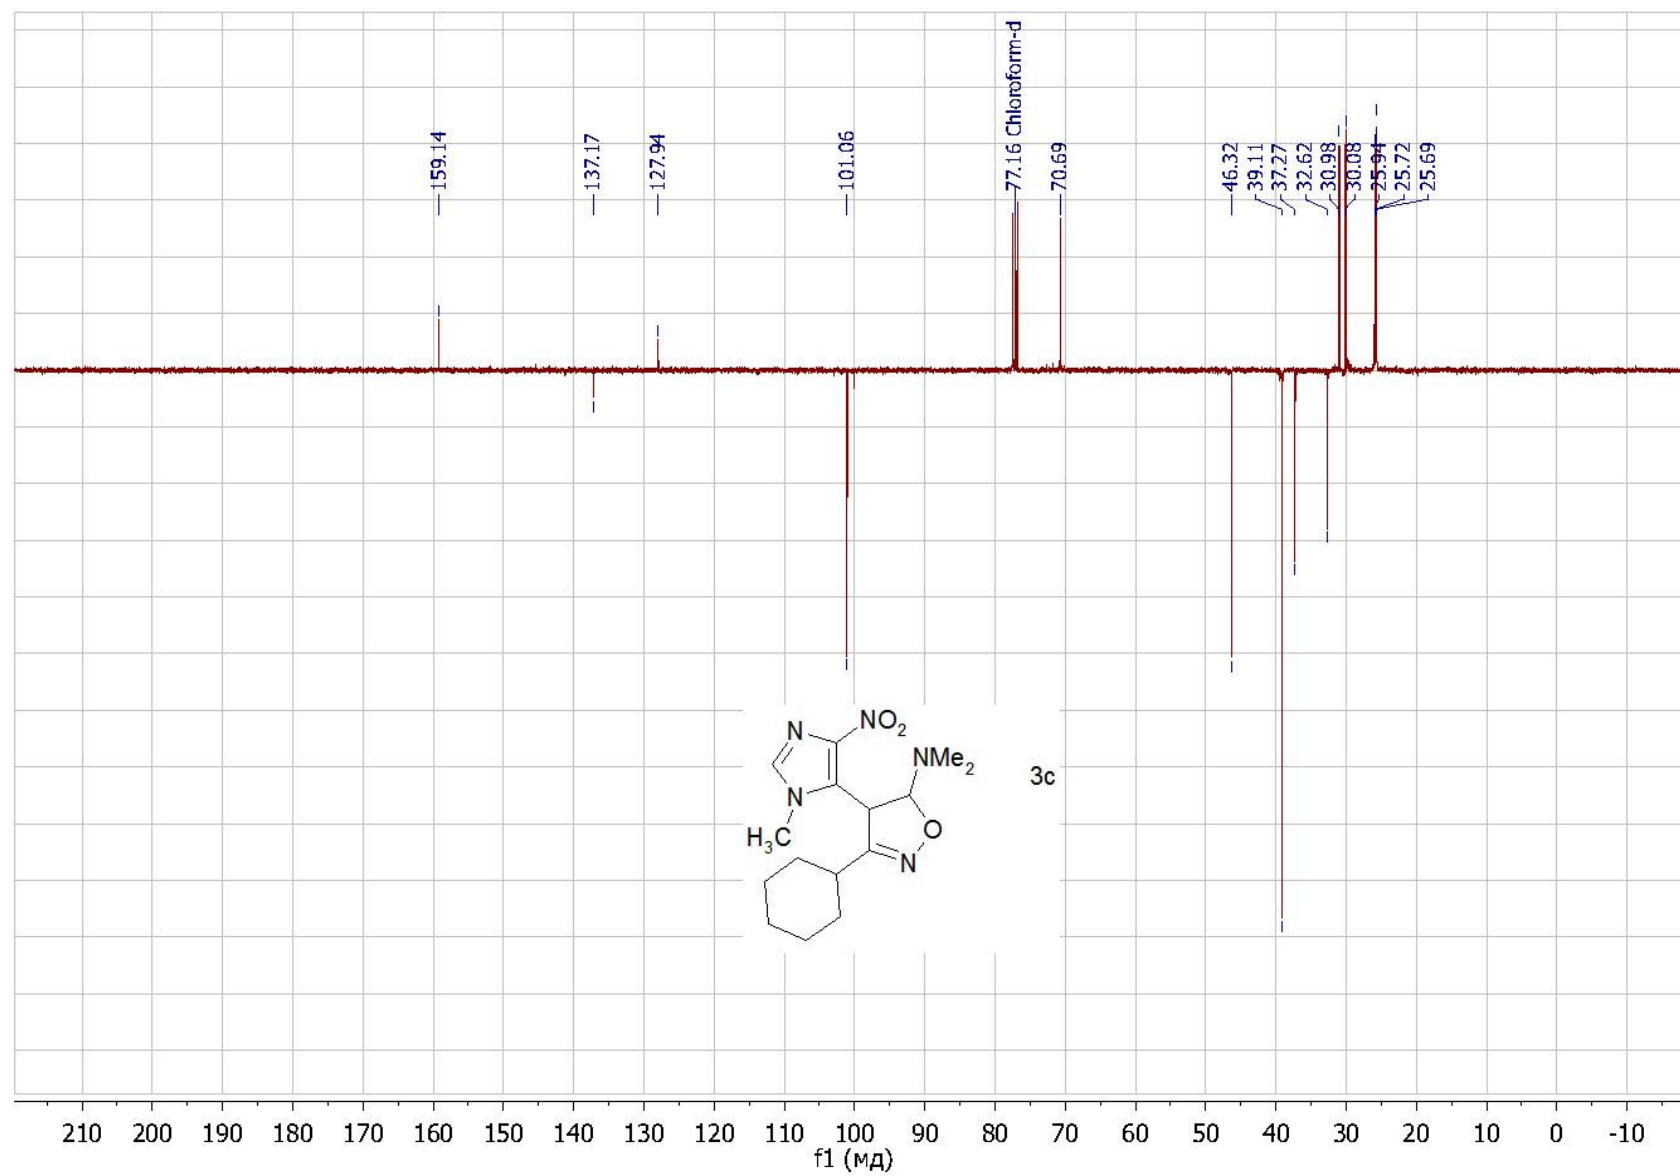

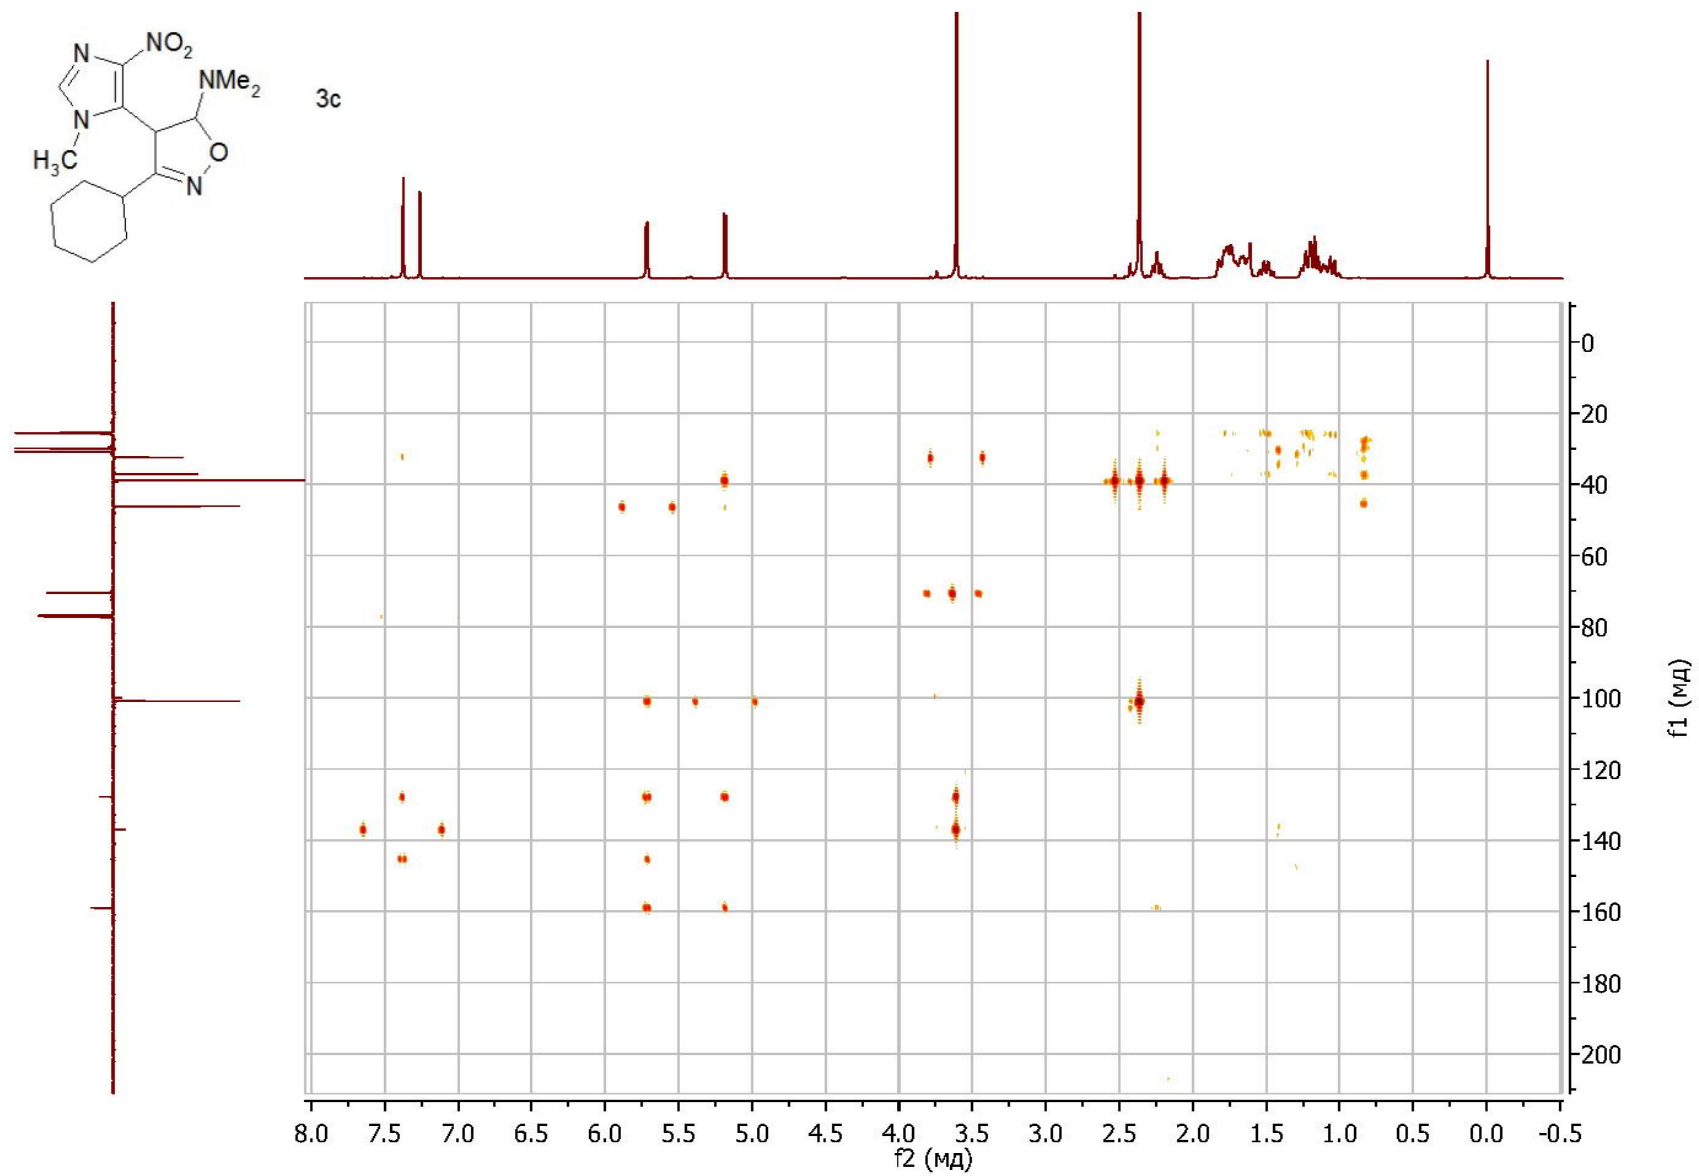

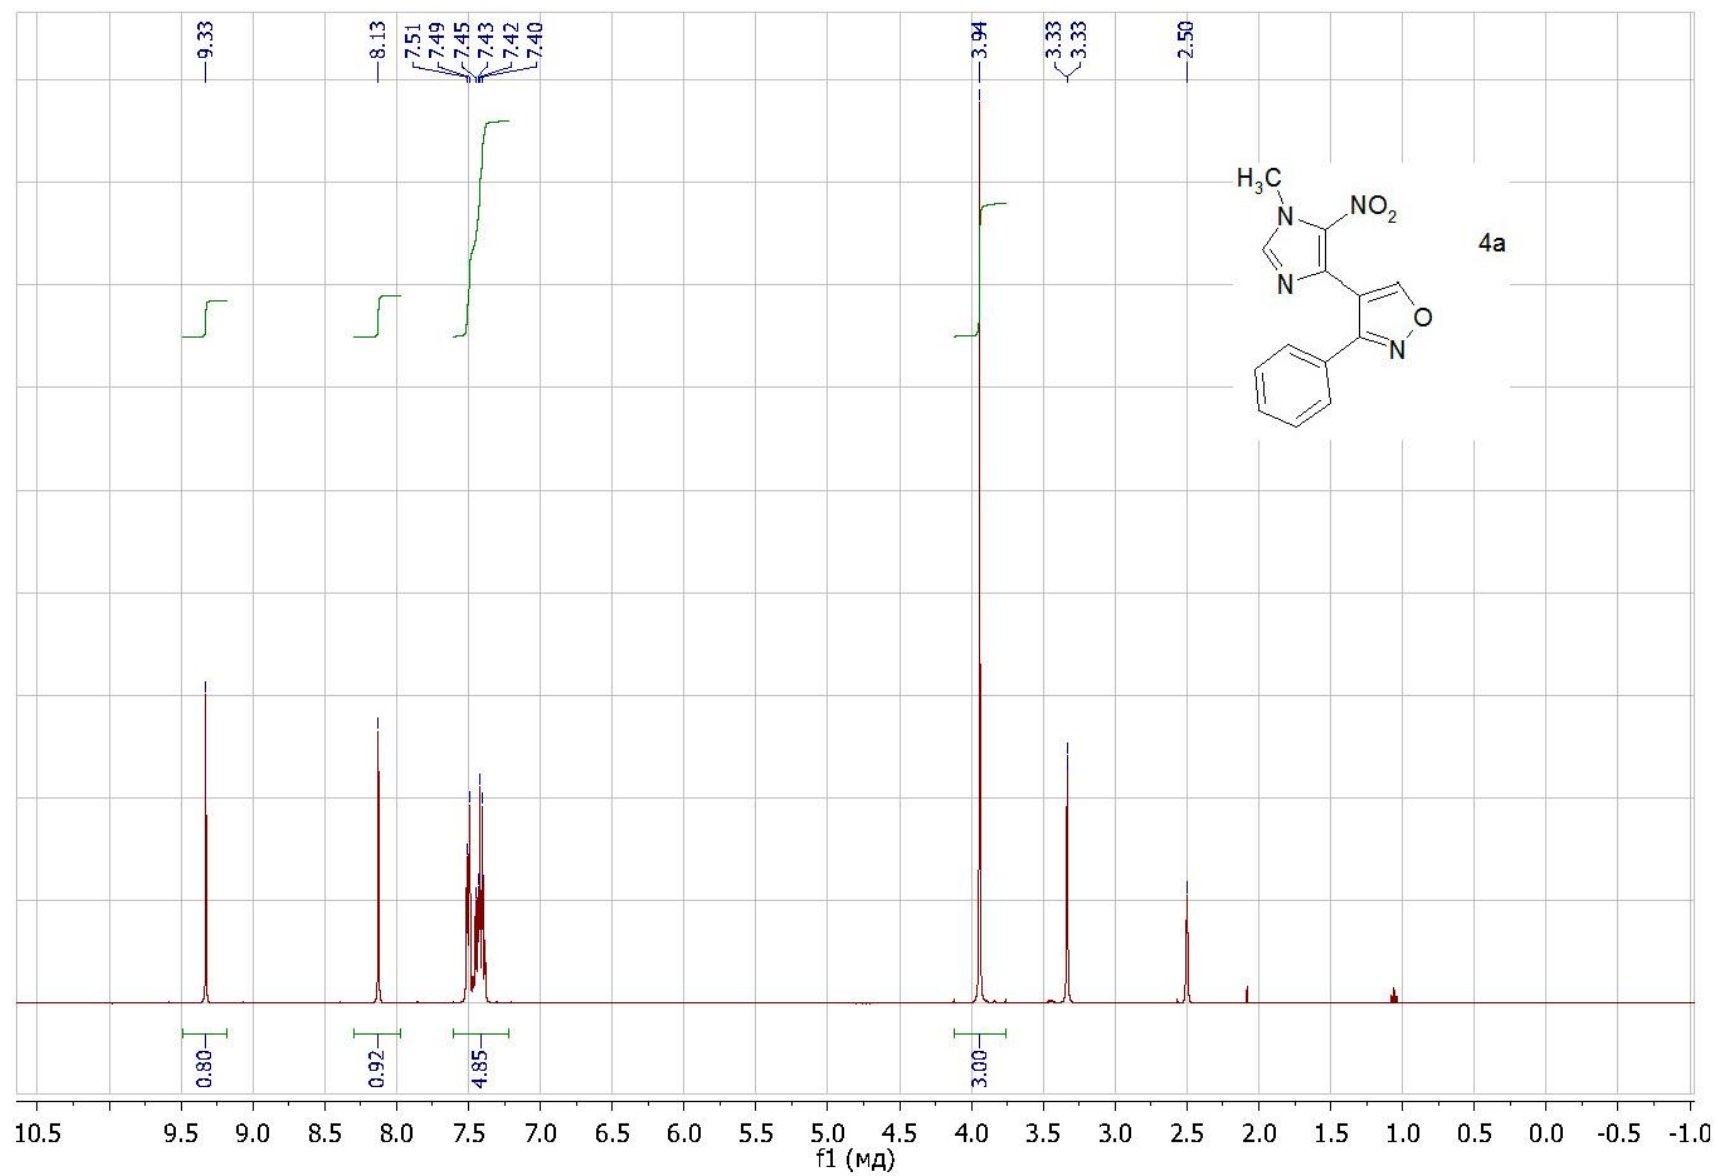

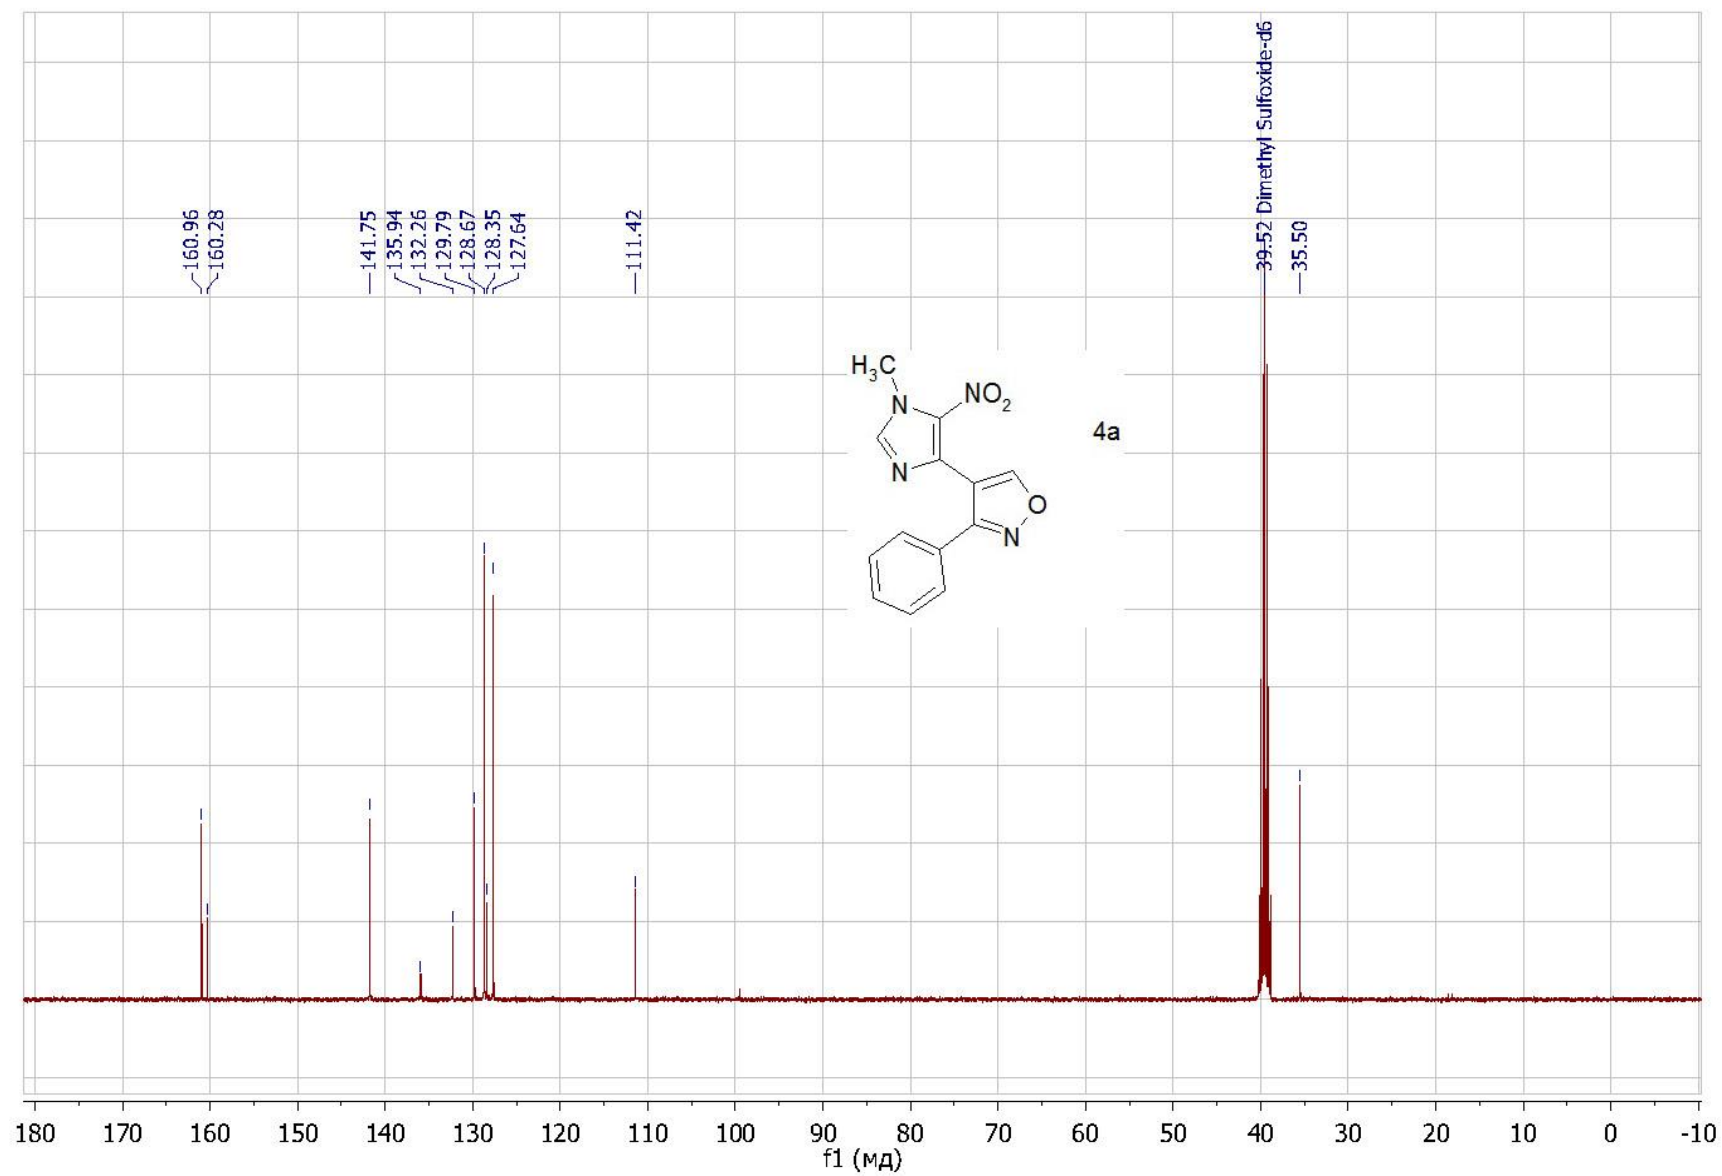

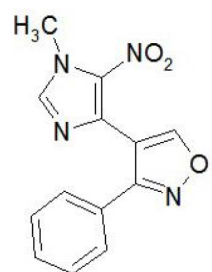

4a

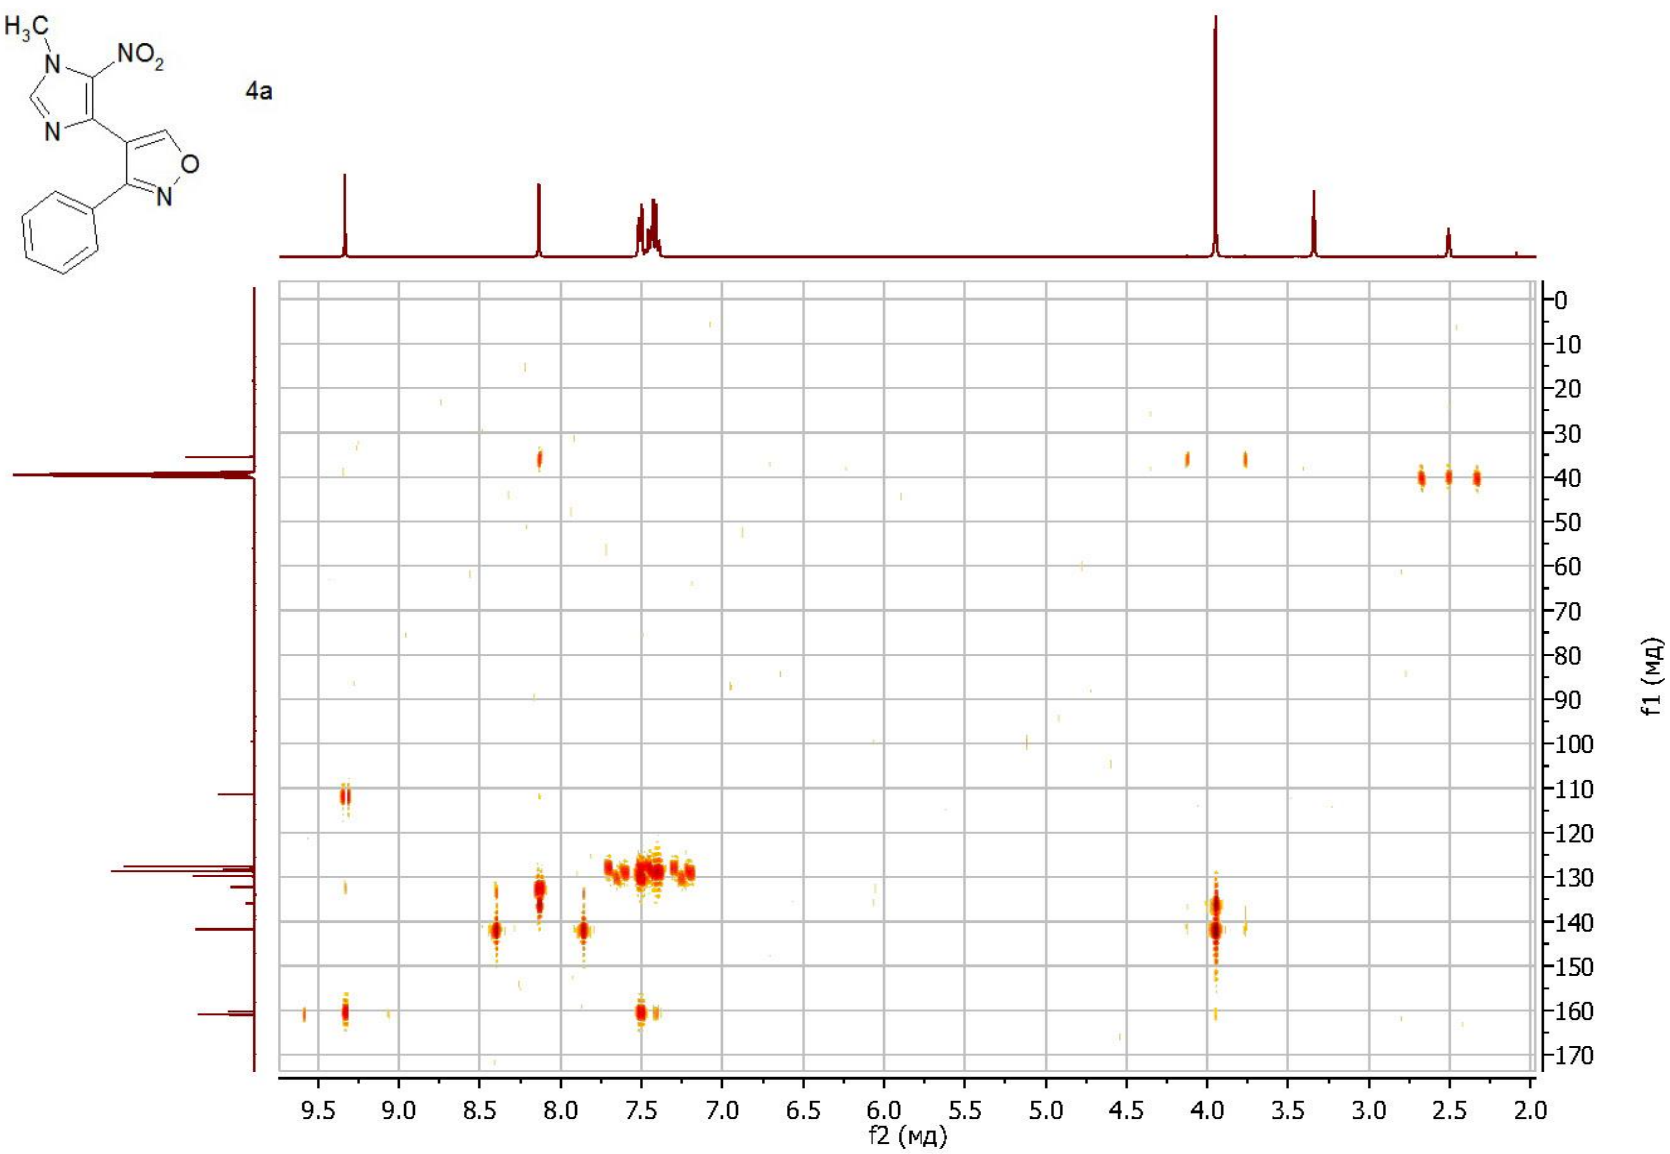

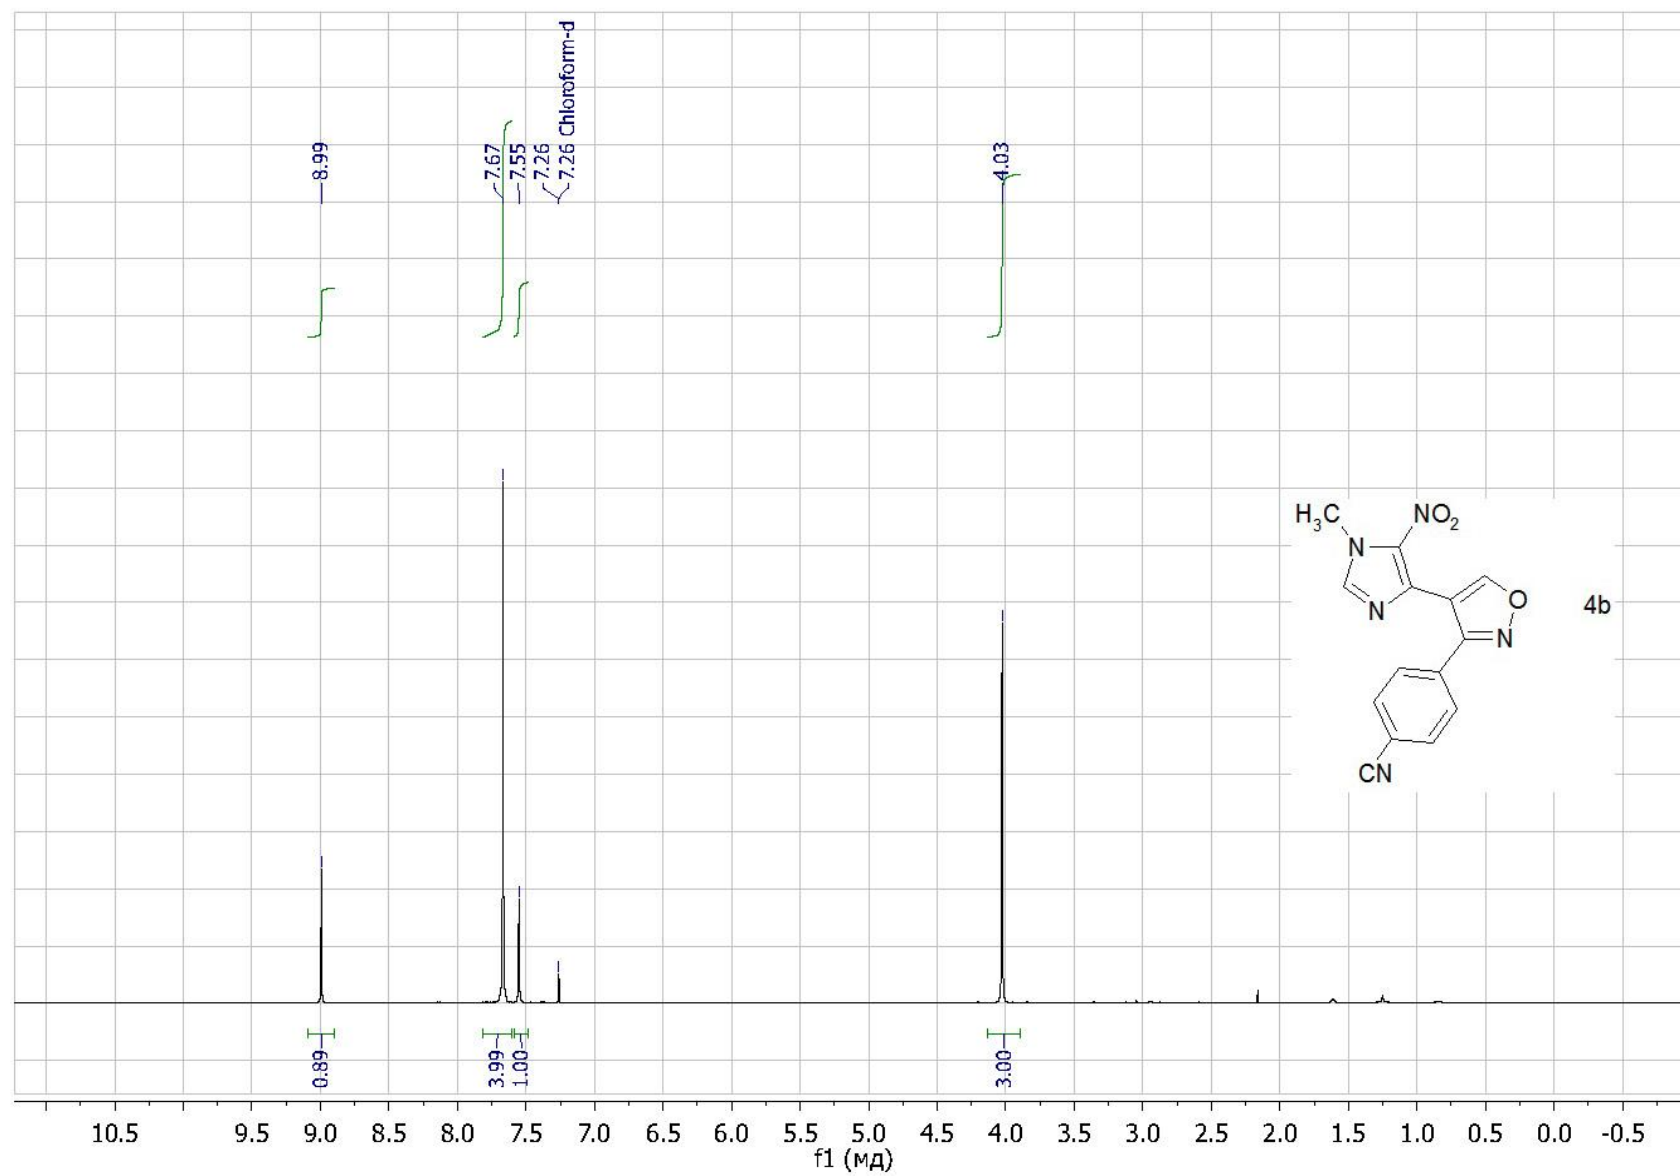

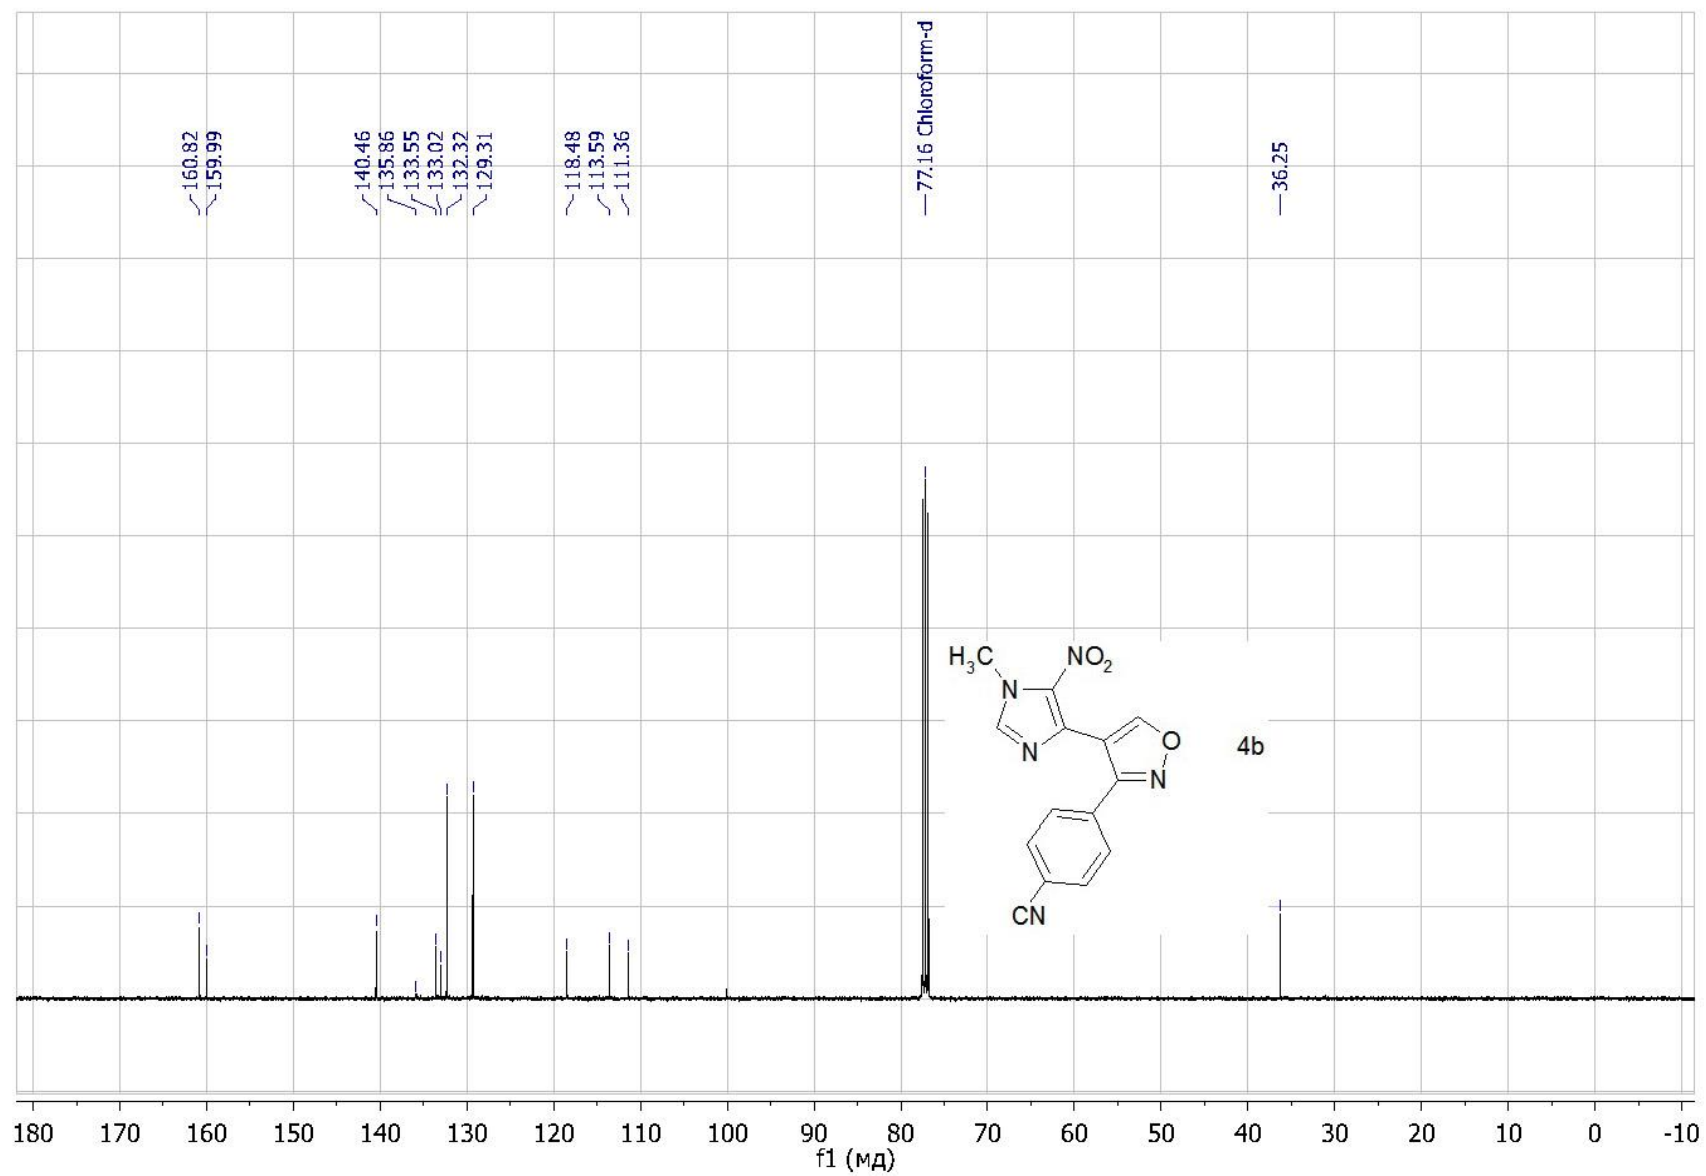

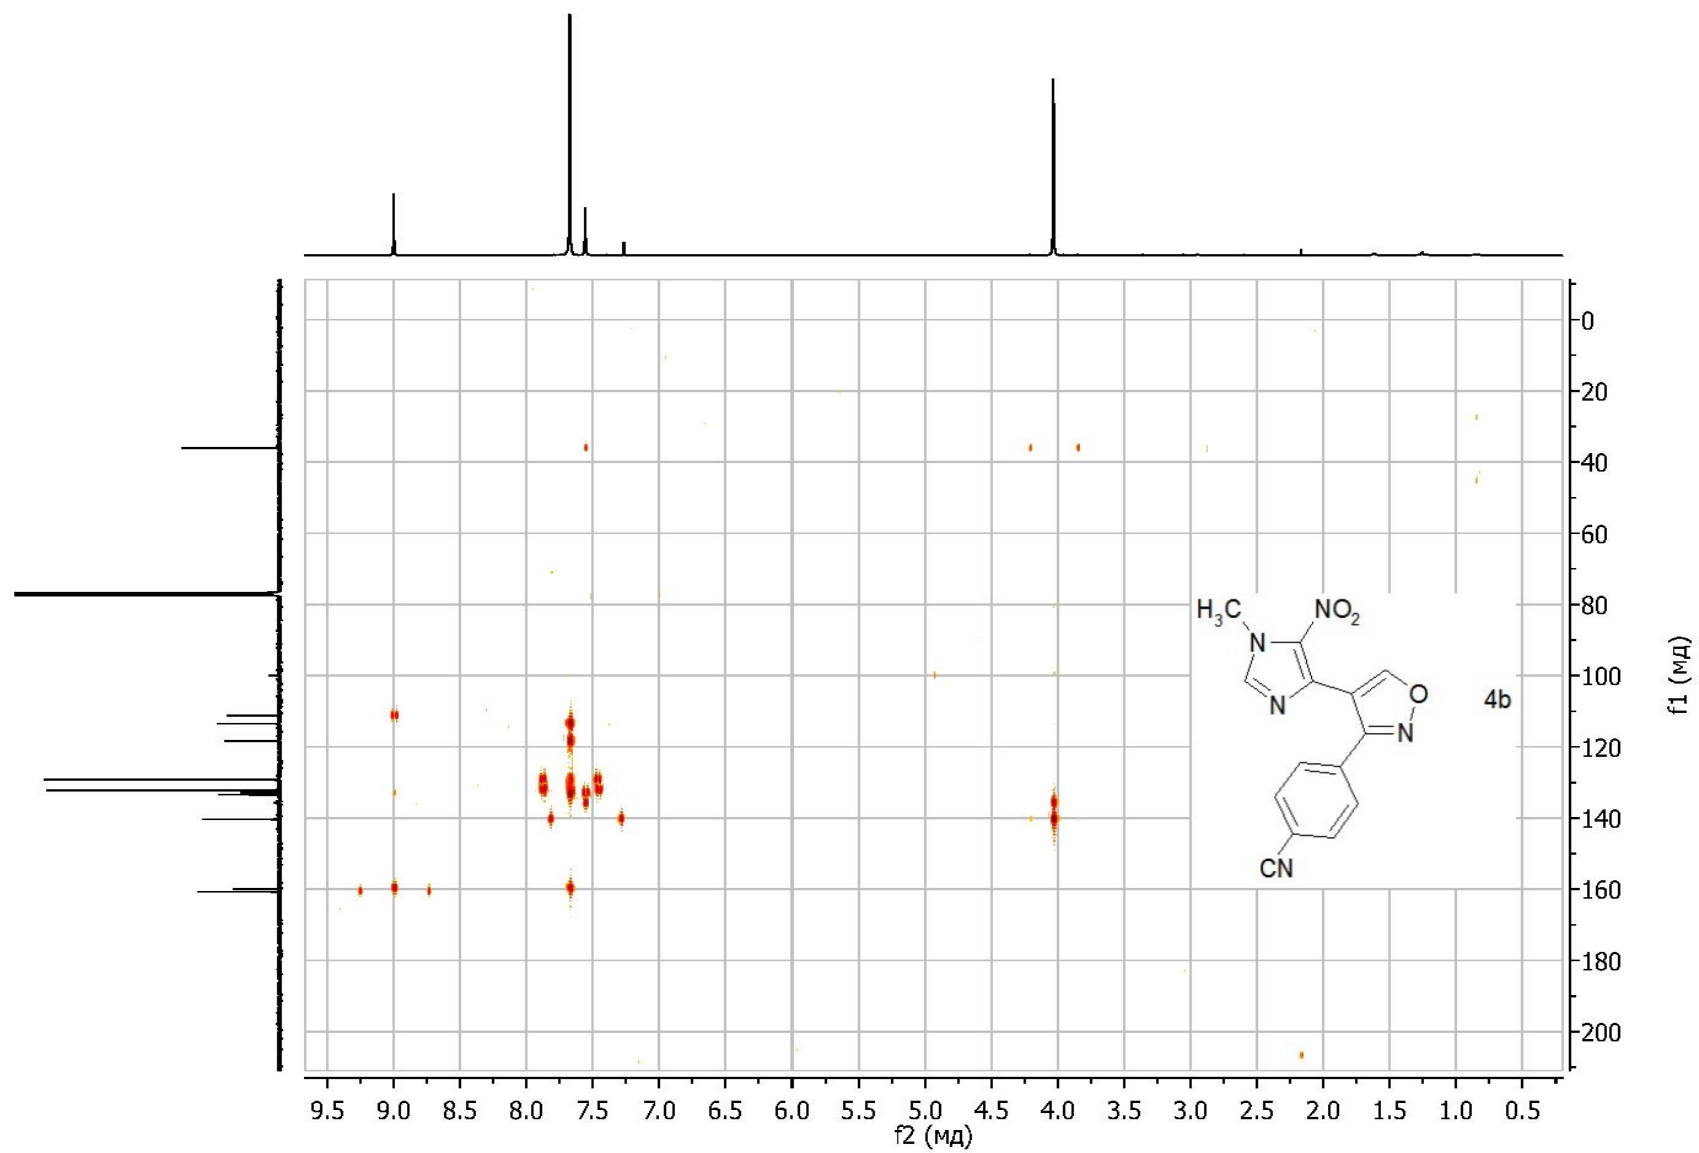

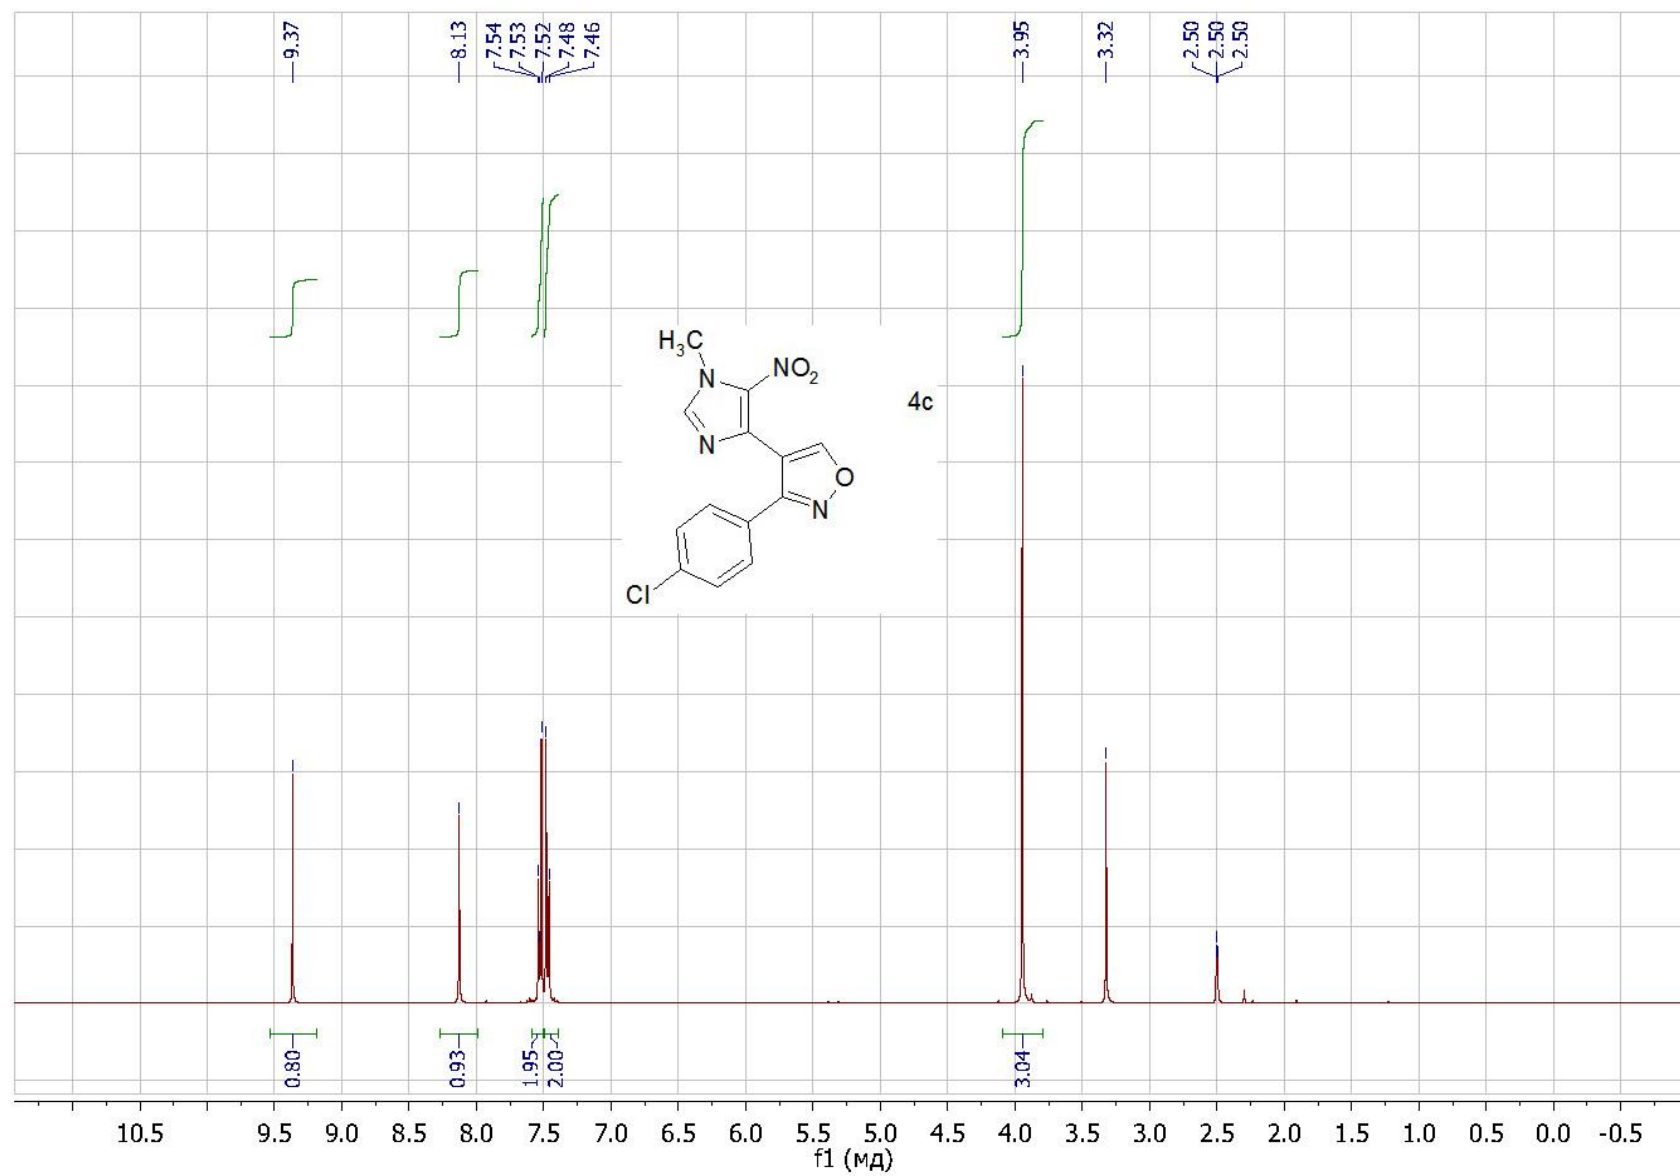

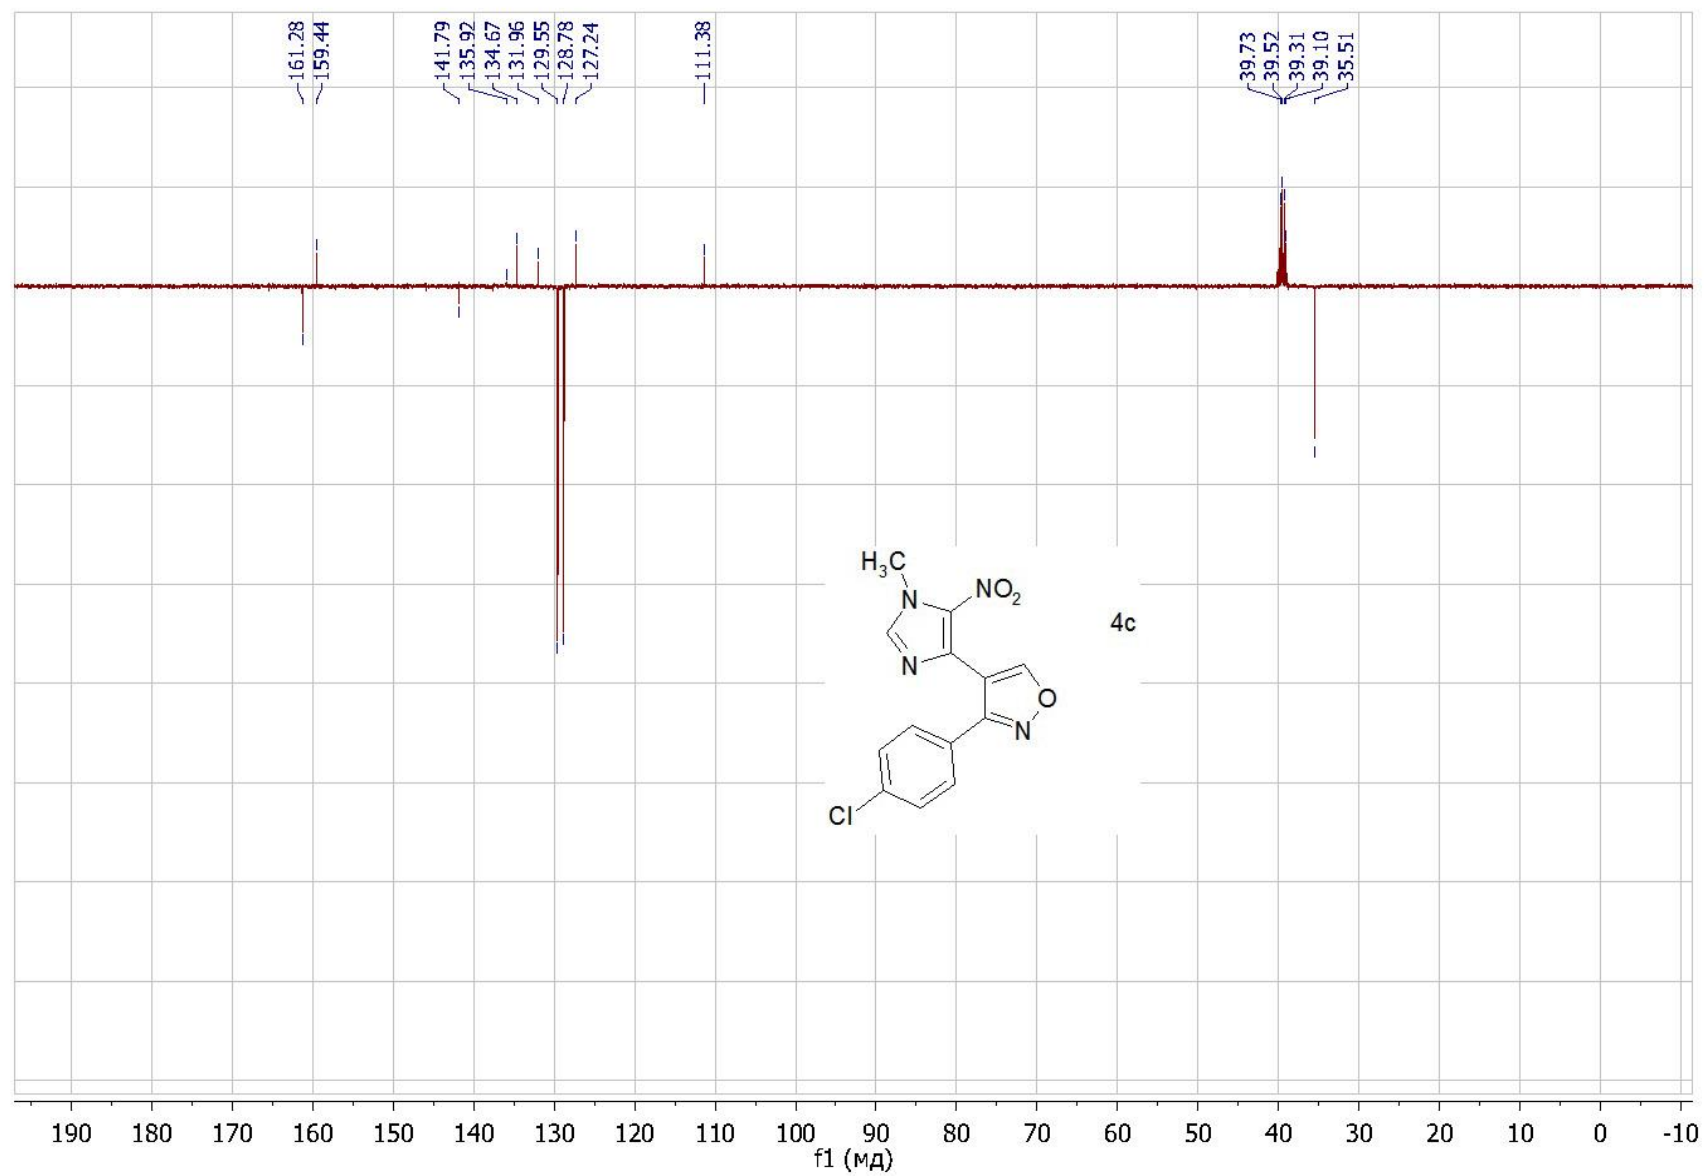

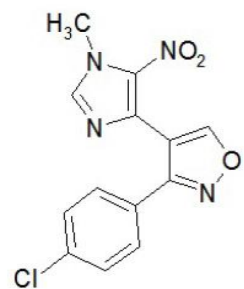

4c

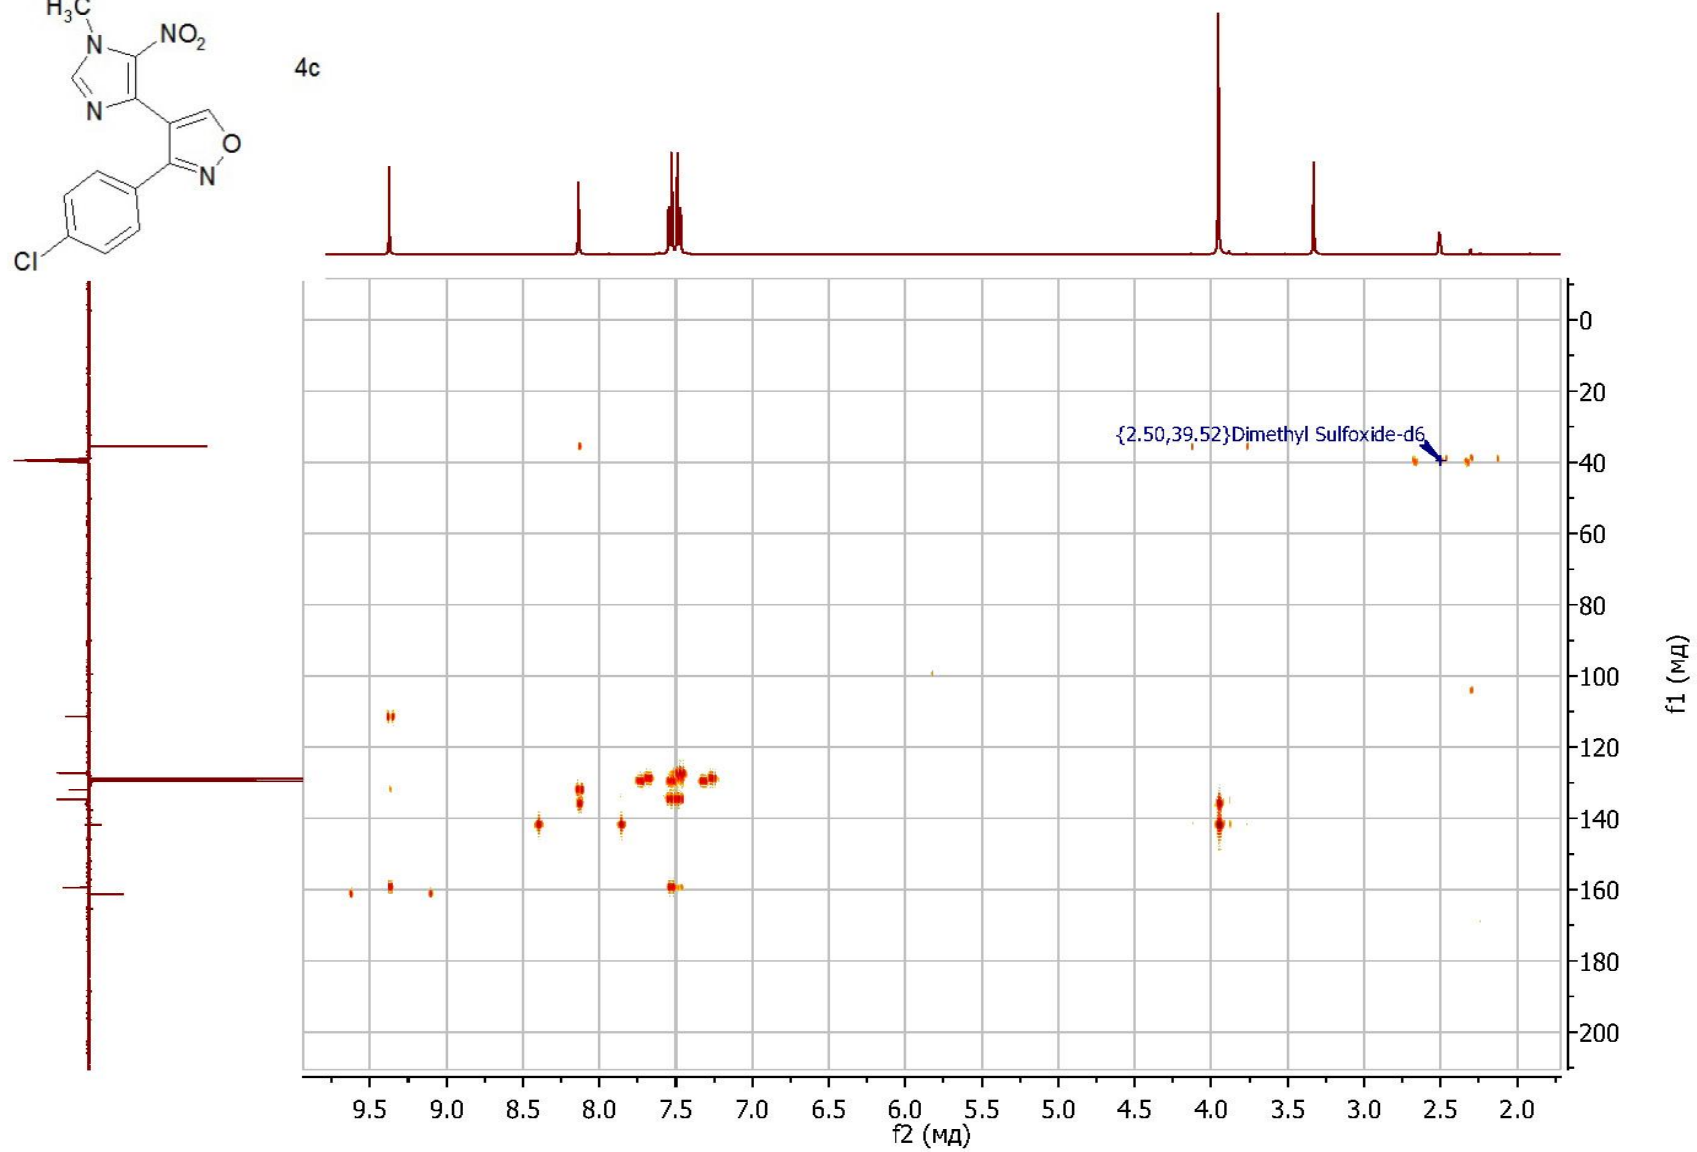

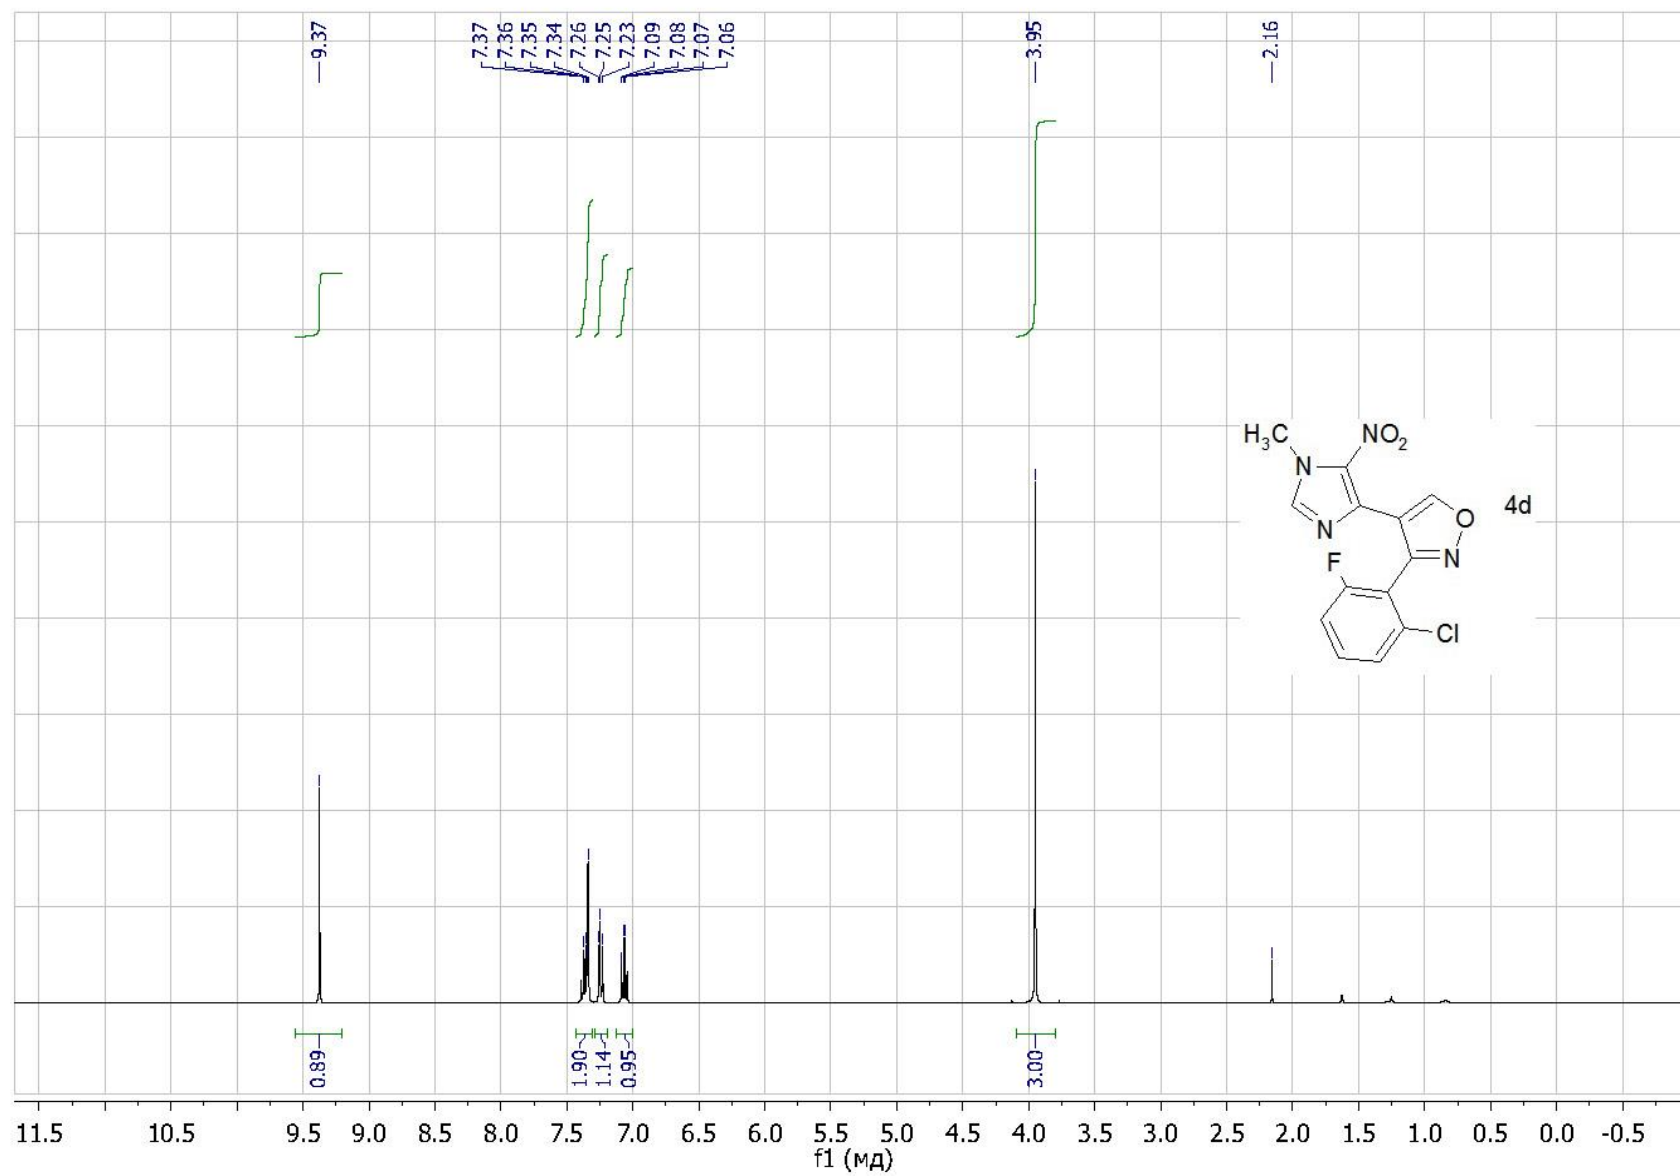

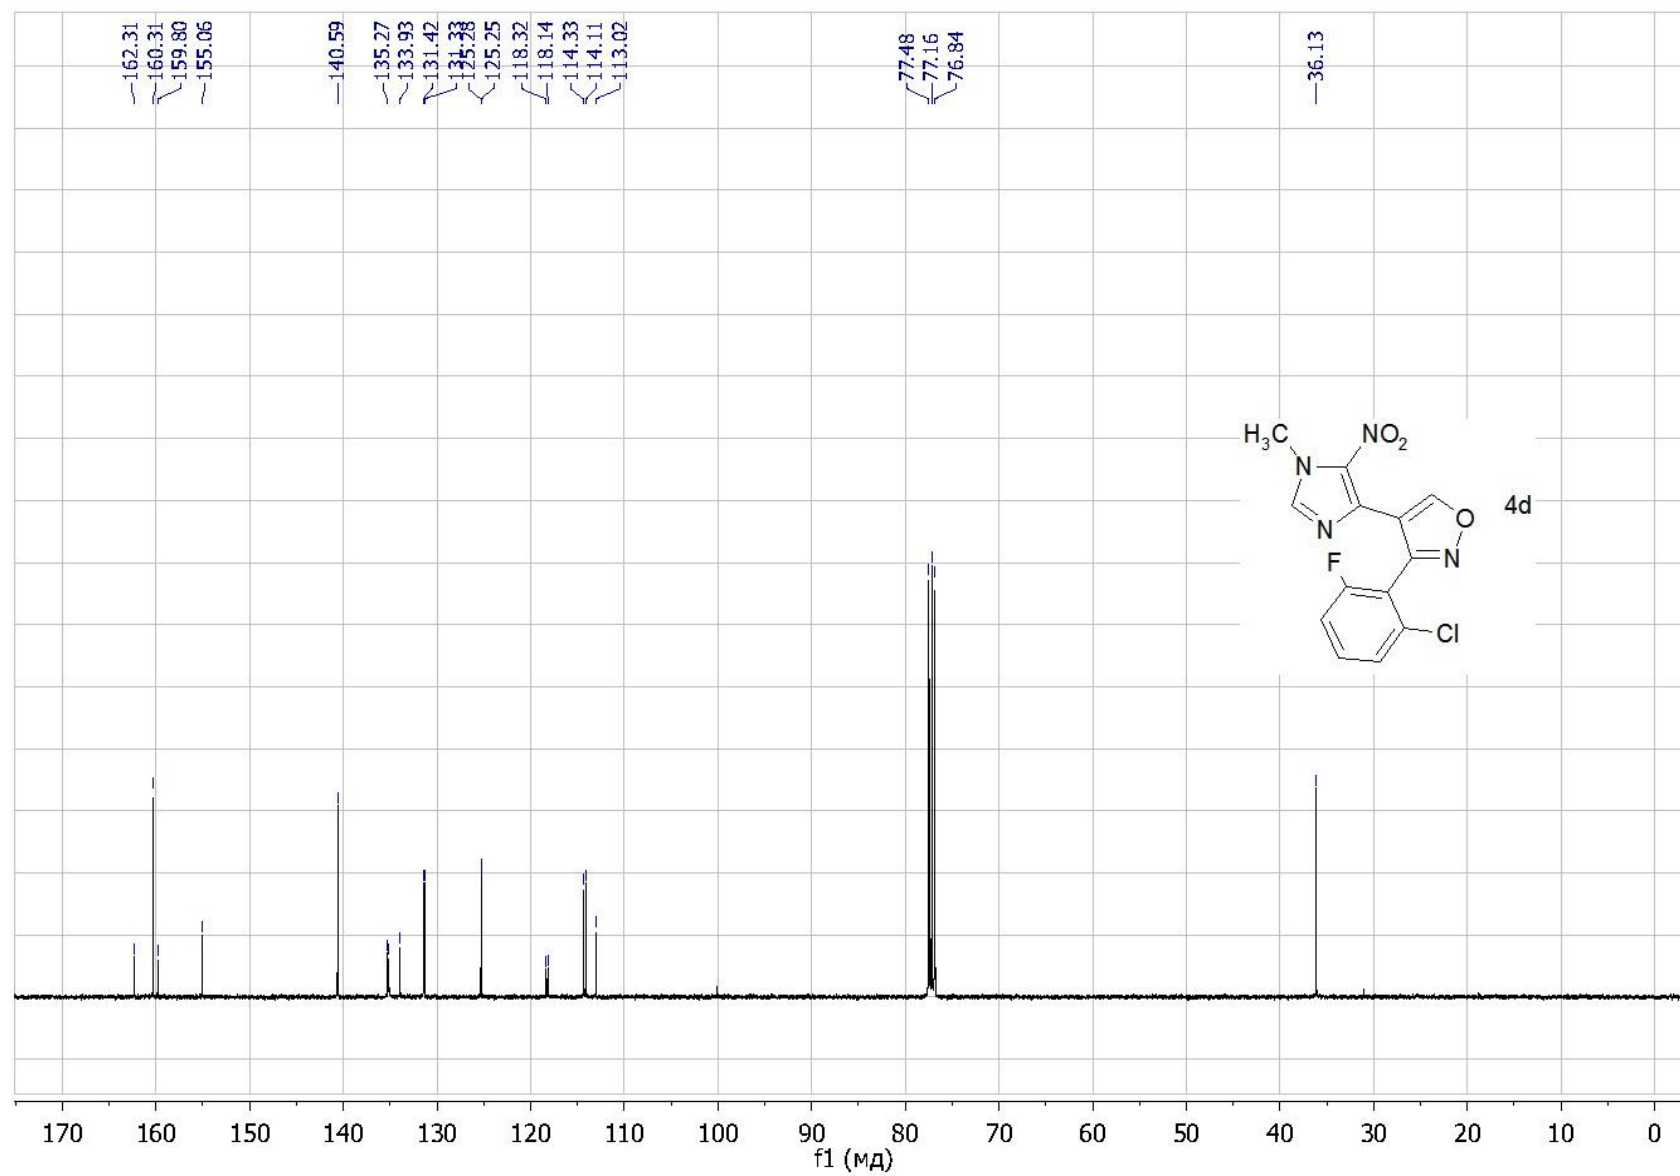

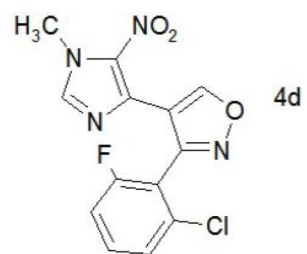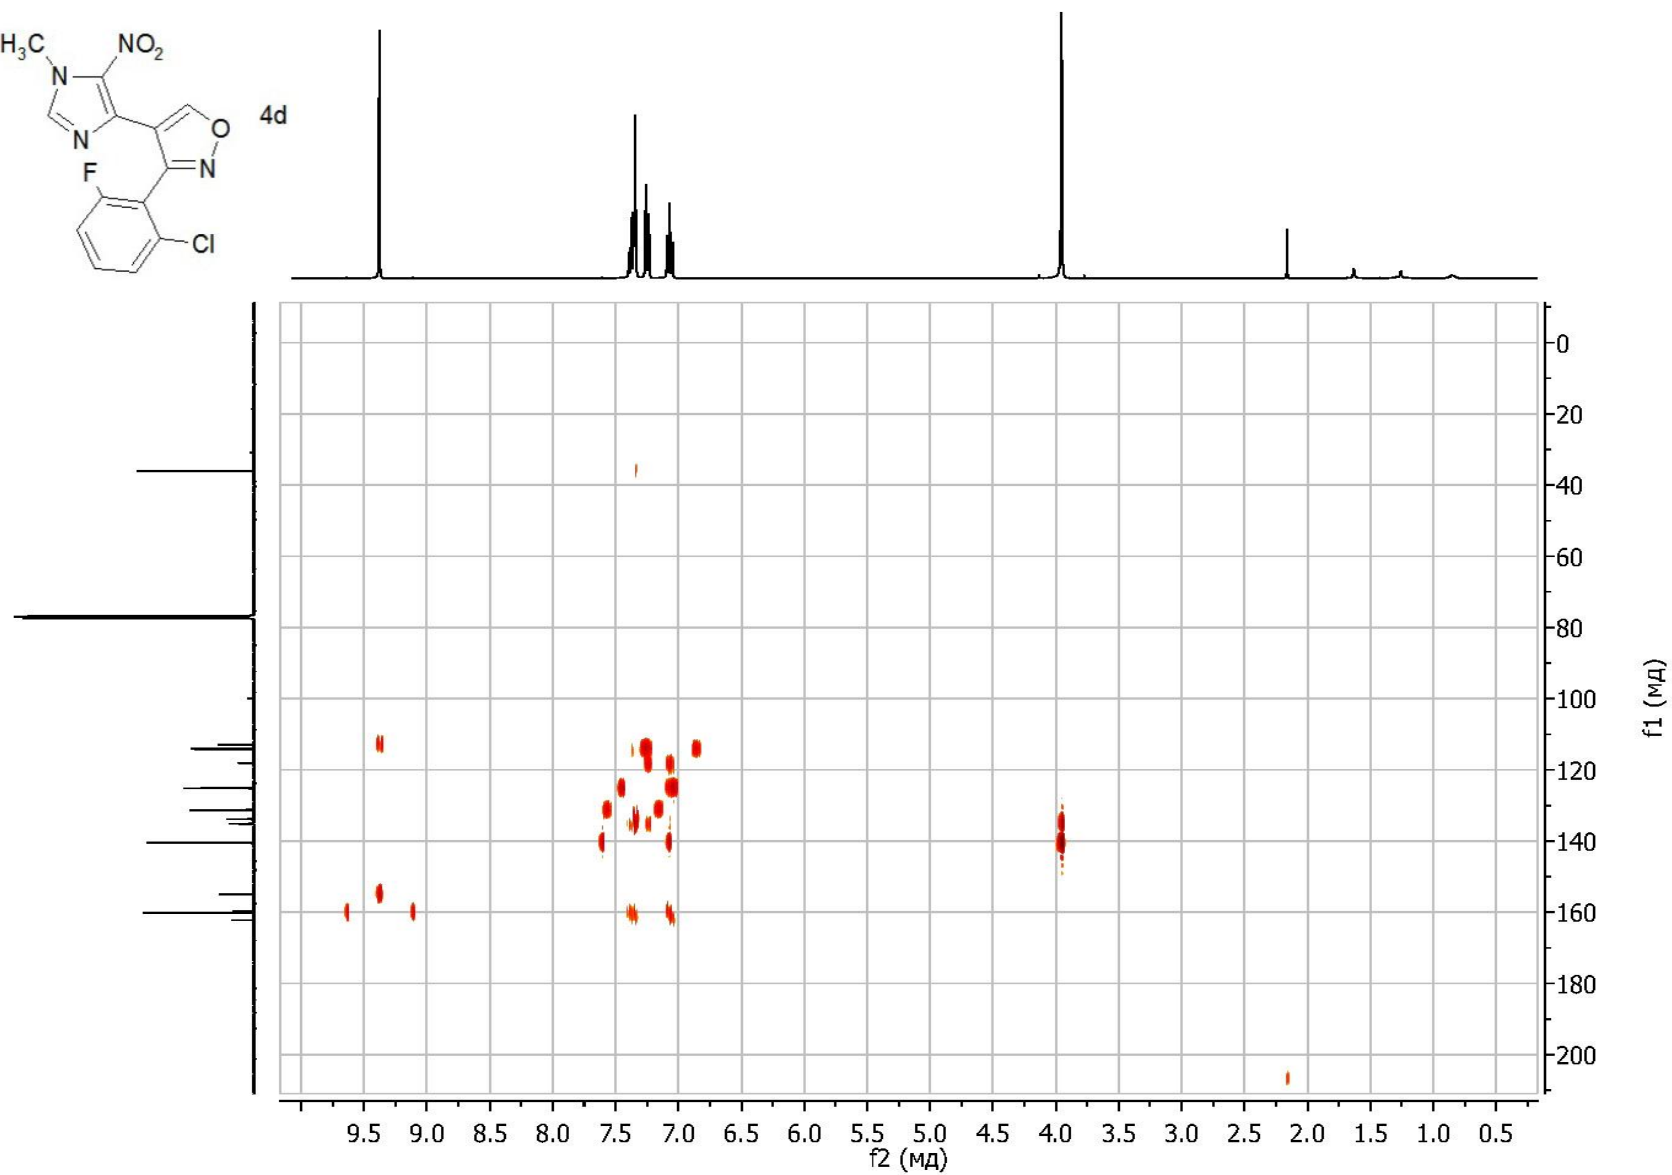

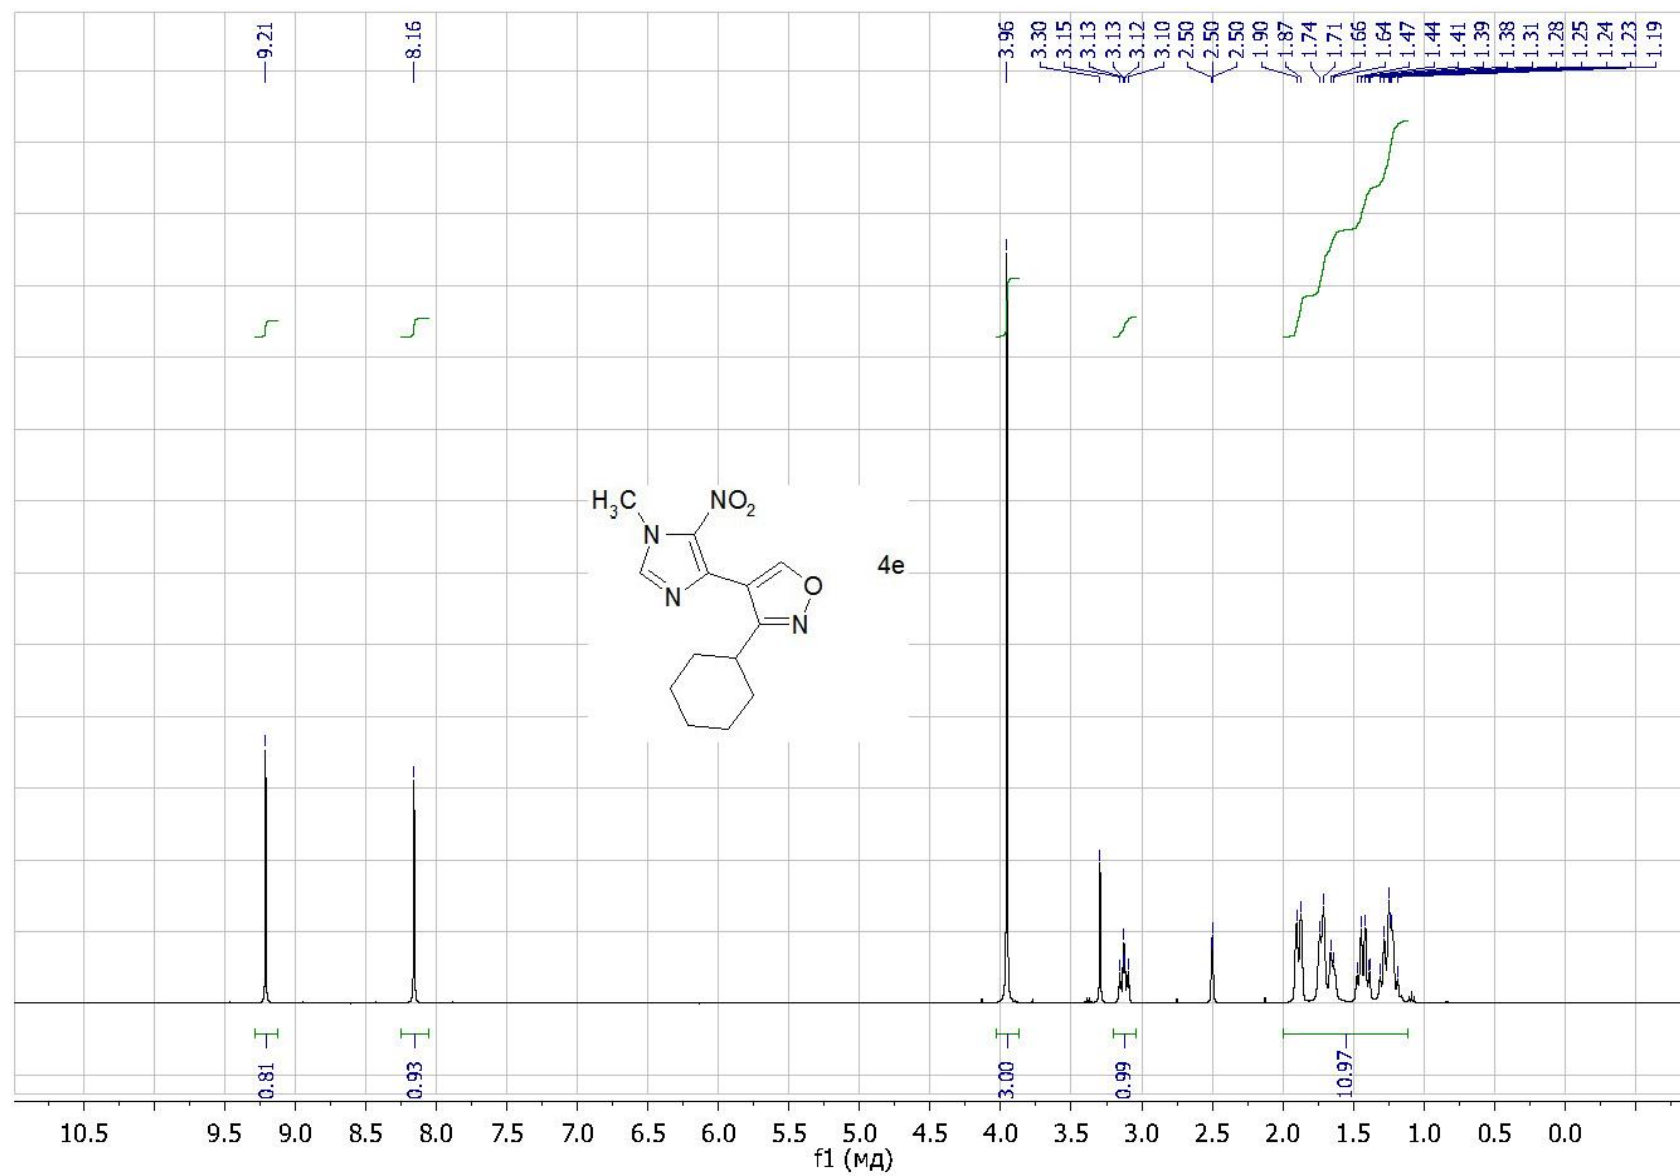

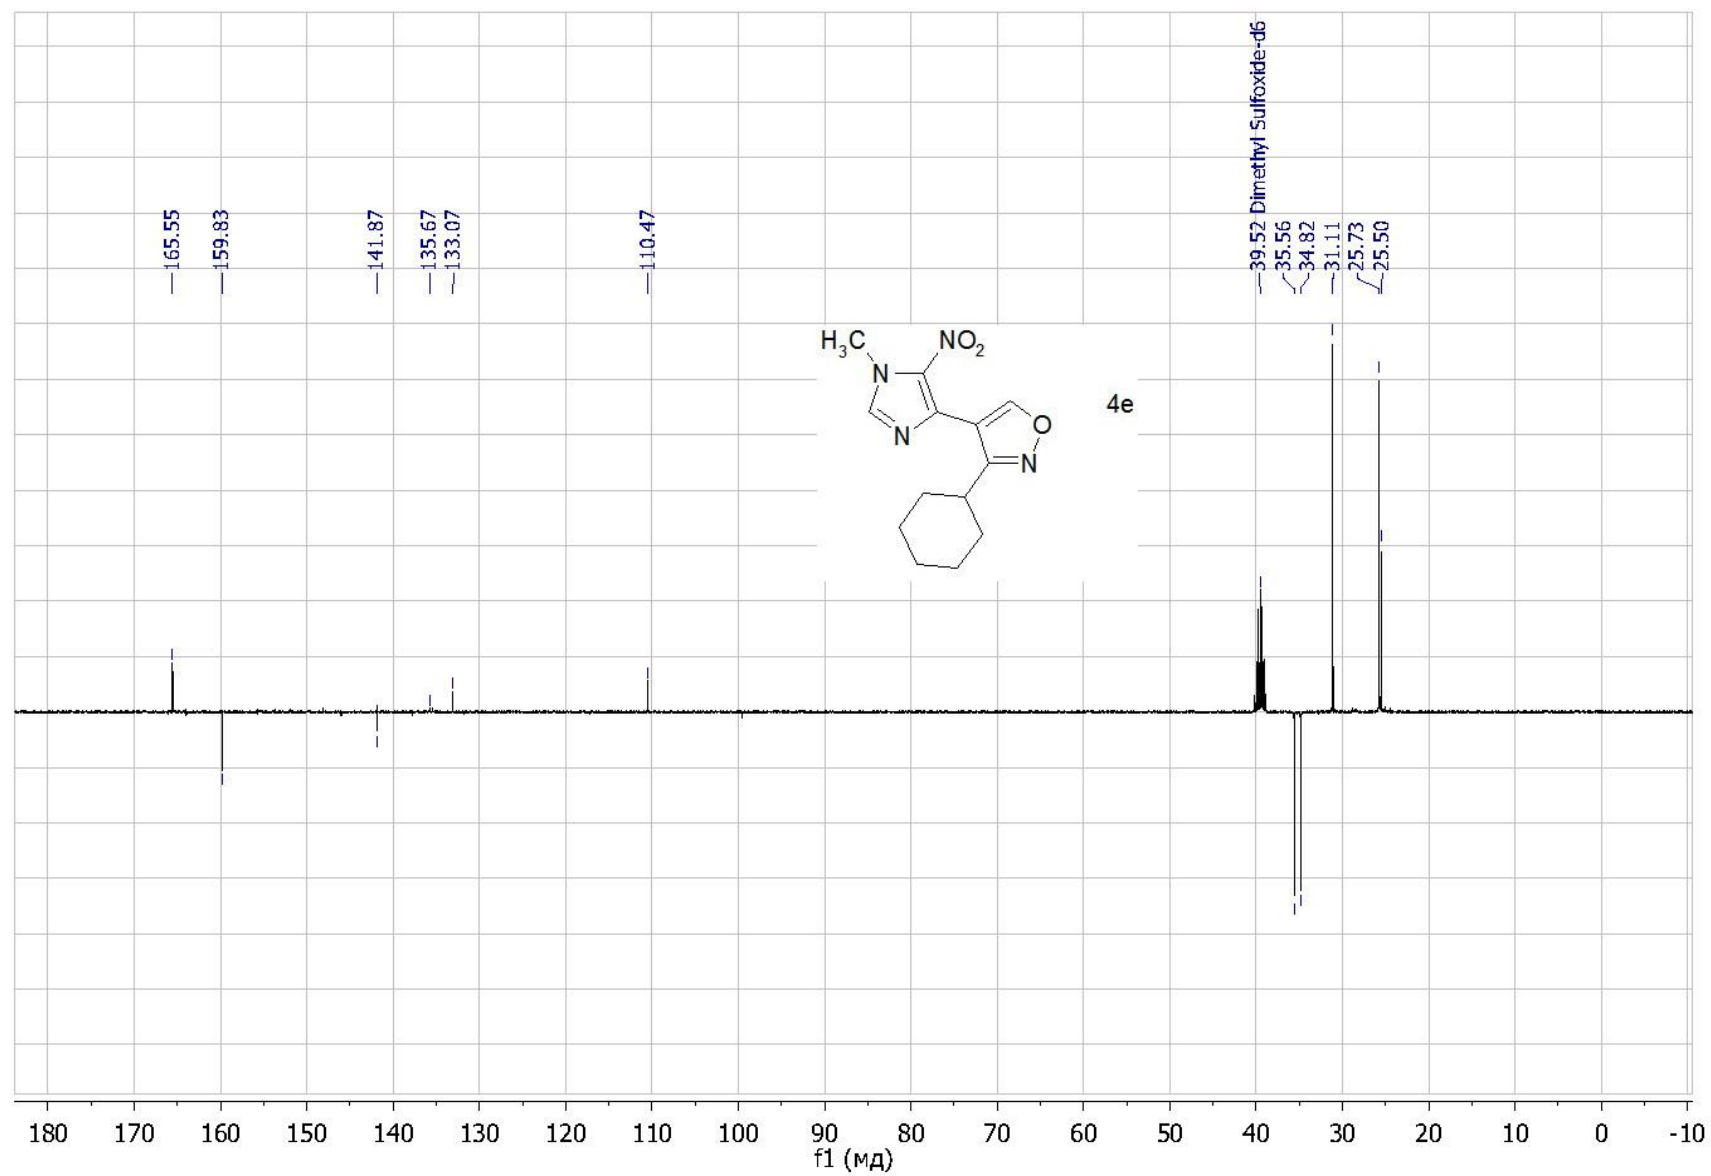

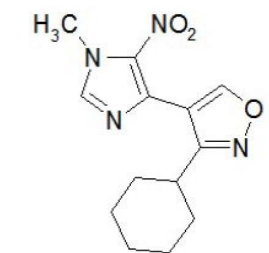

4e

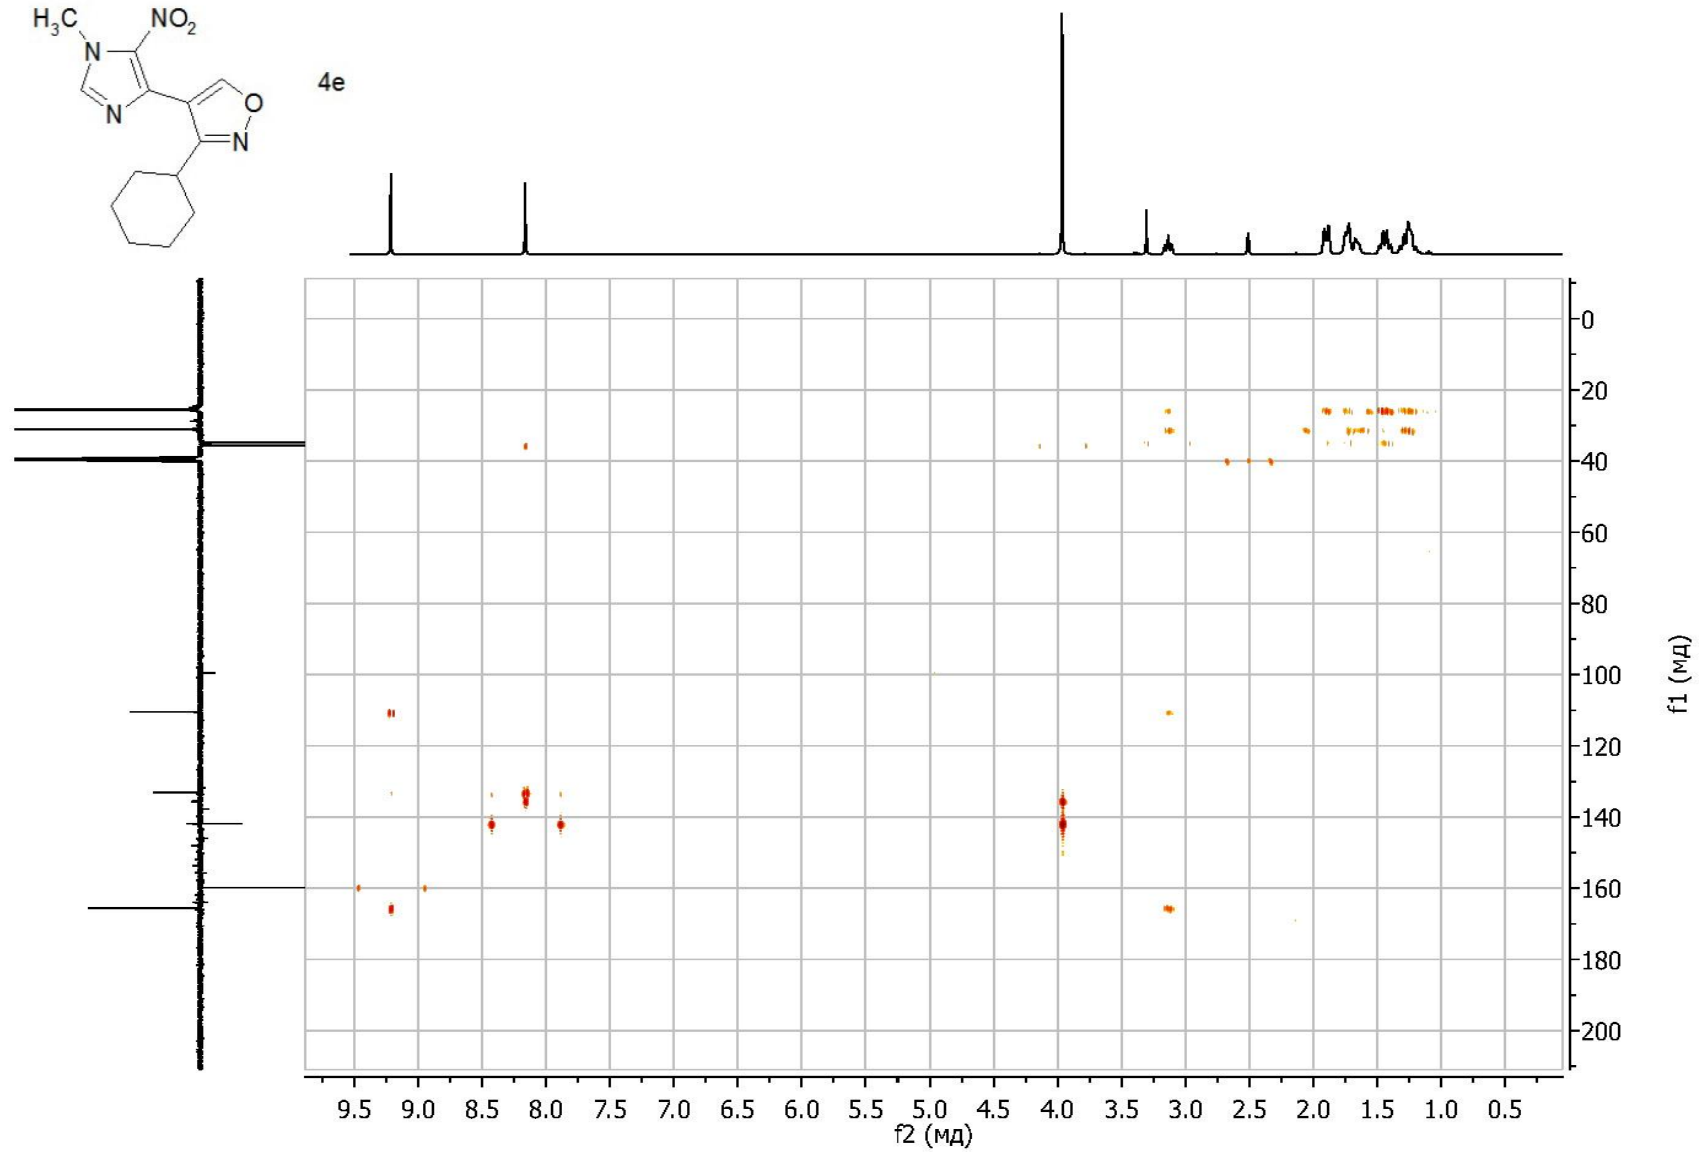

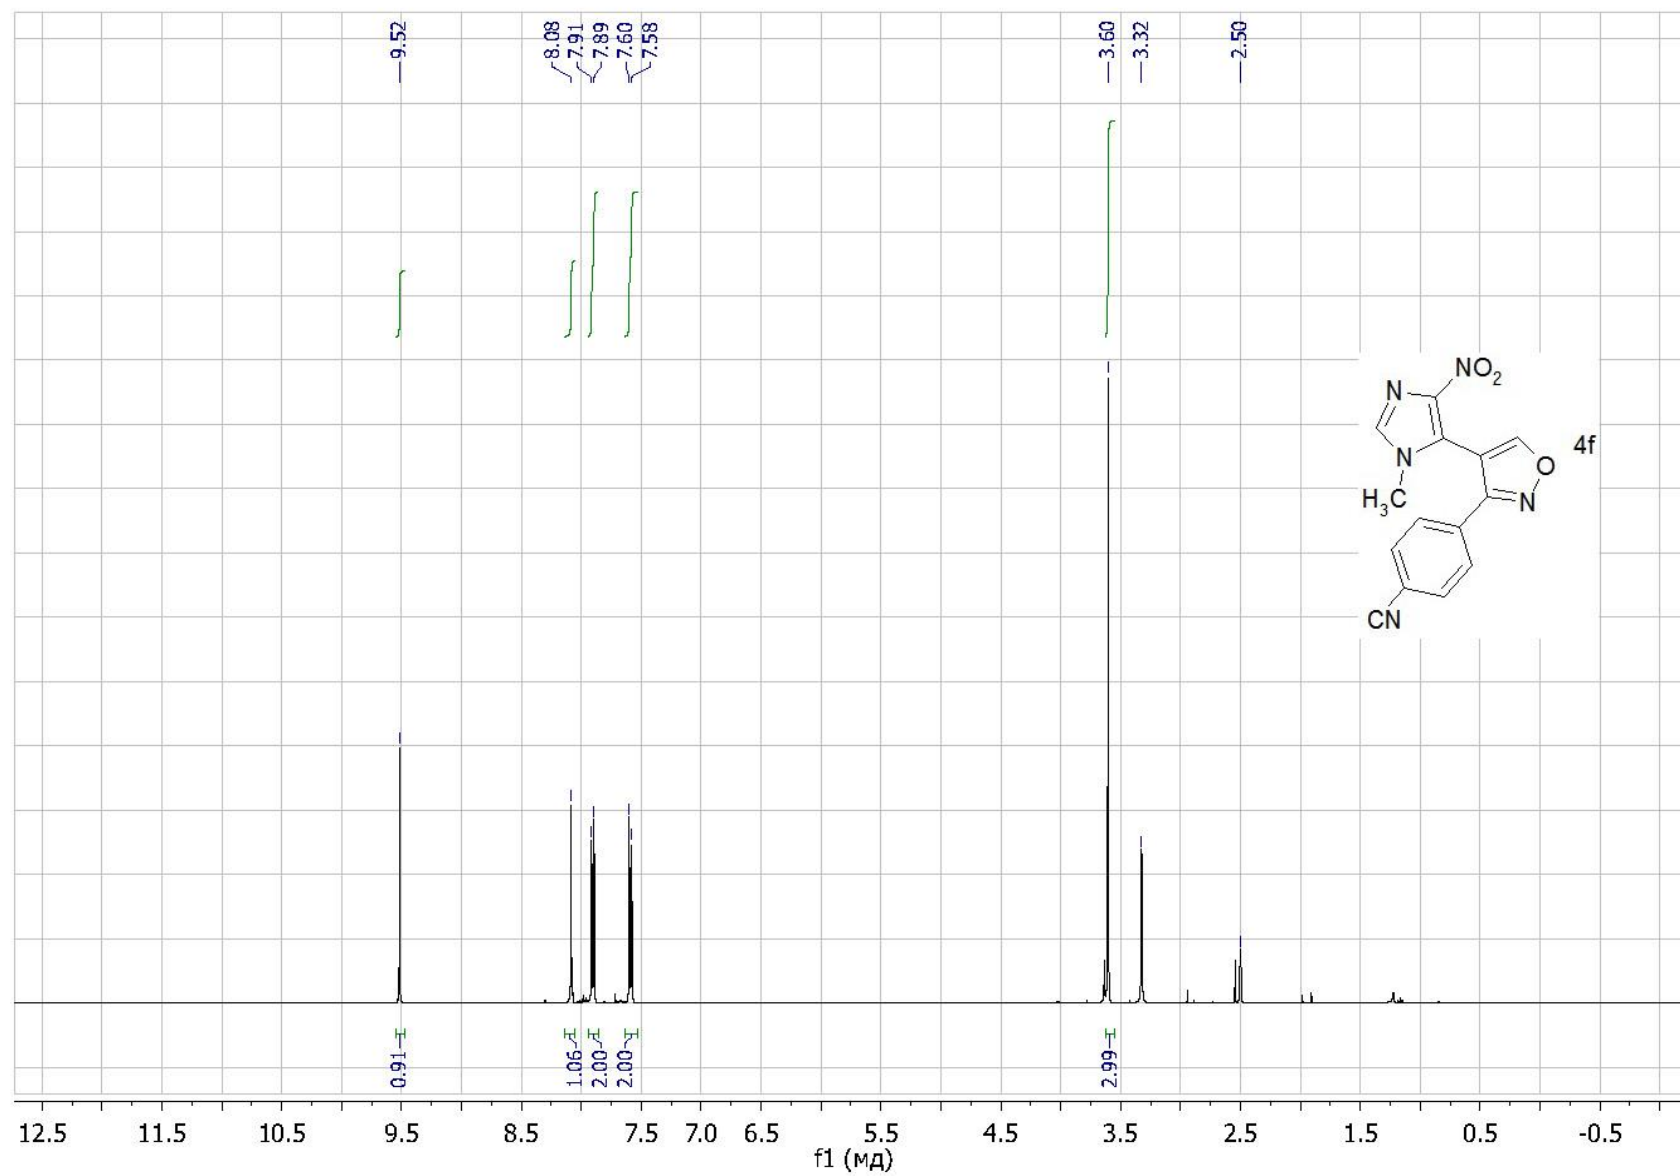

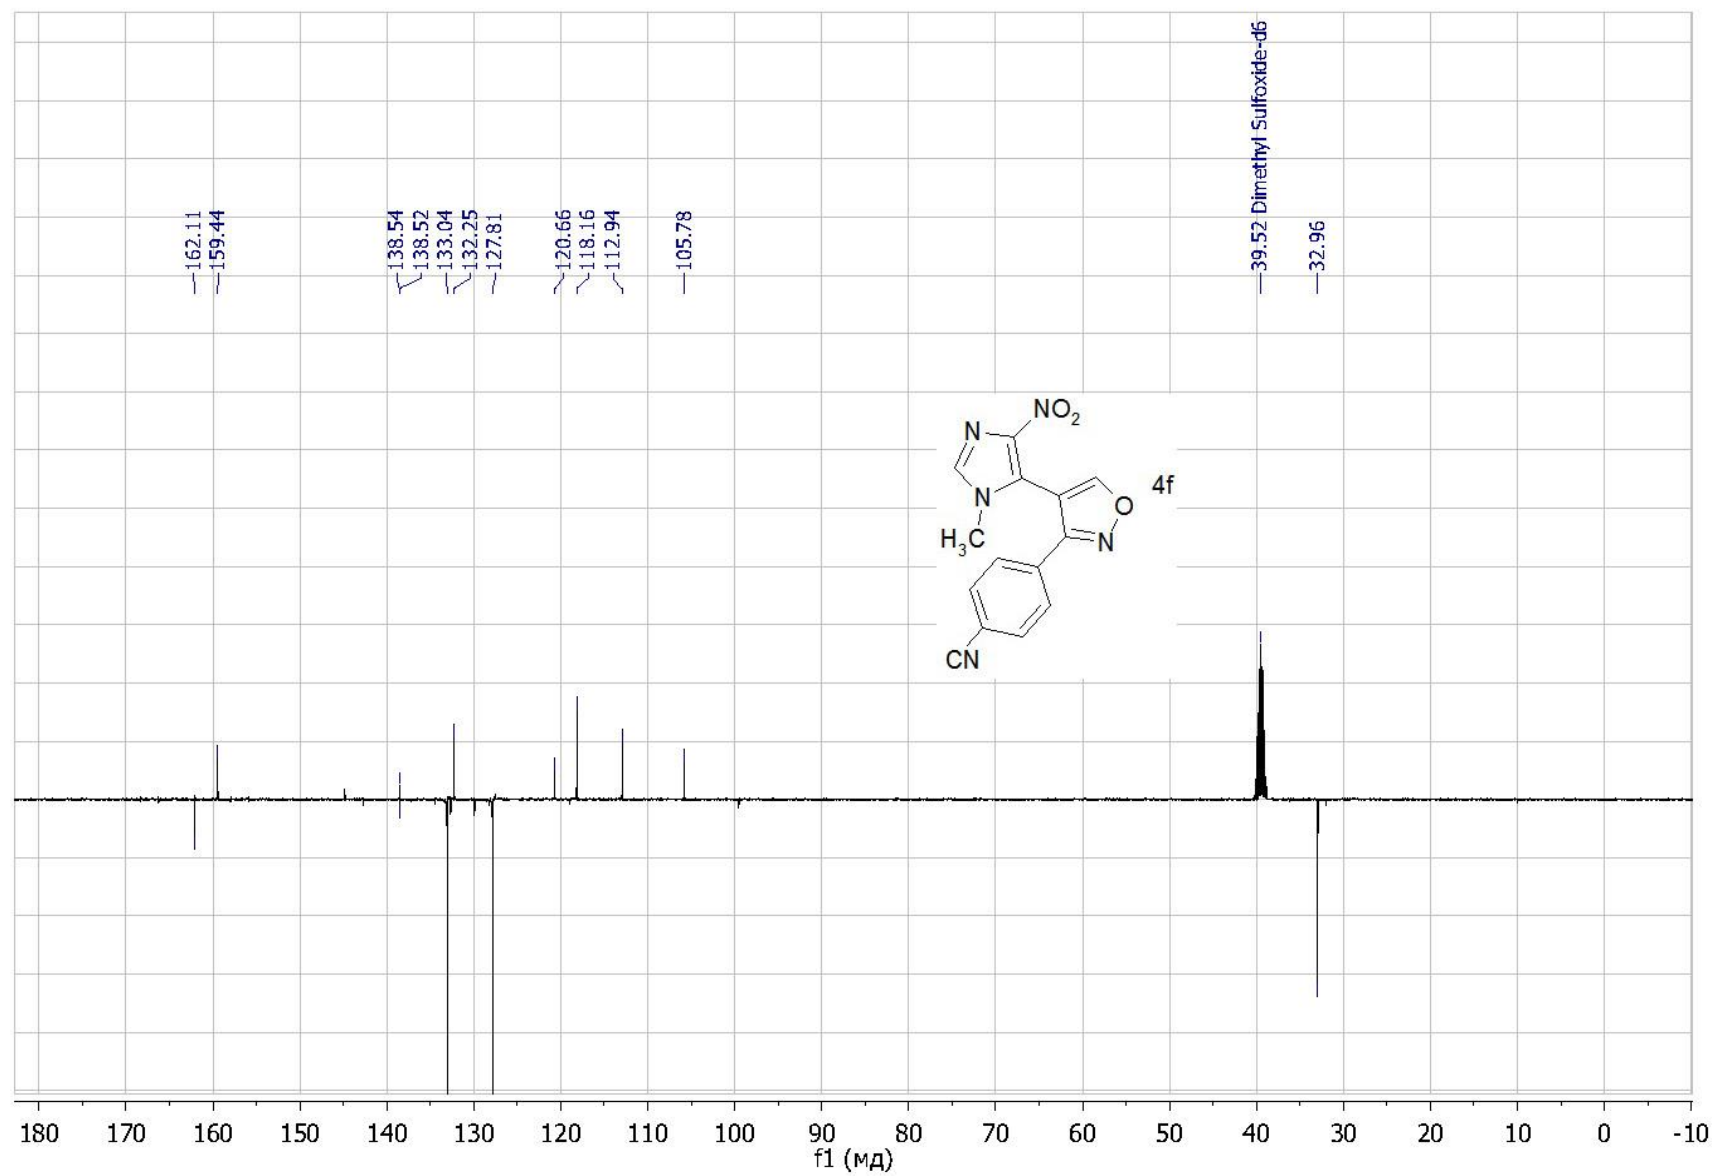

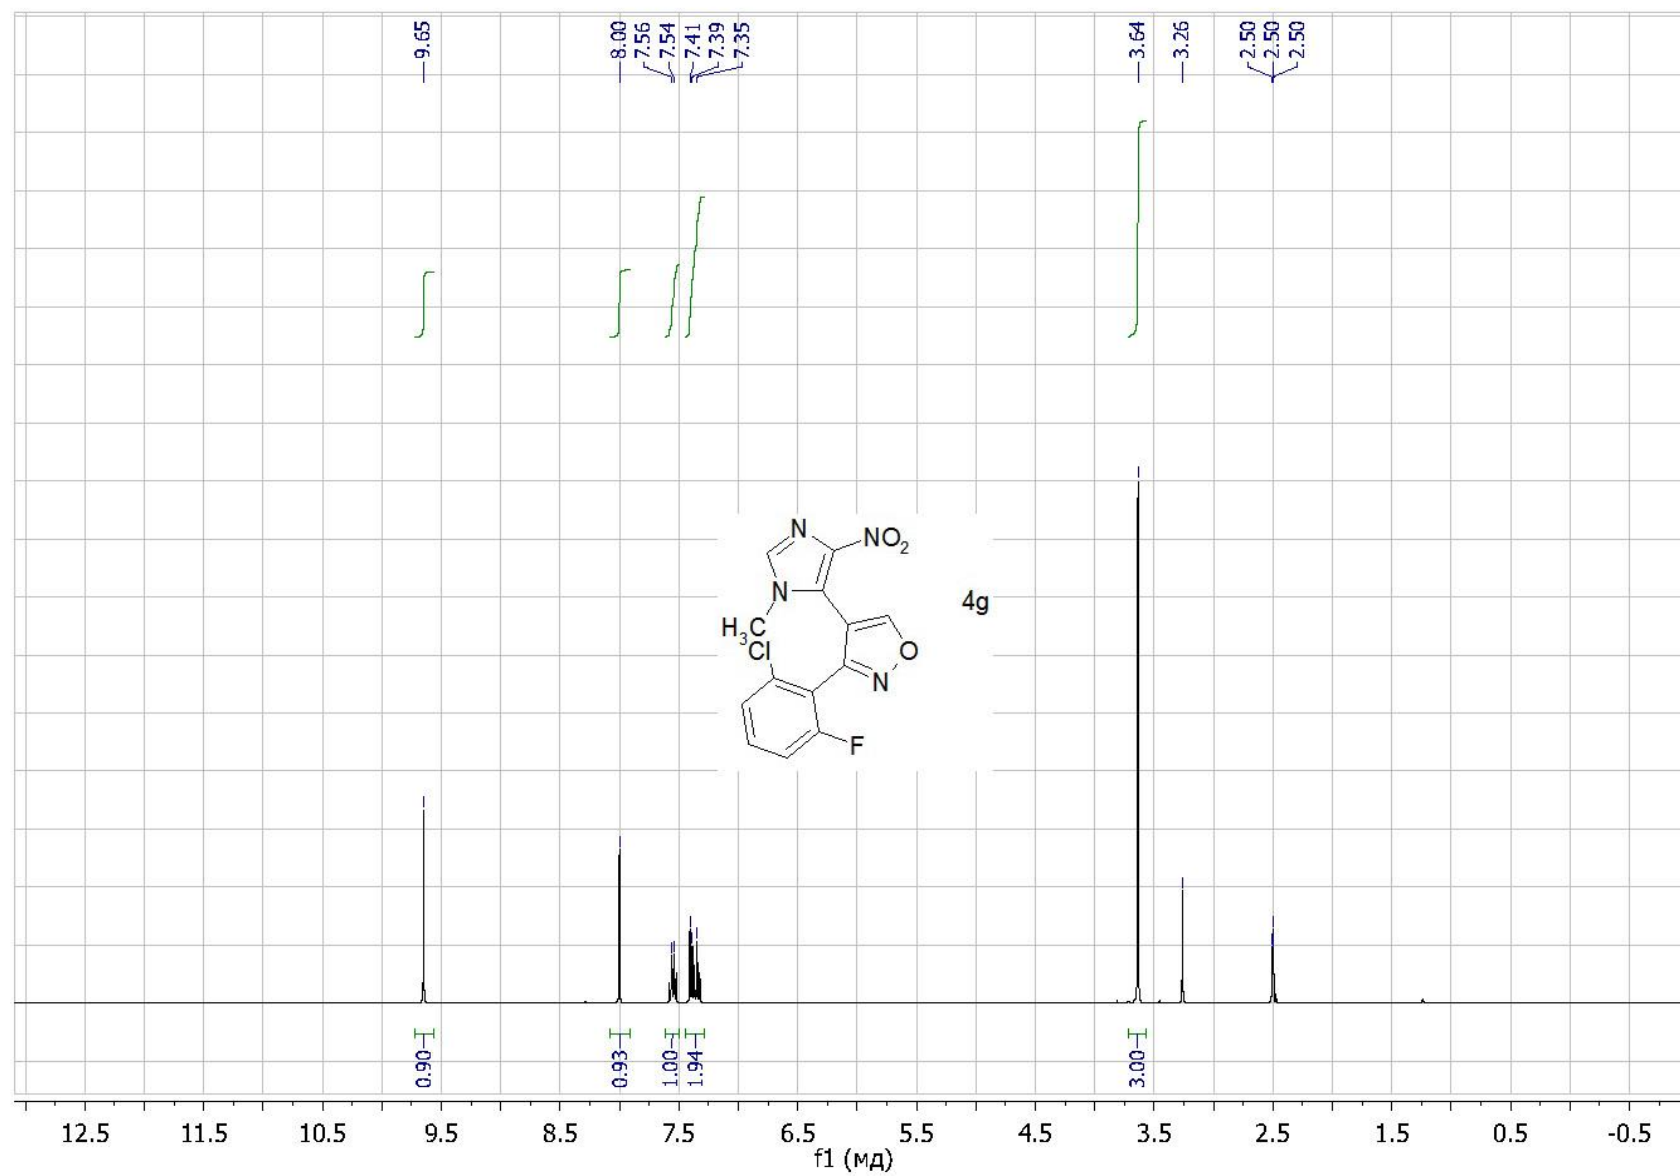

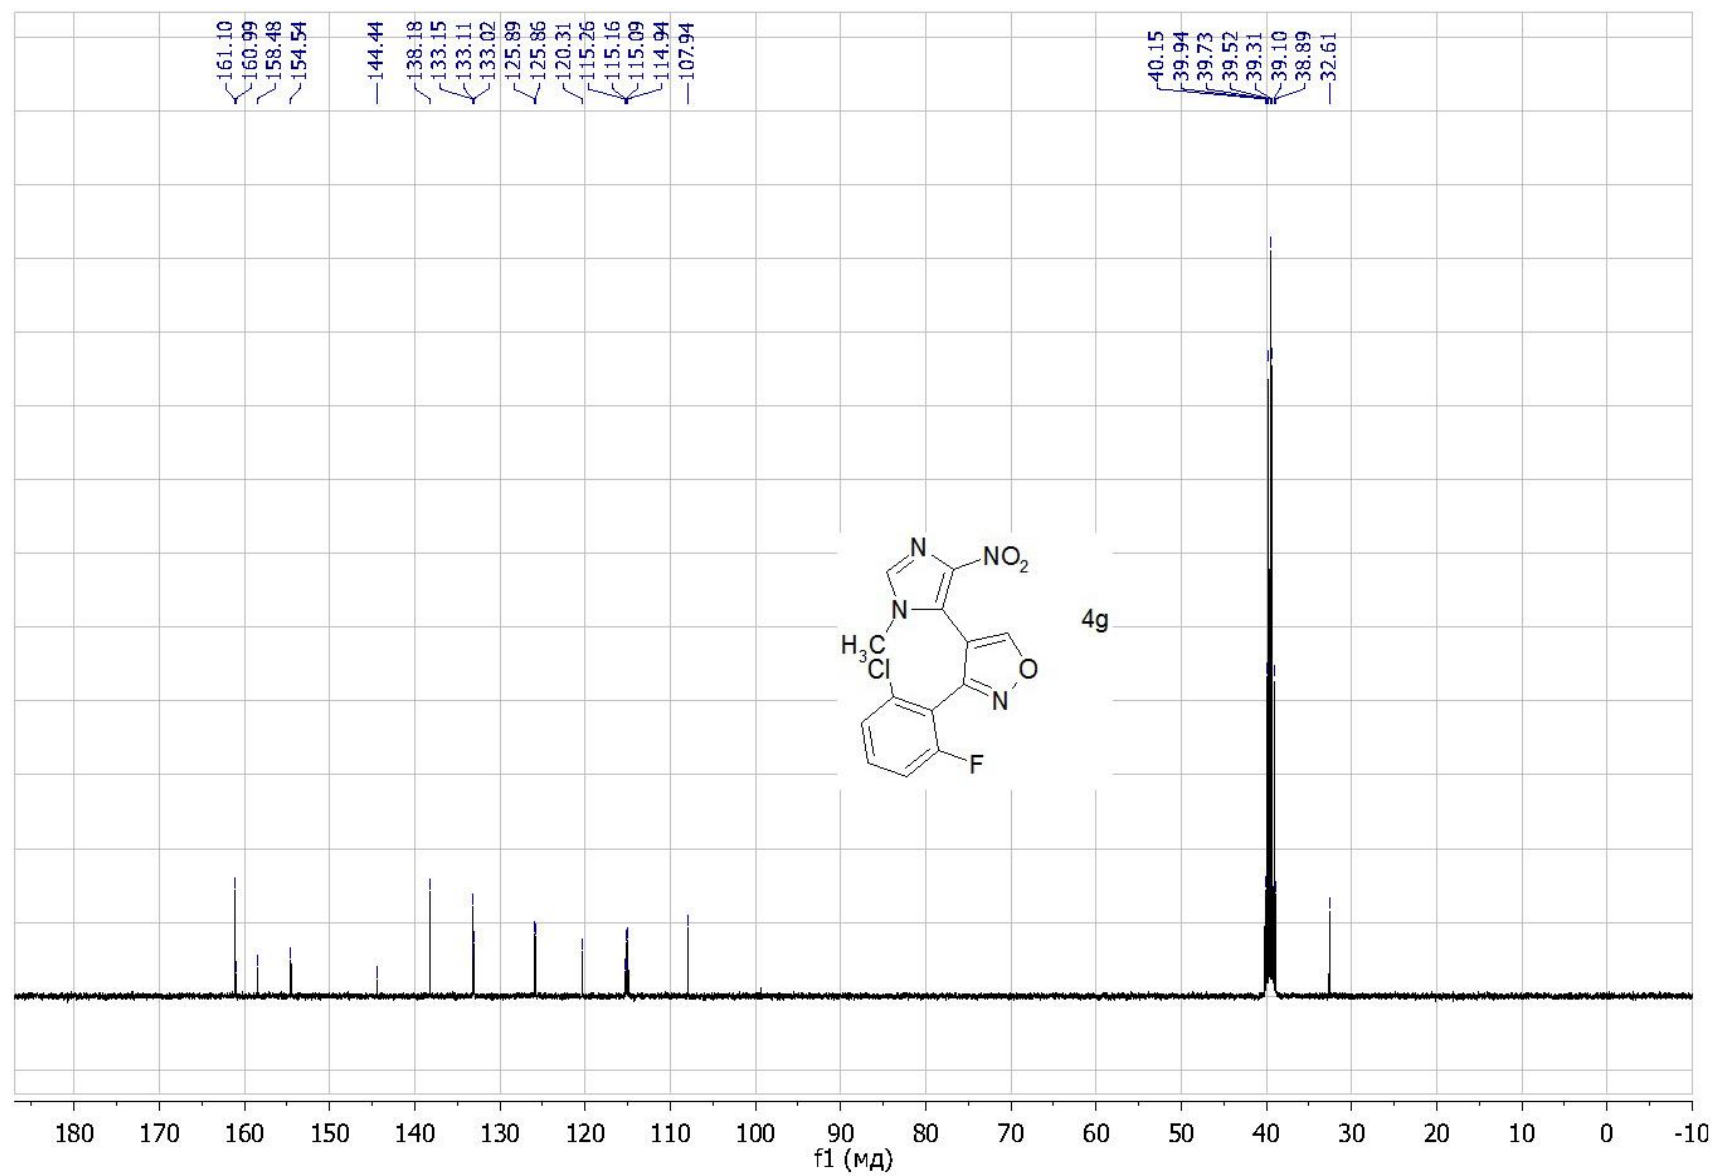

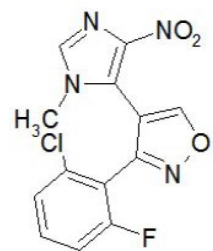

4g

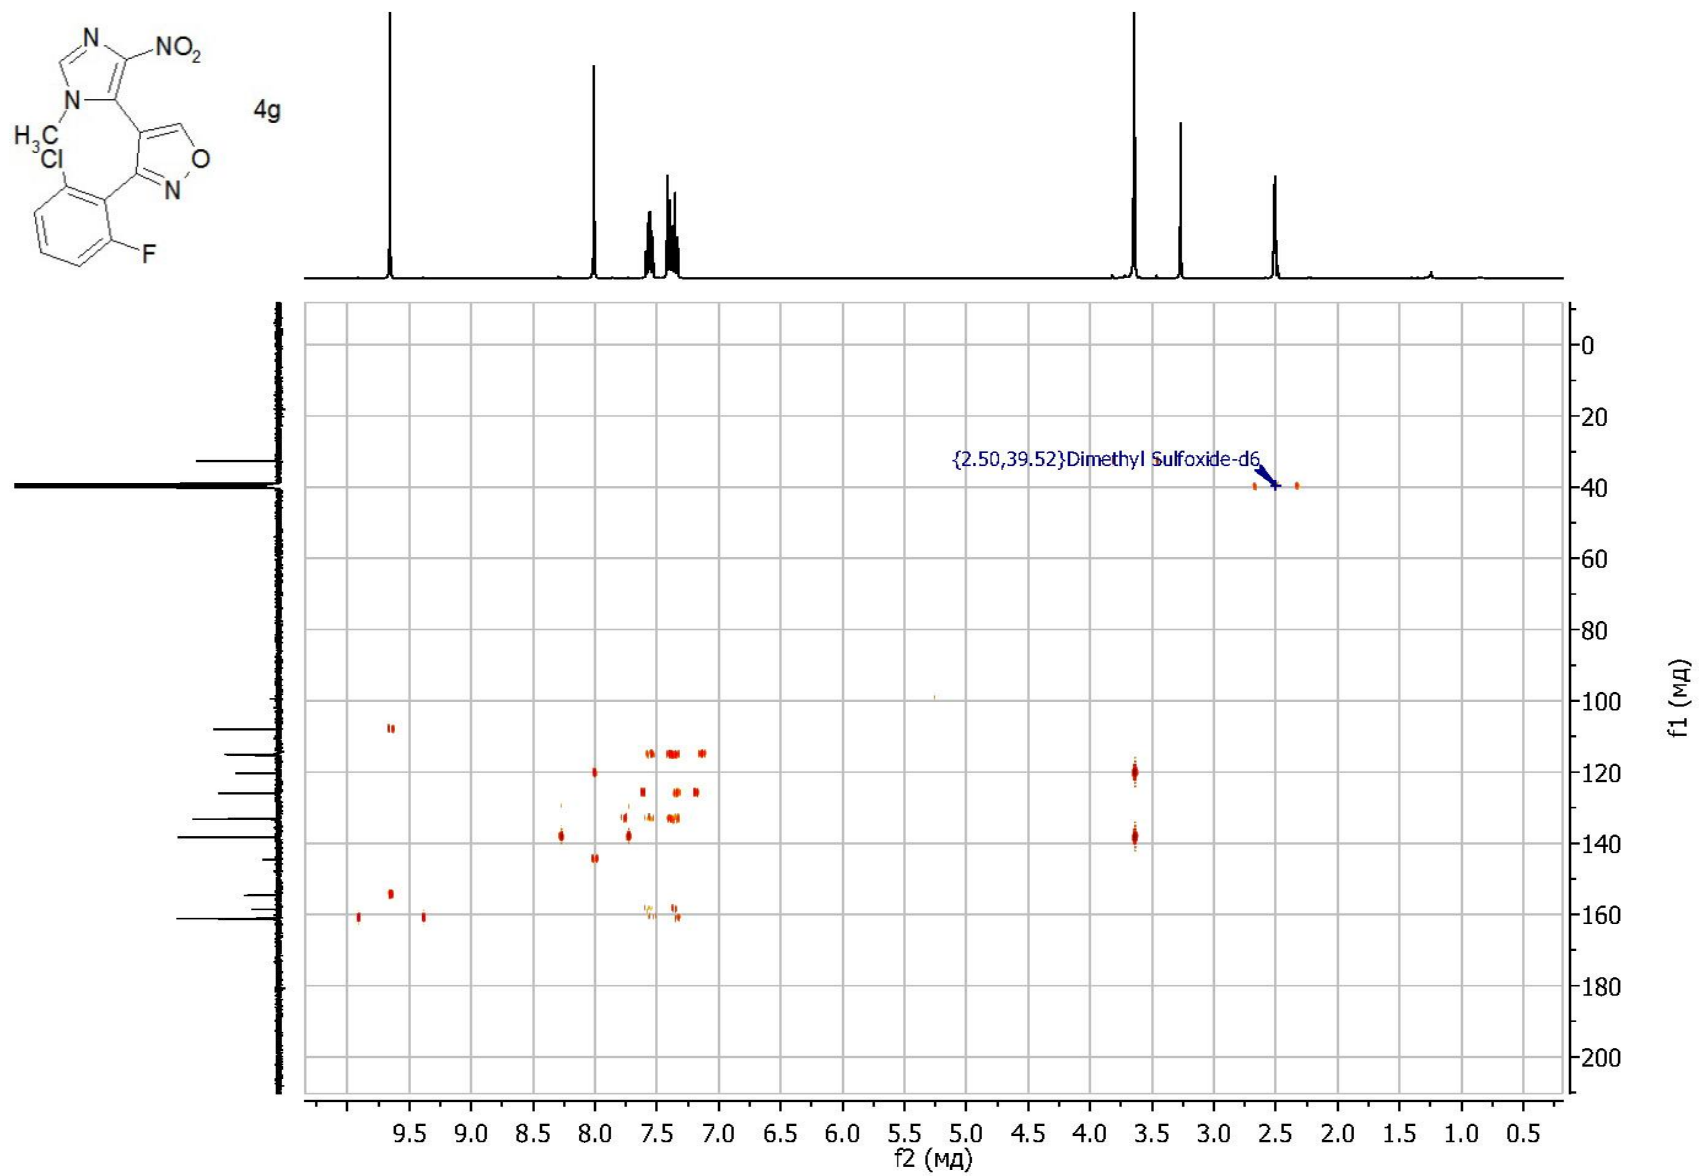

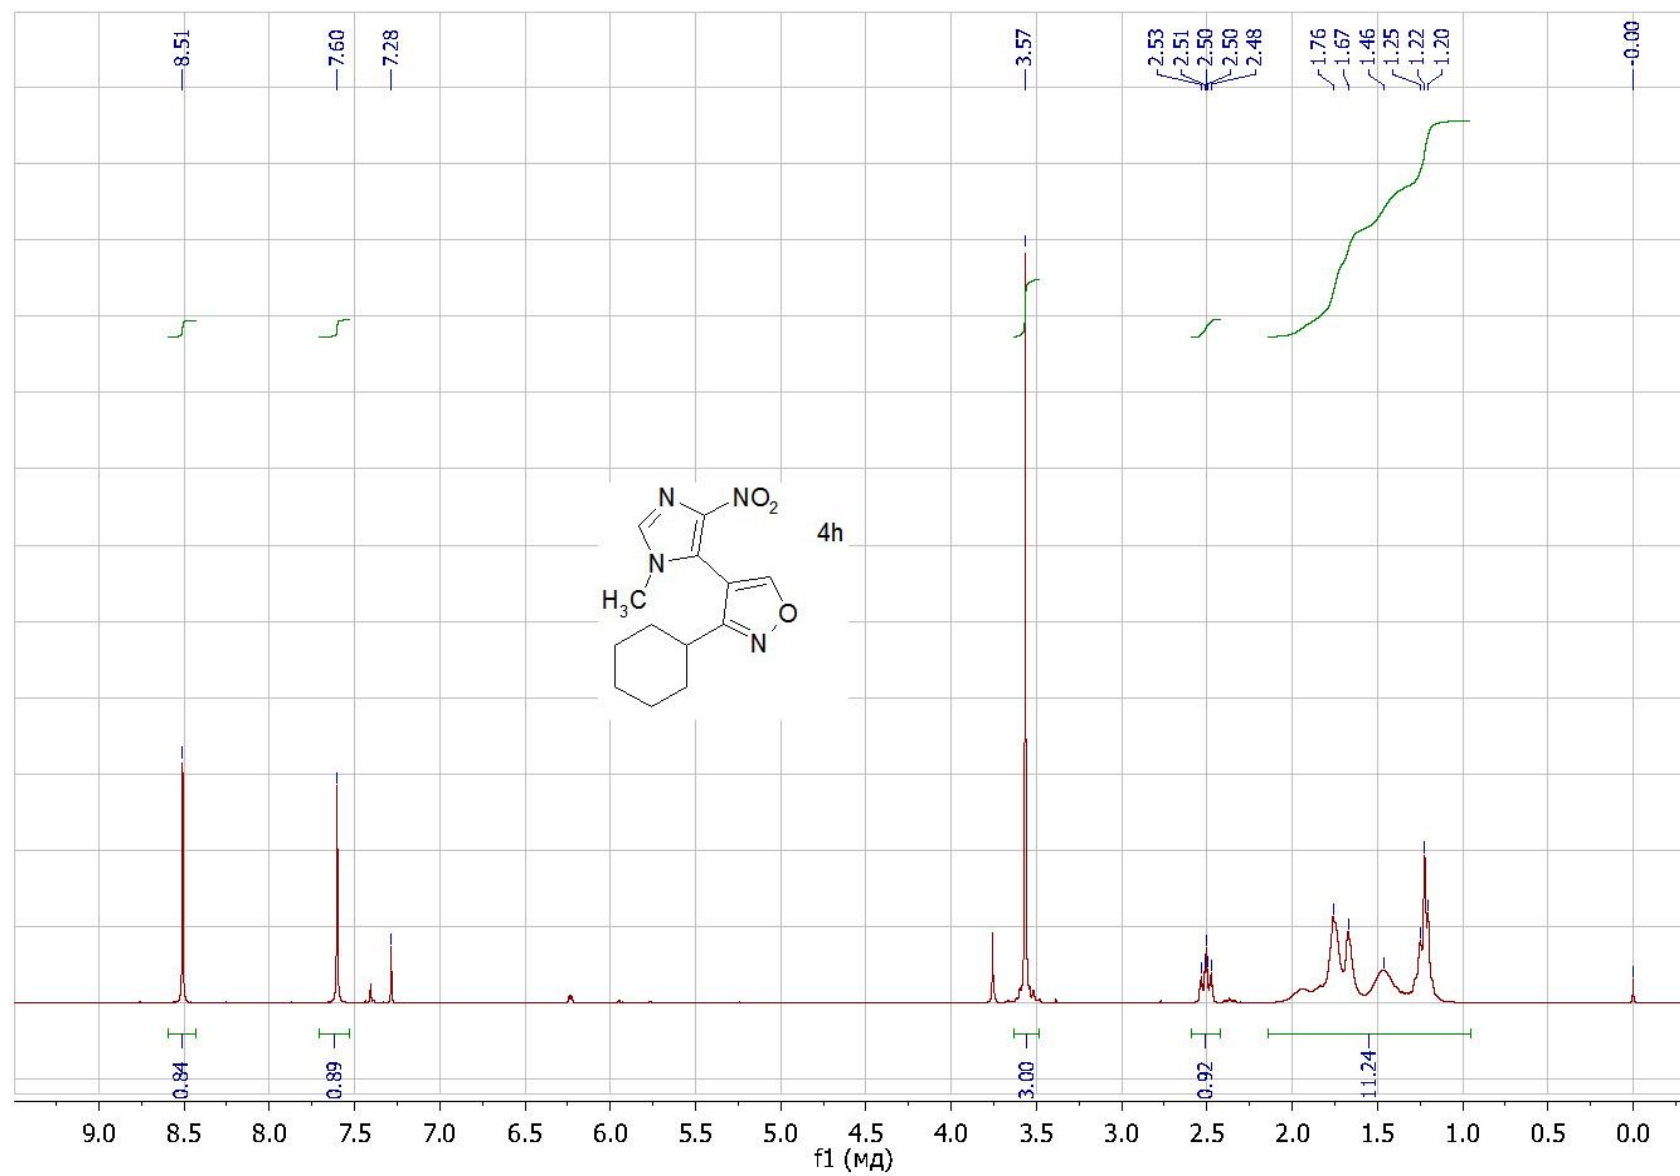

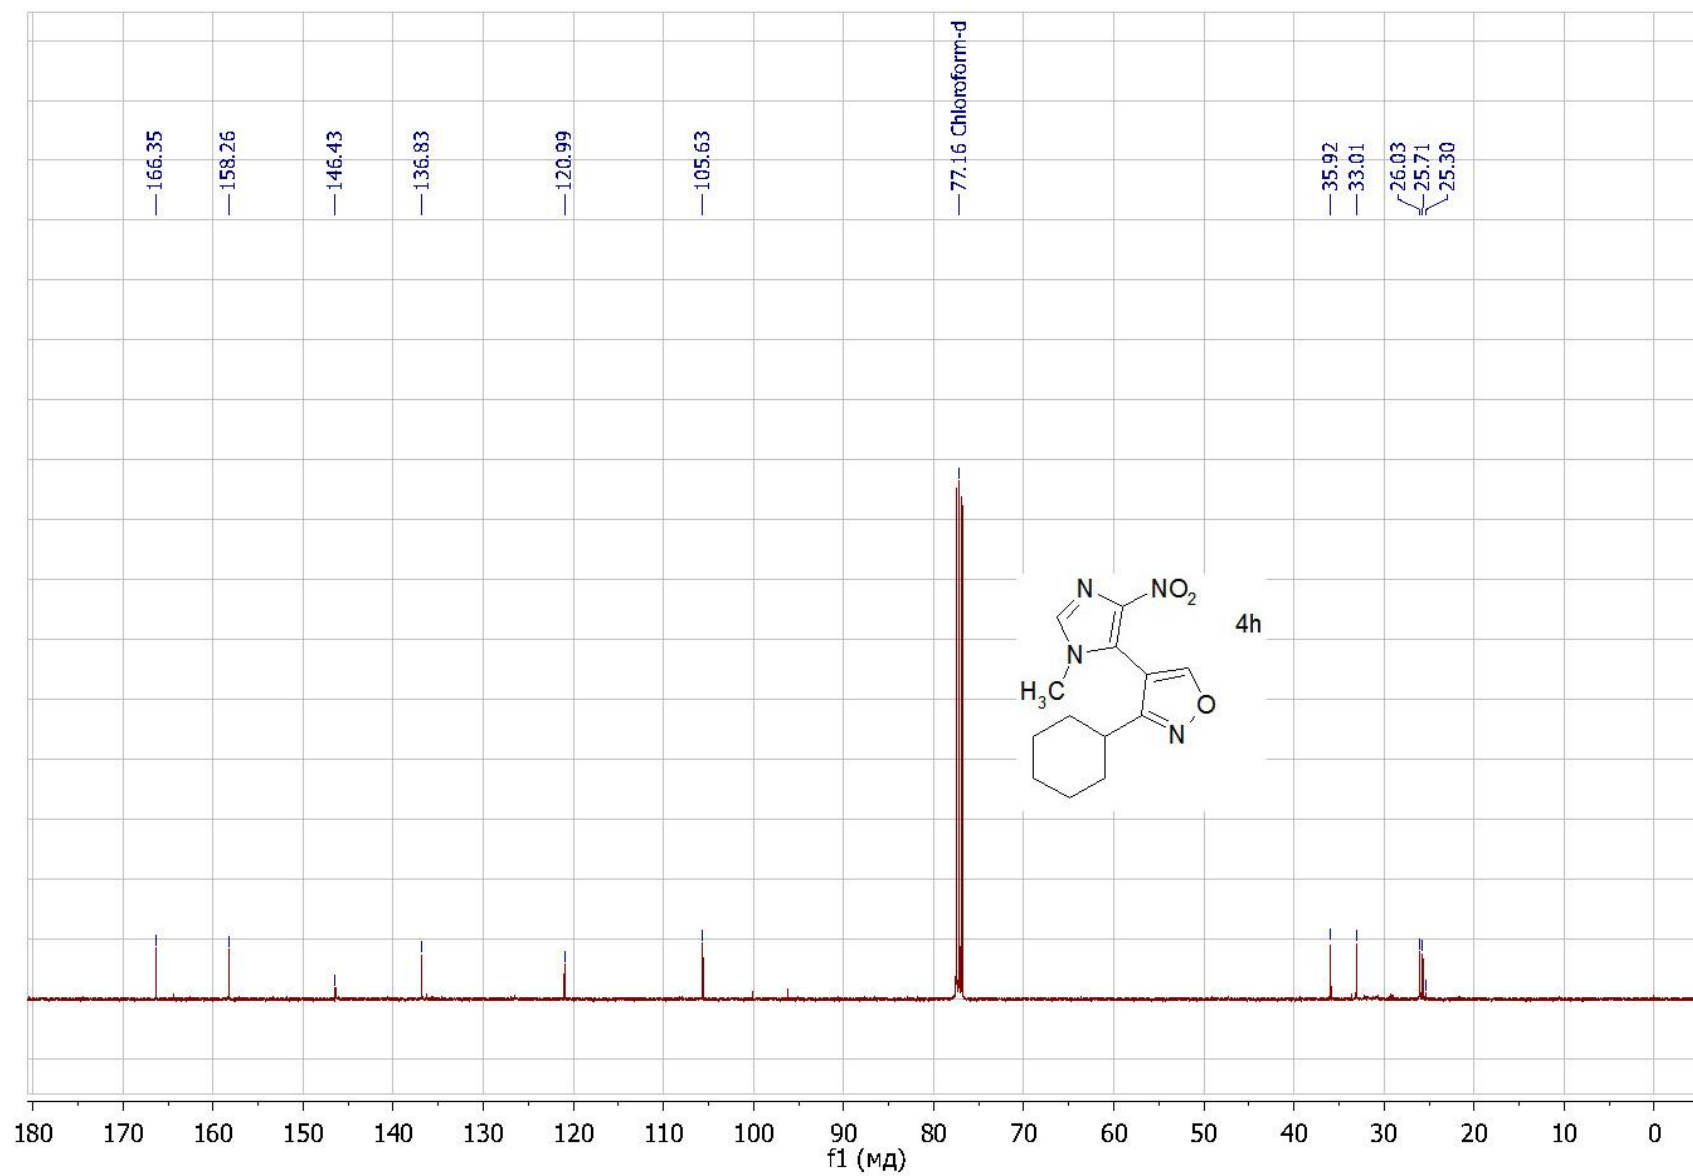

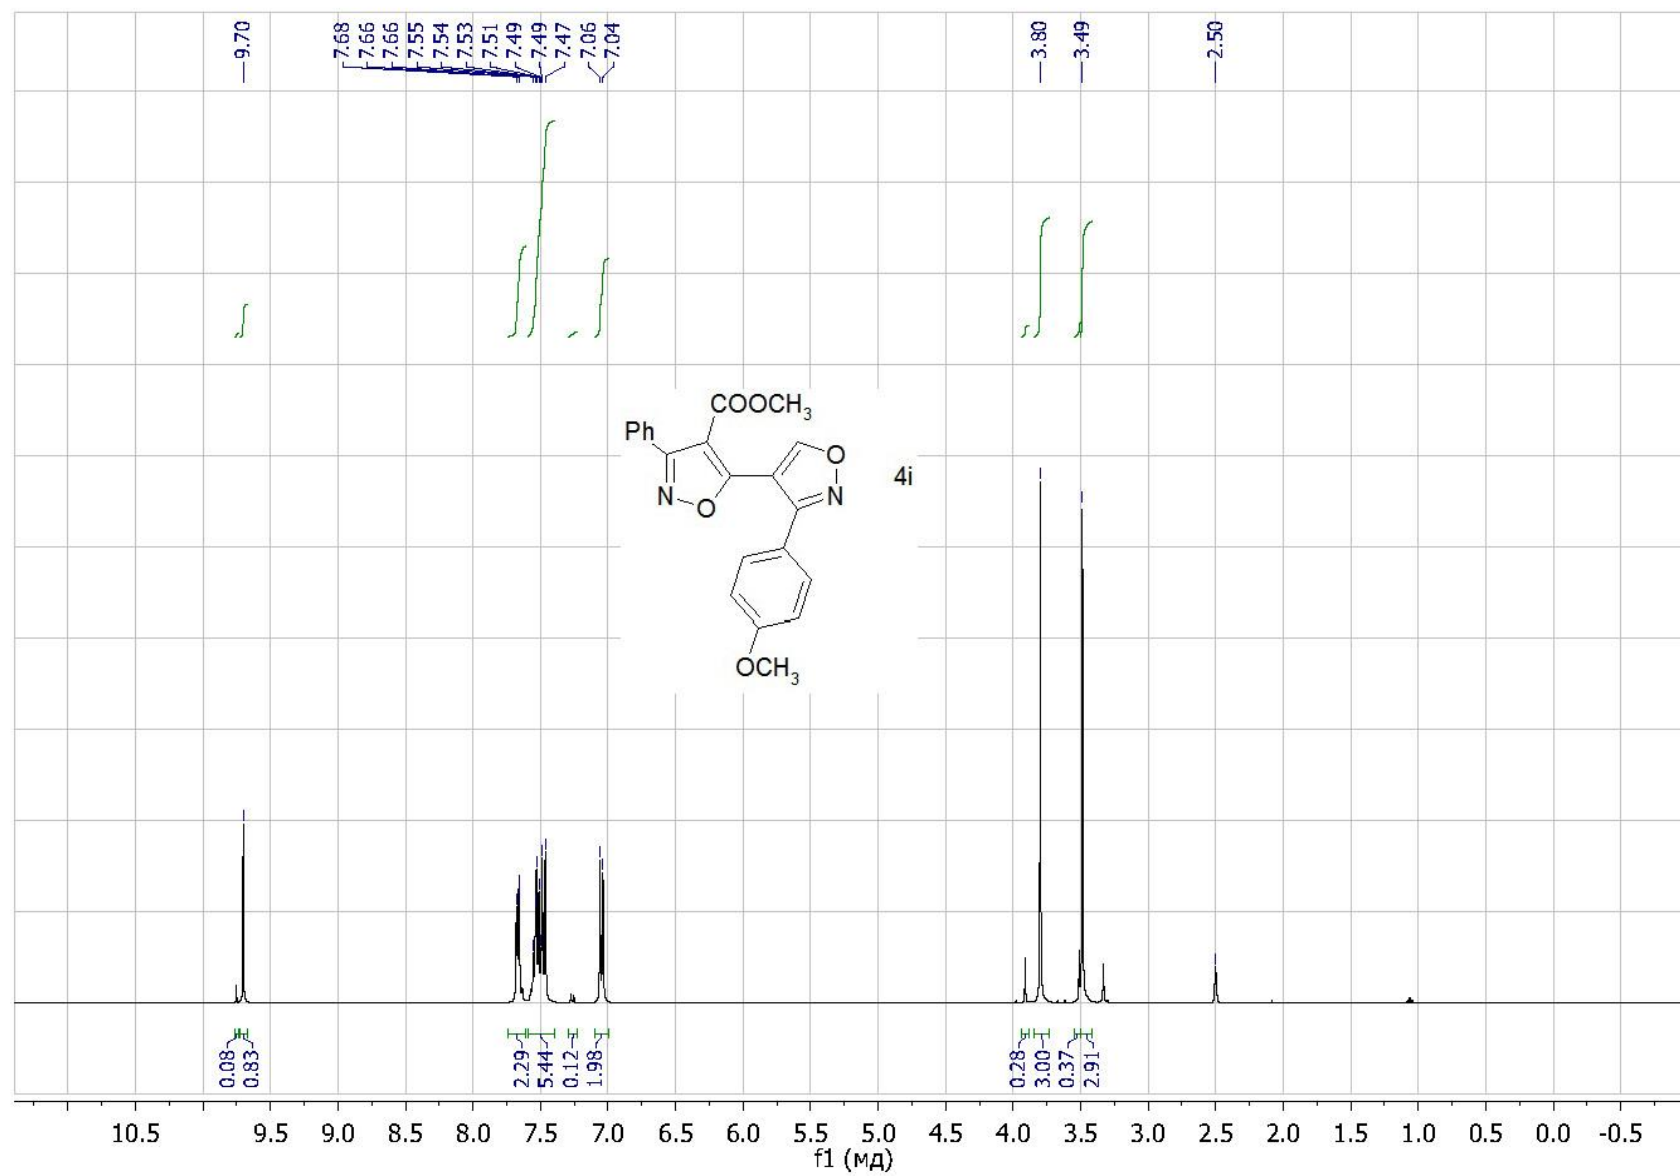

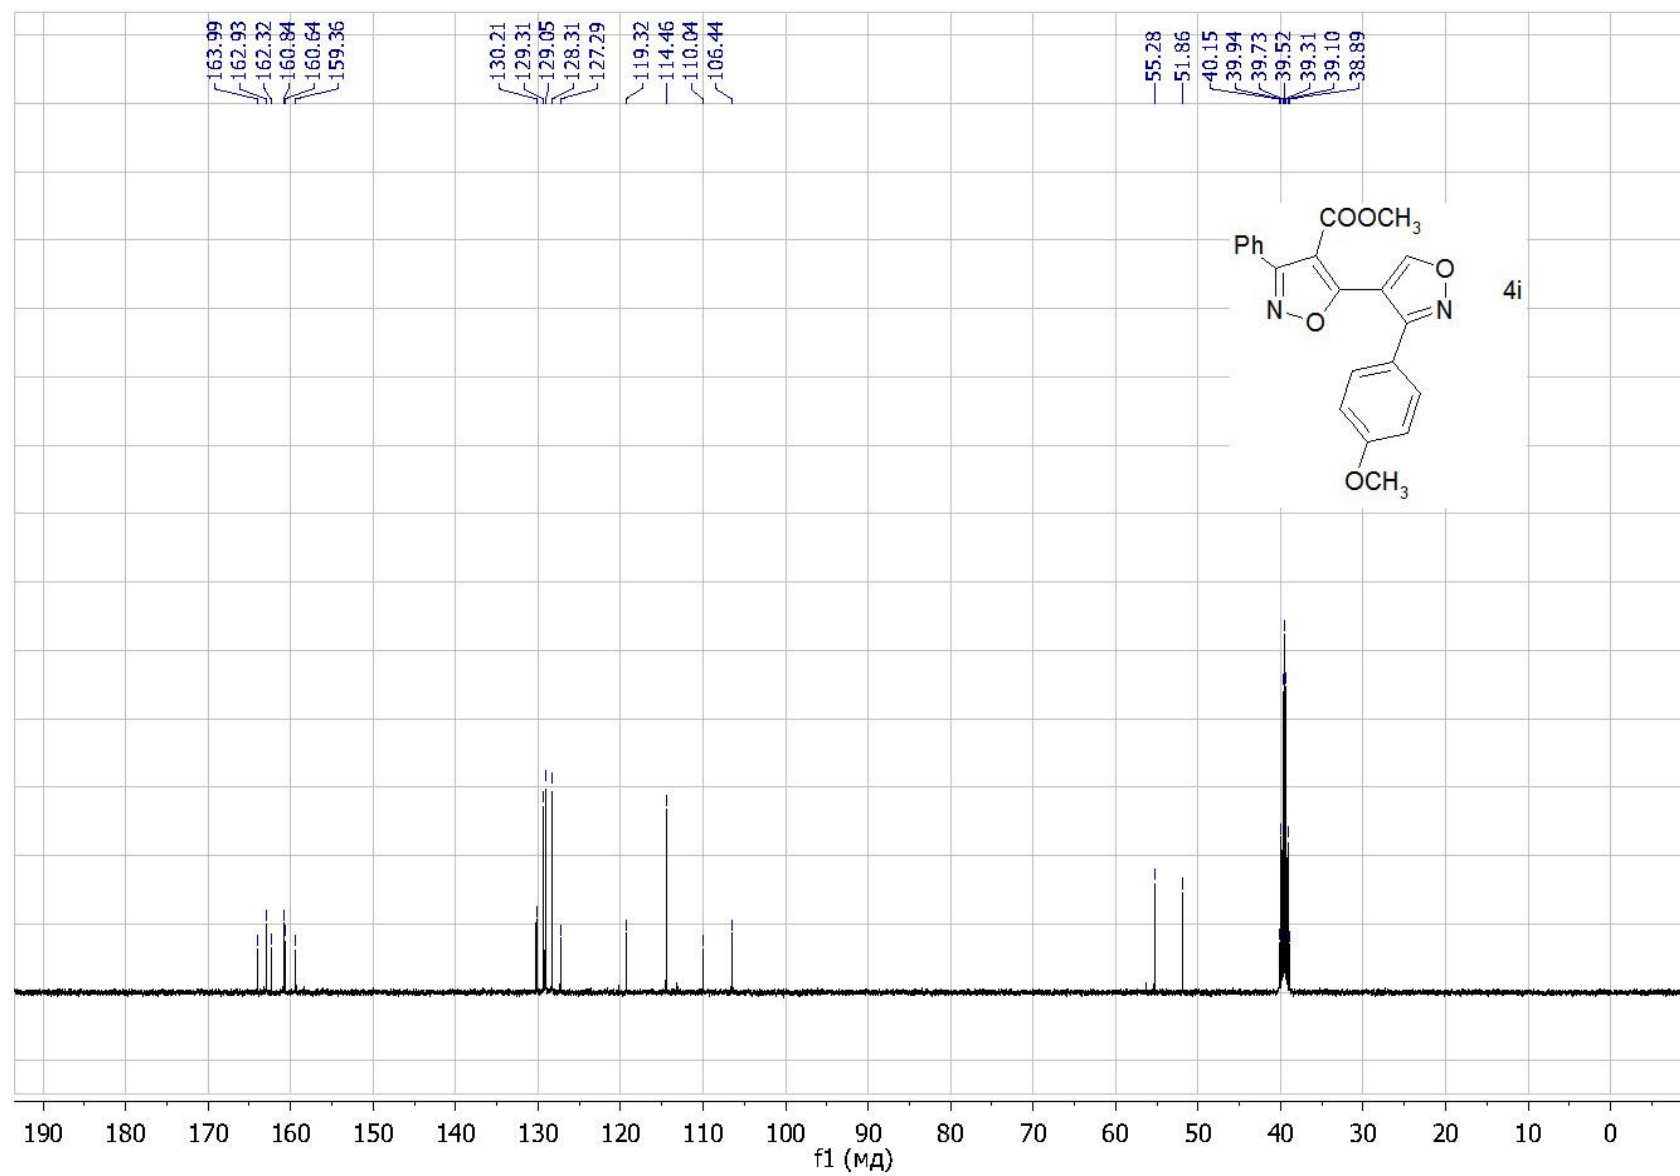

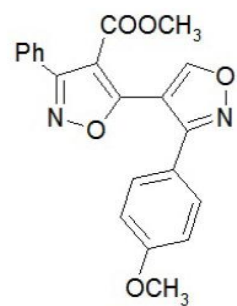

4i

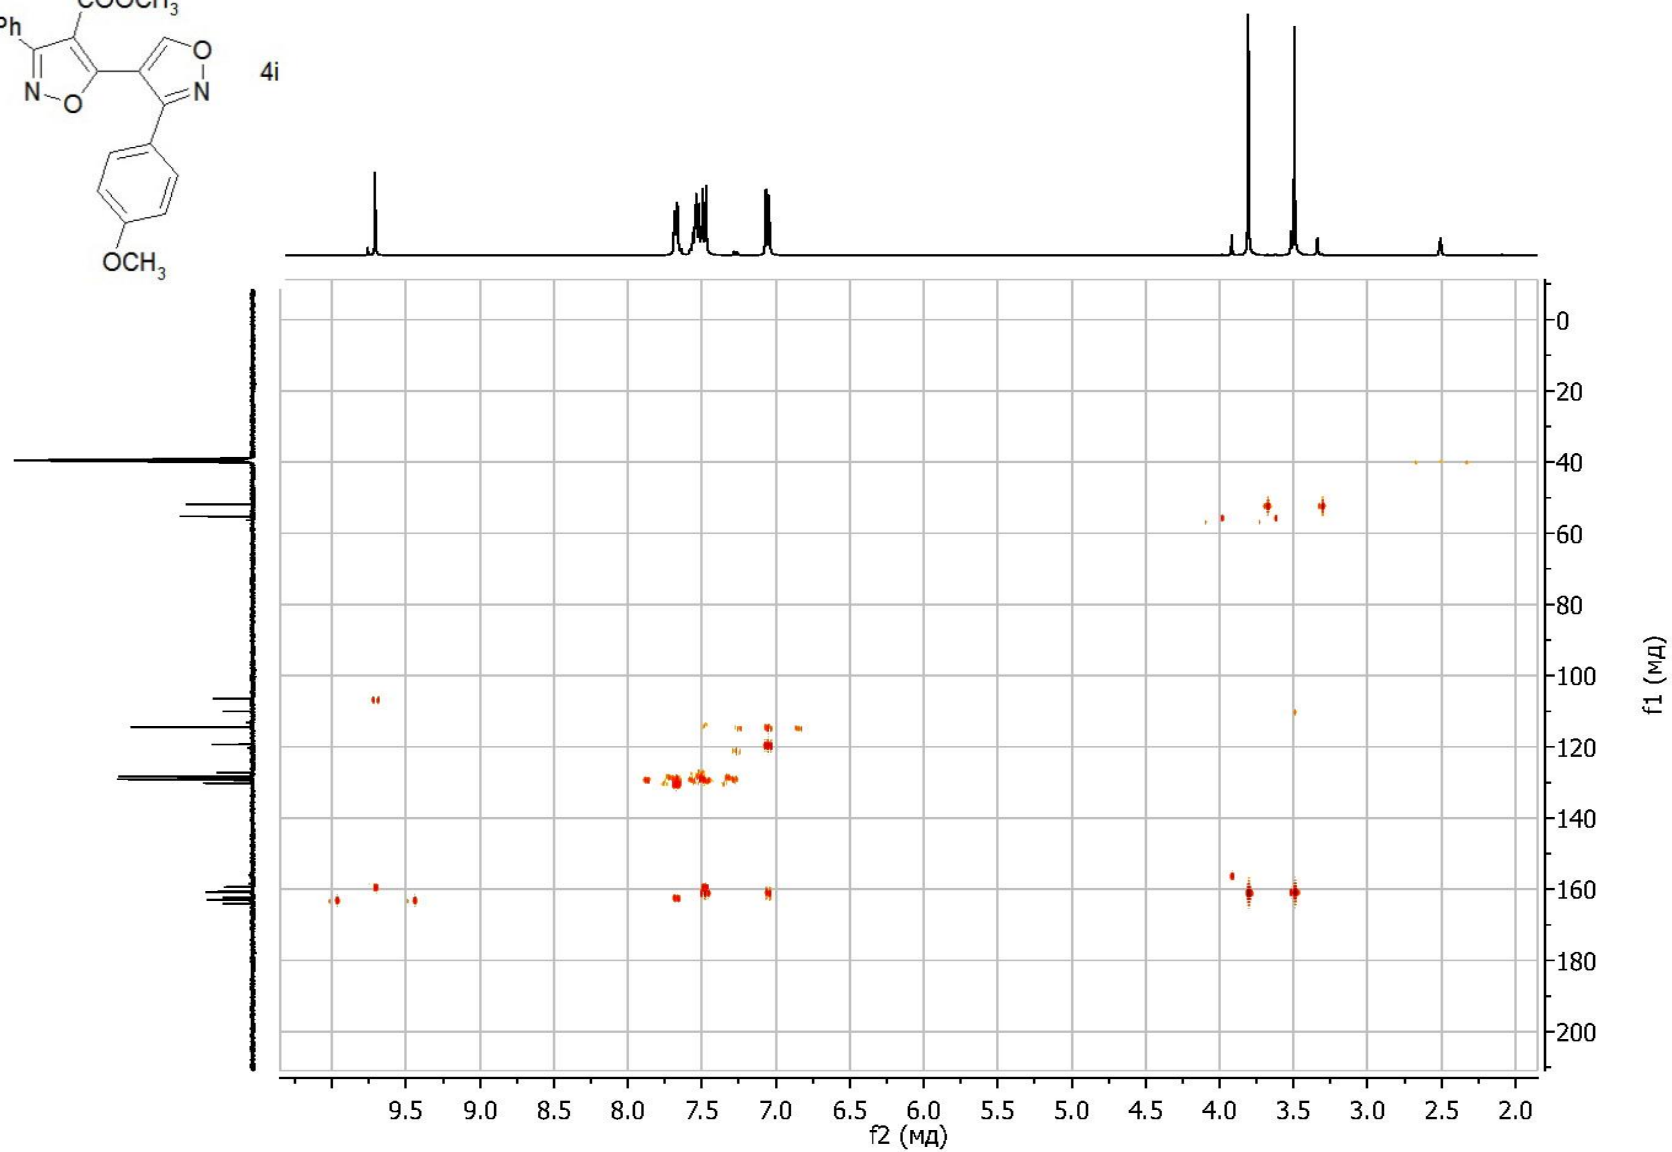

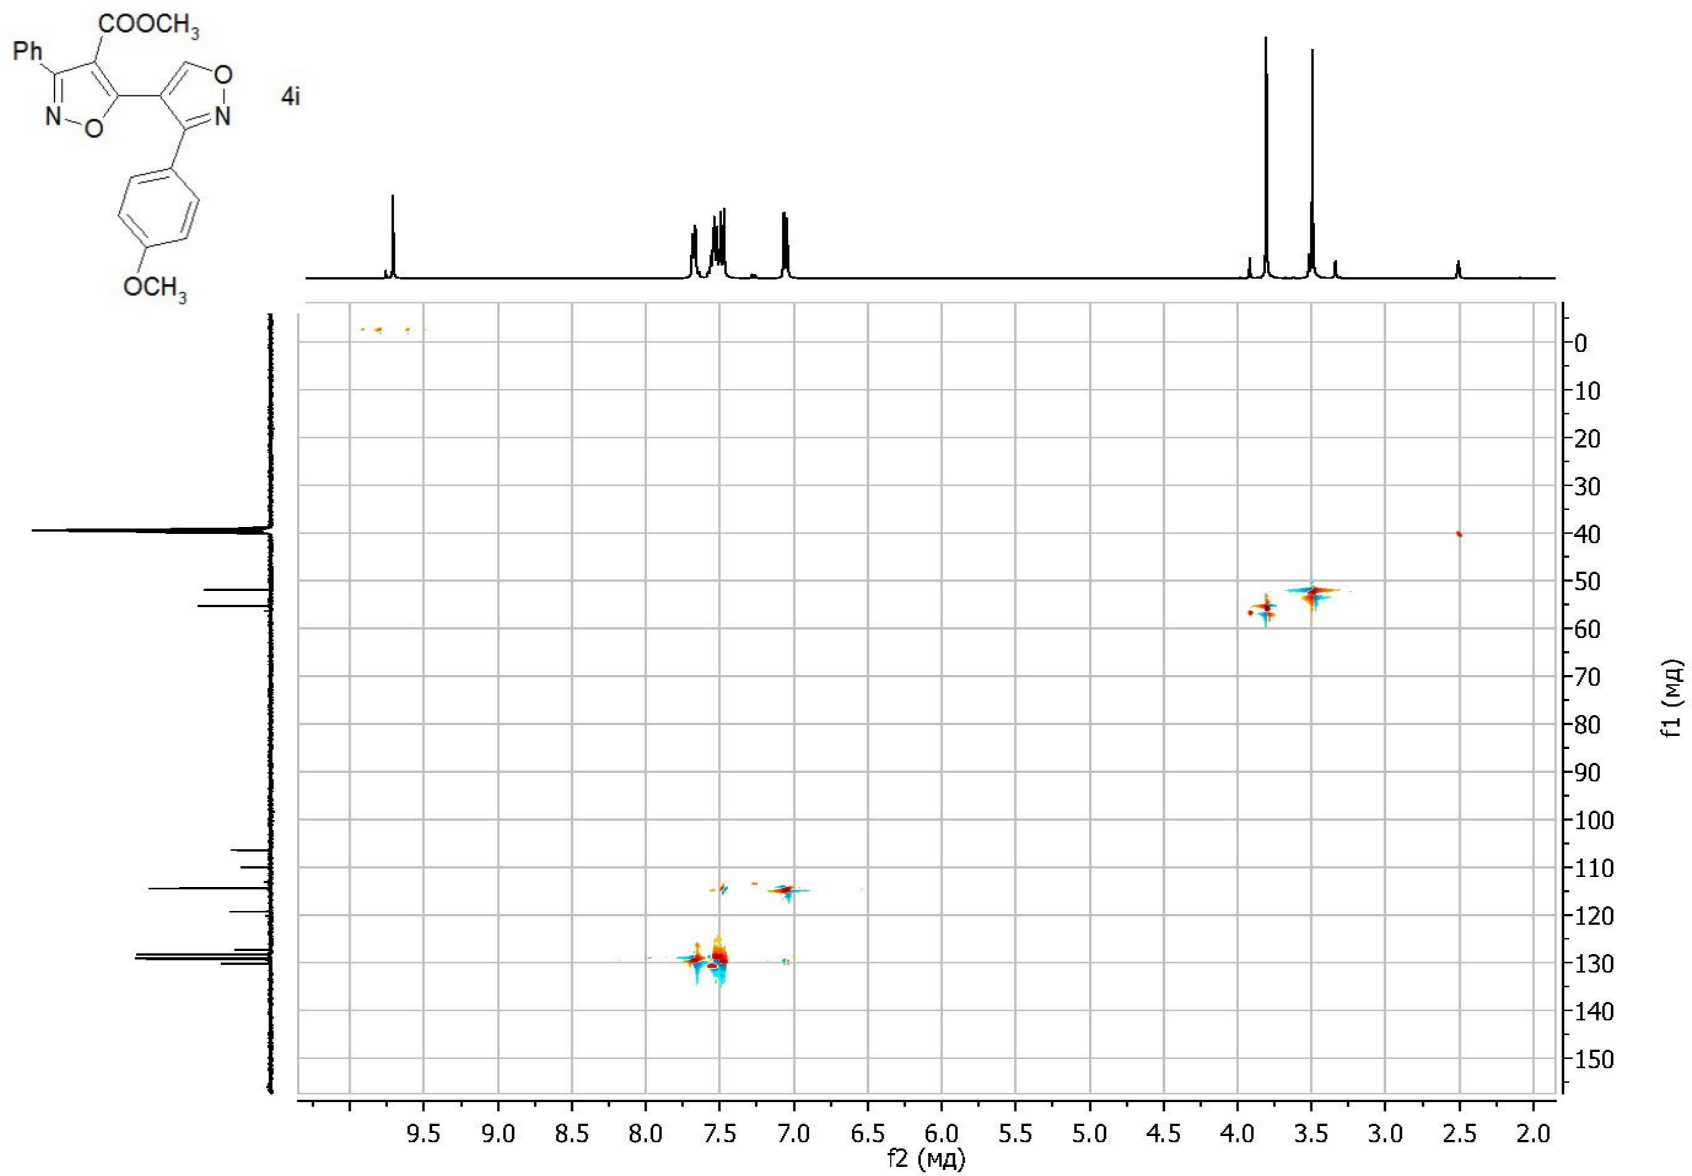

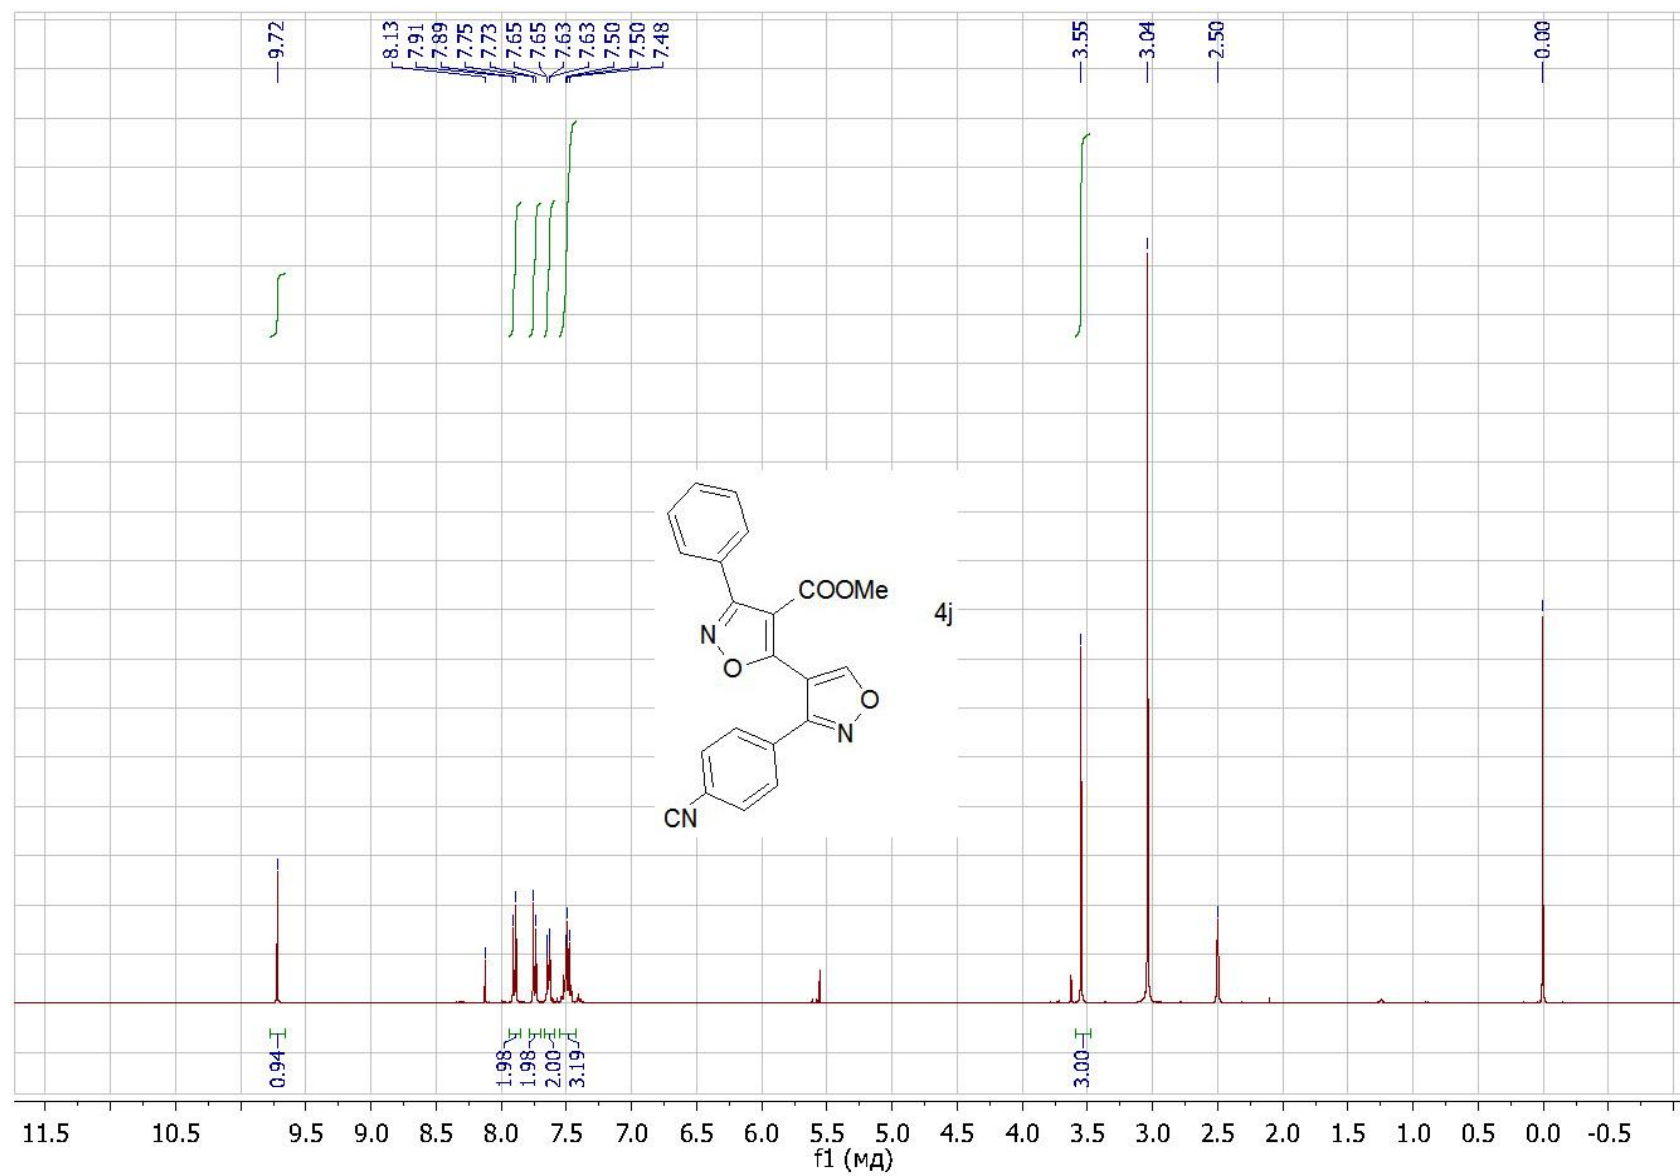

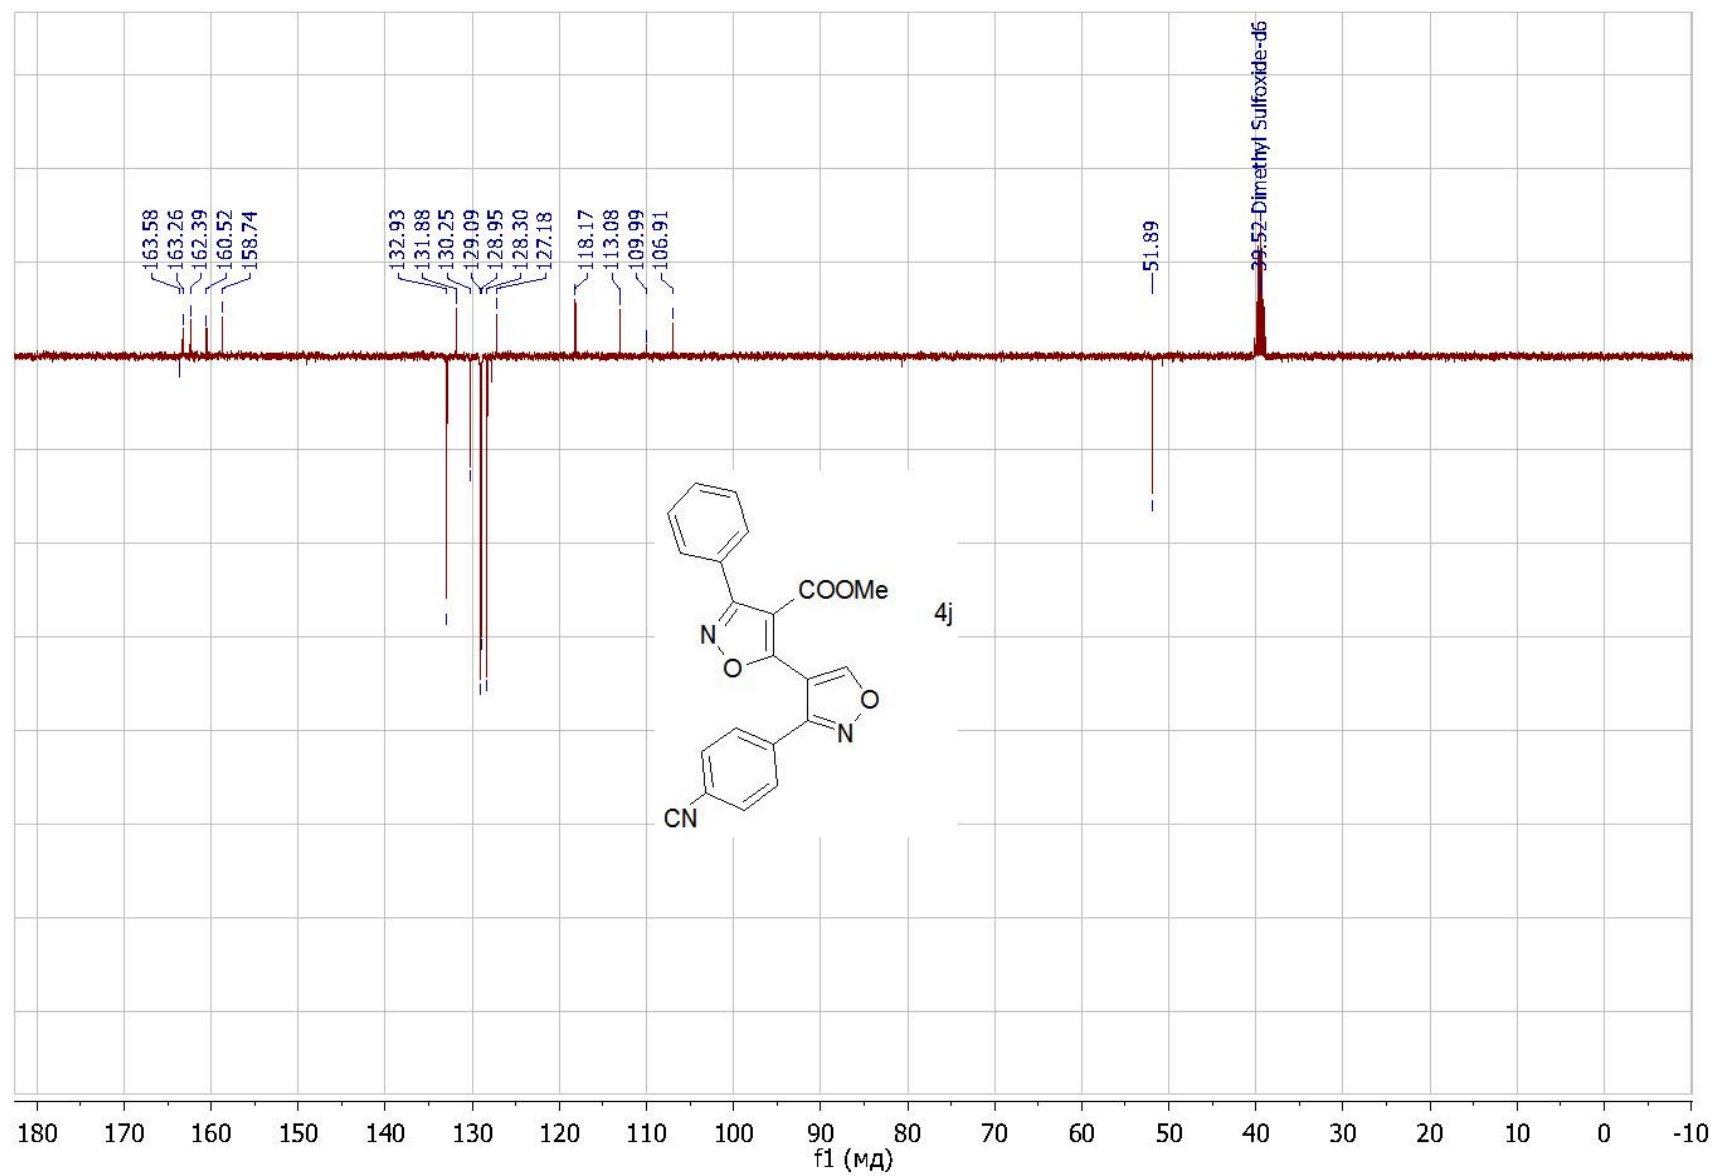

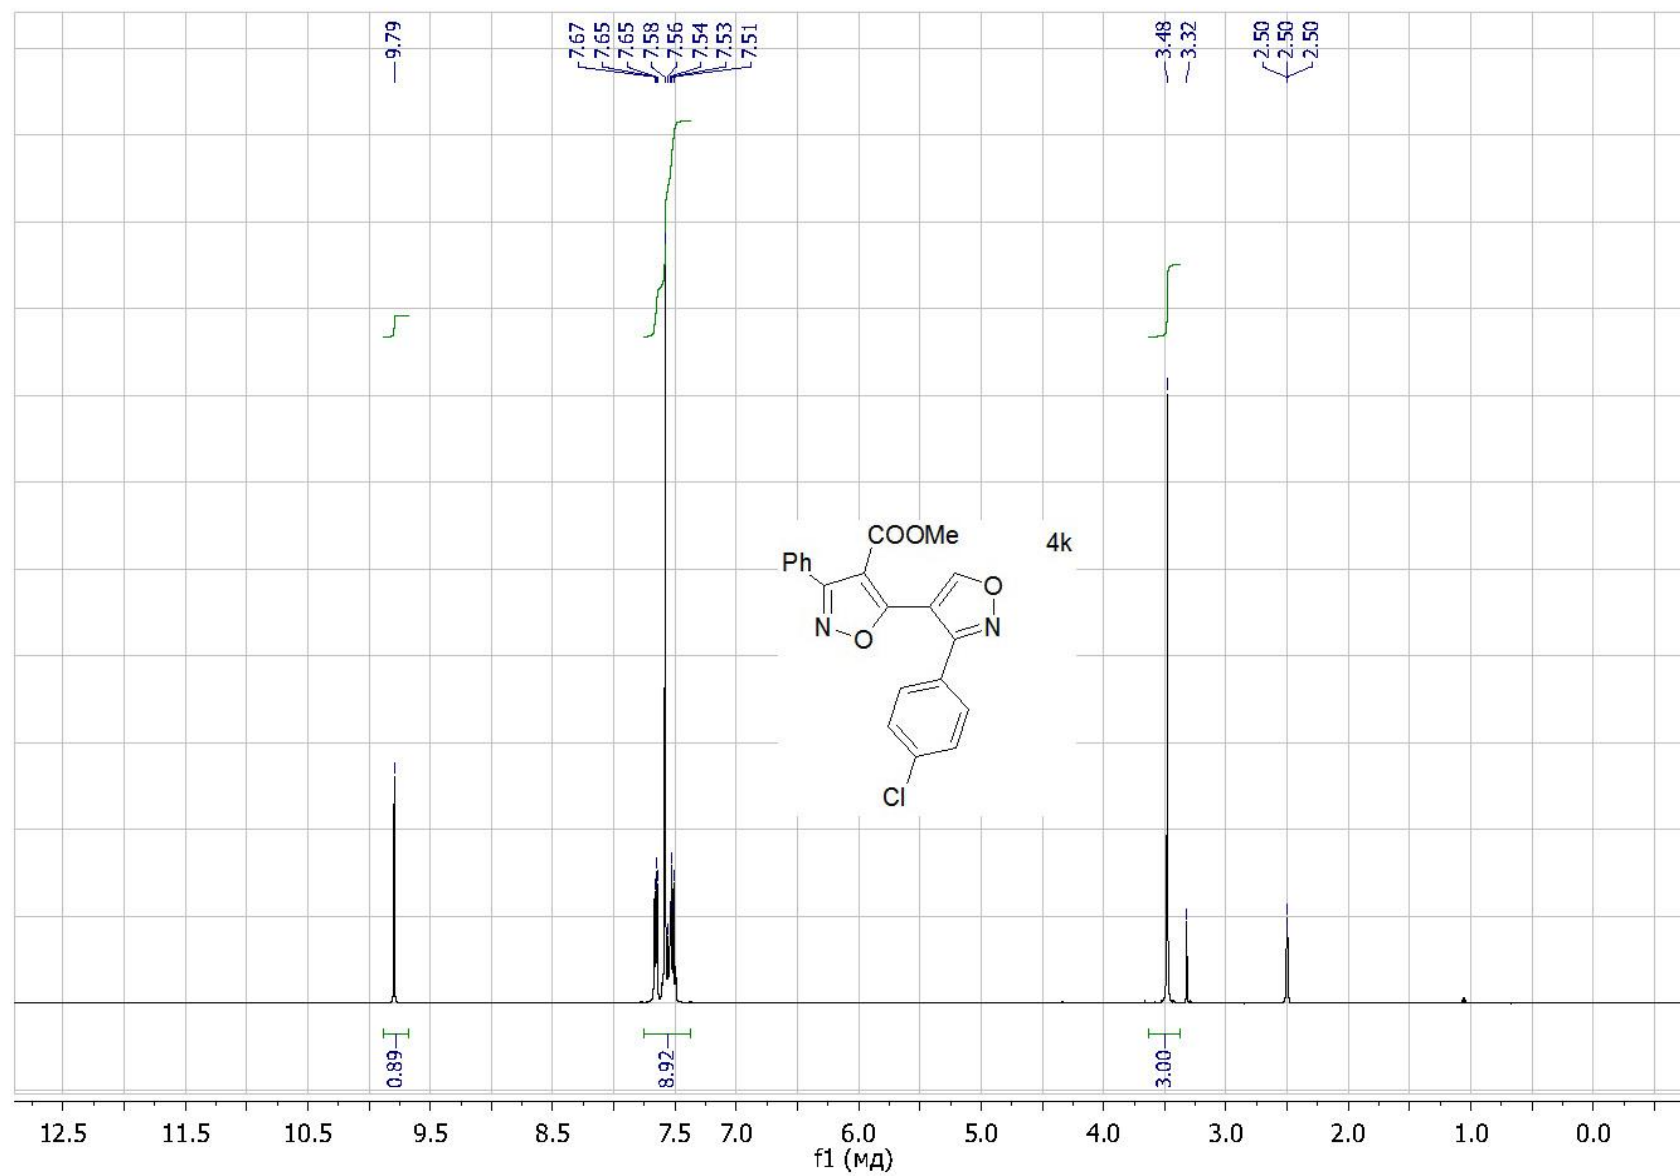

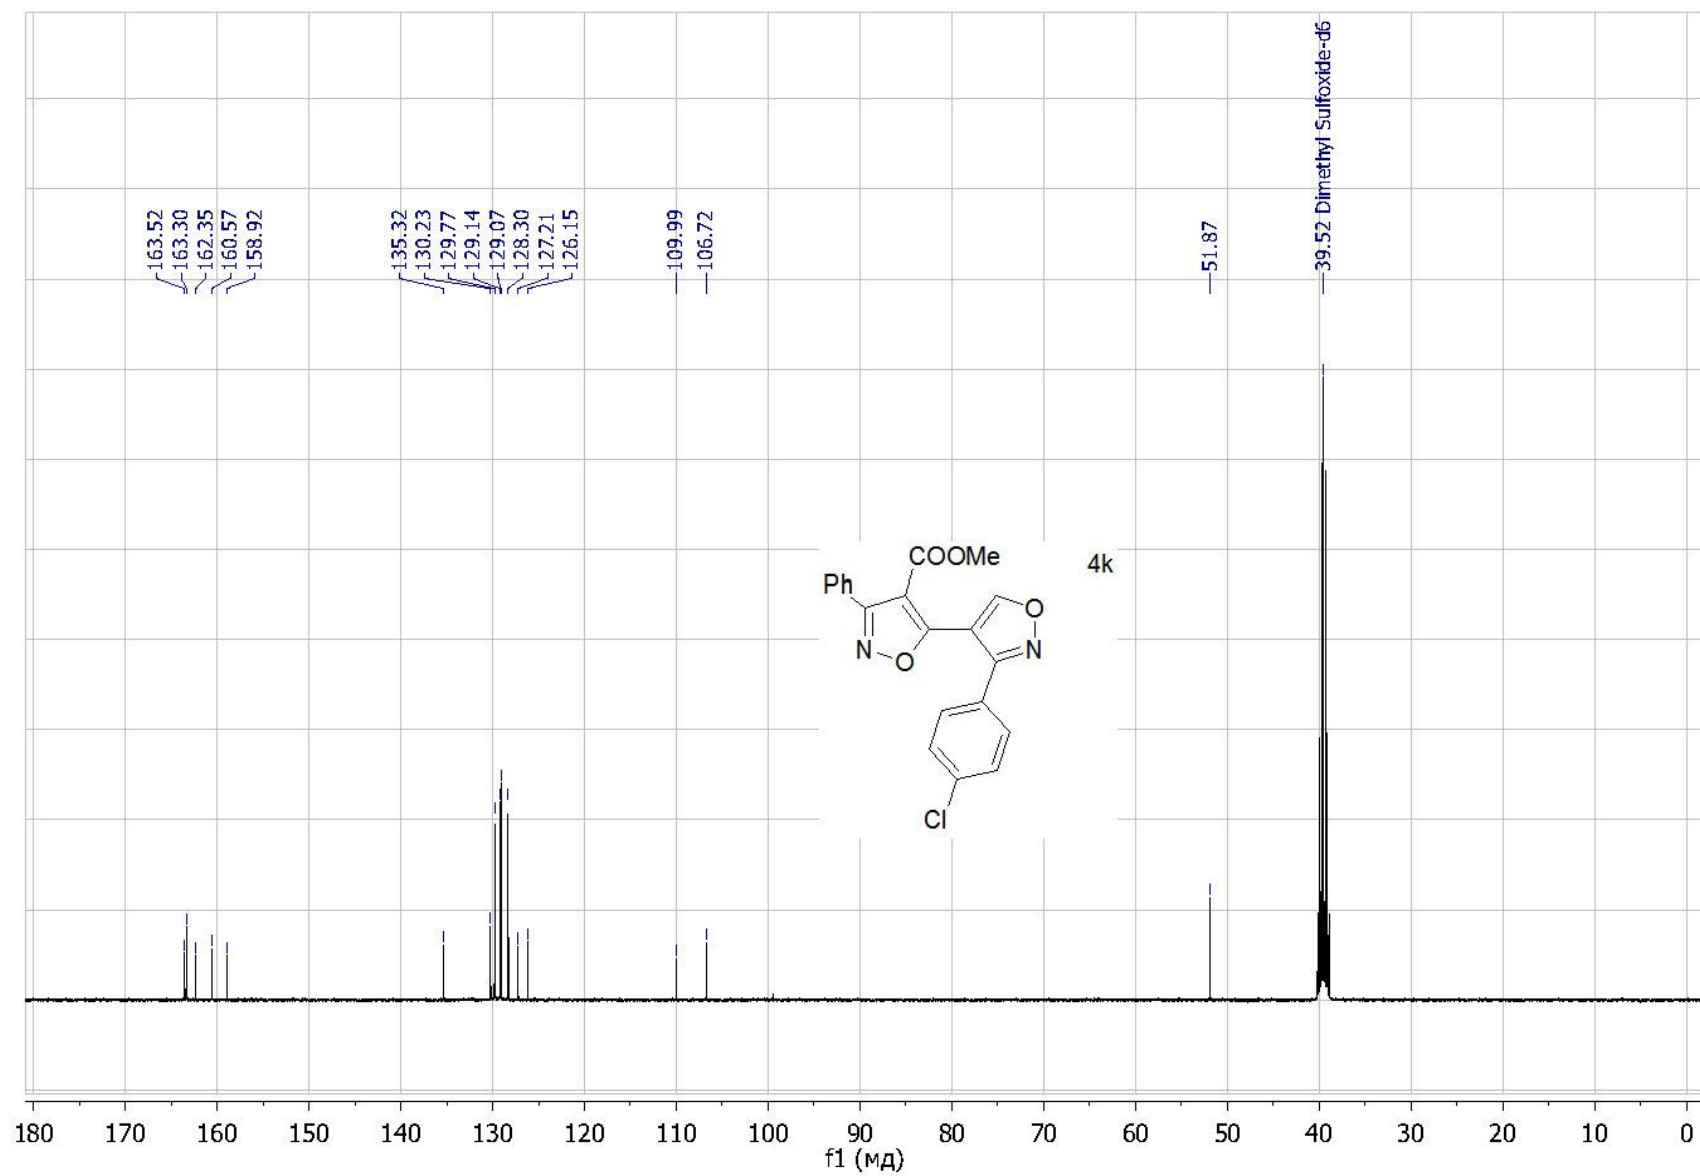

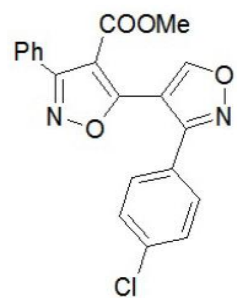

4k

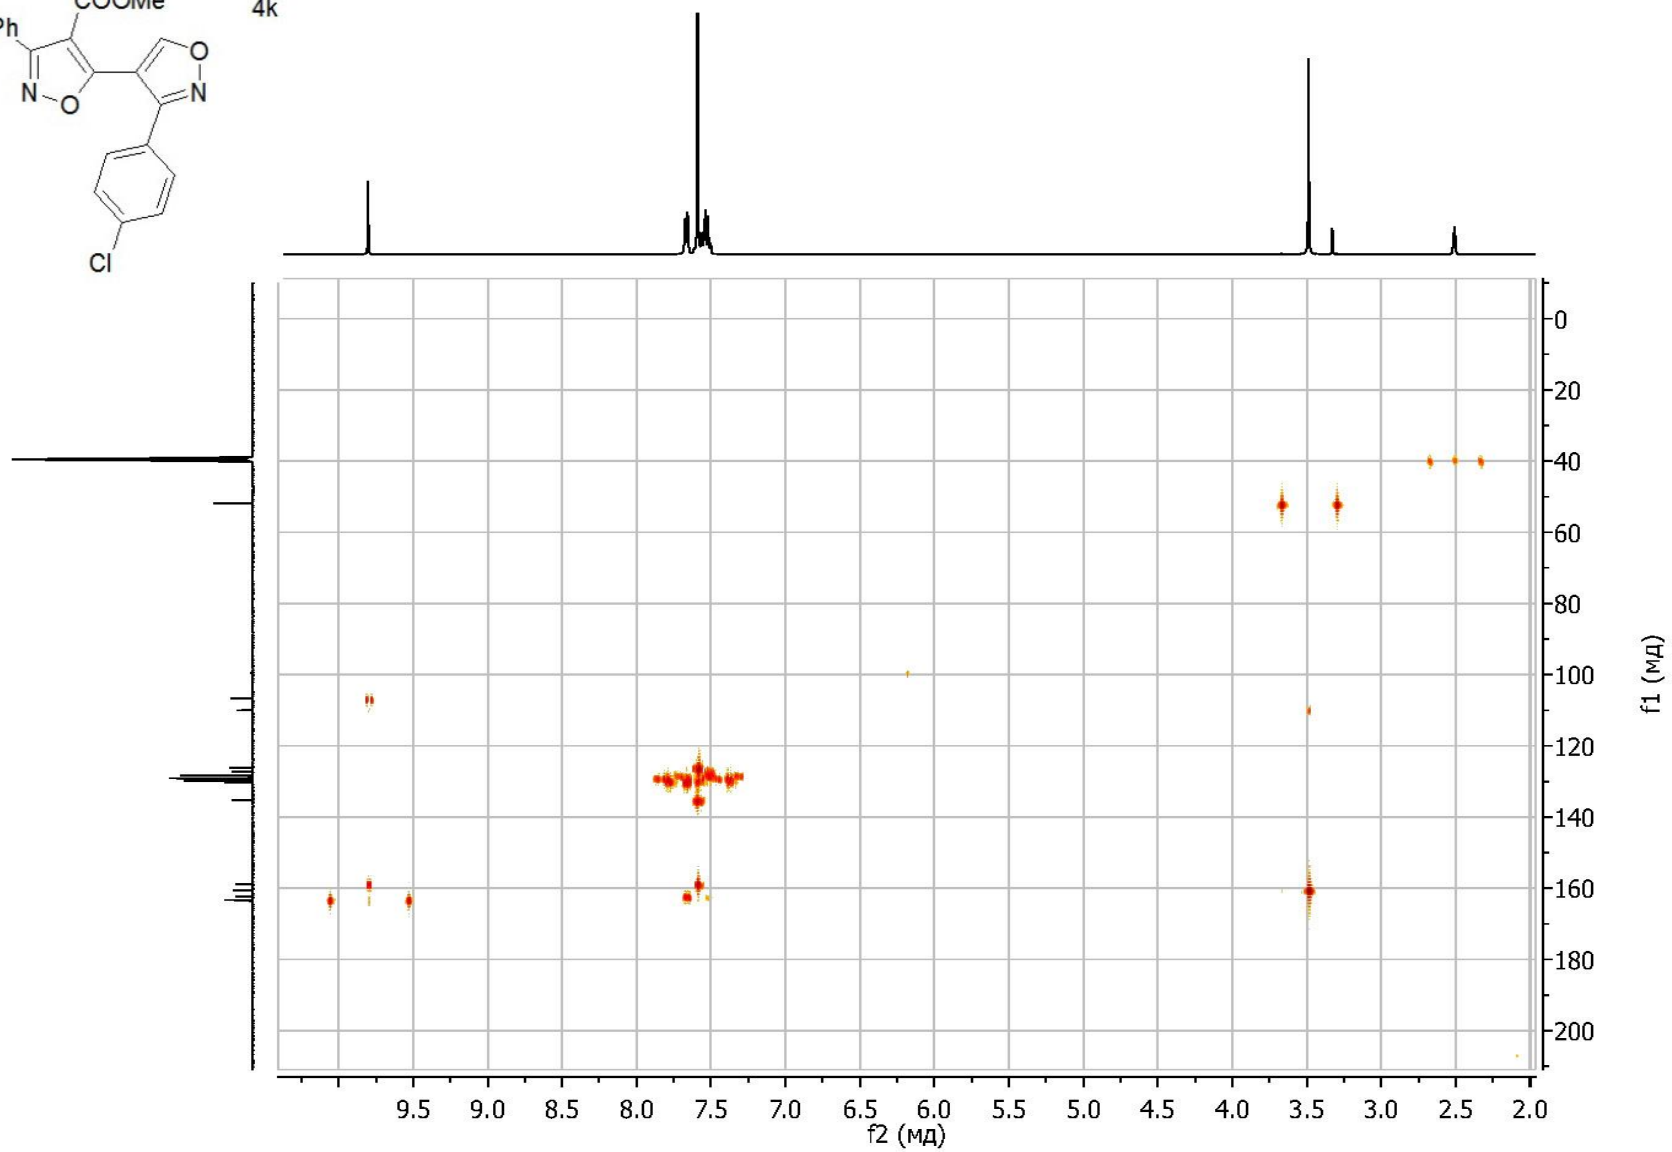

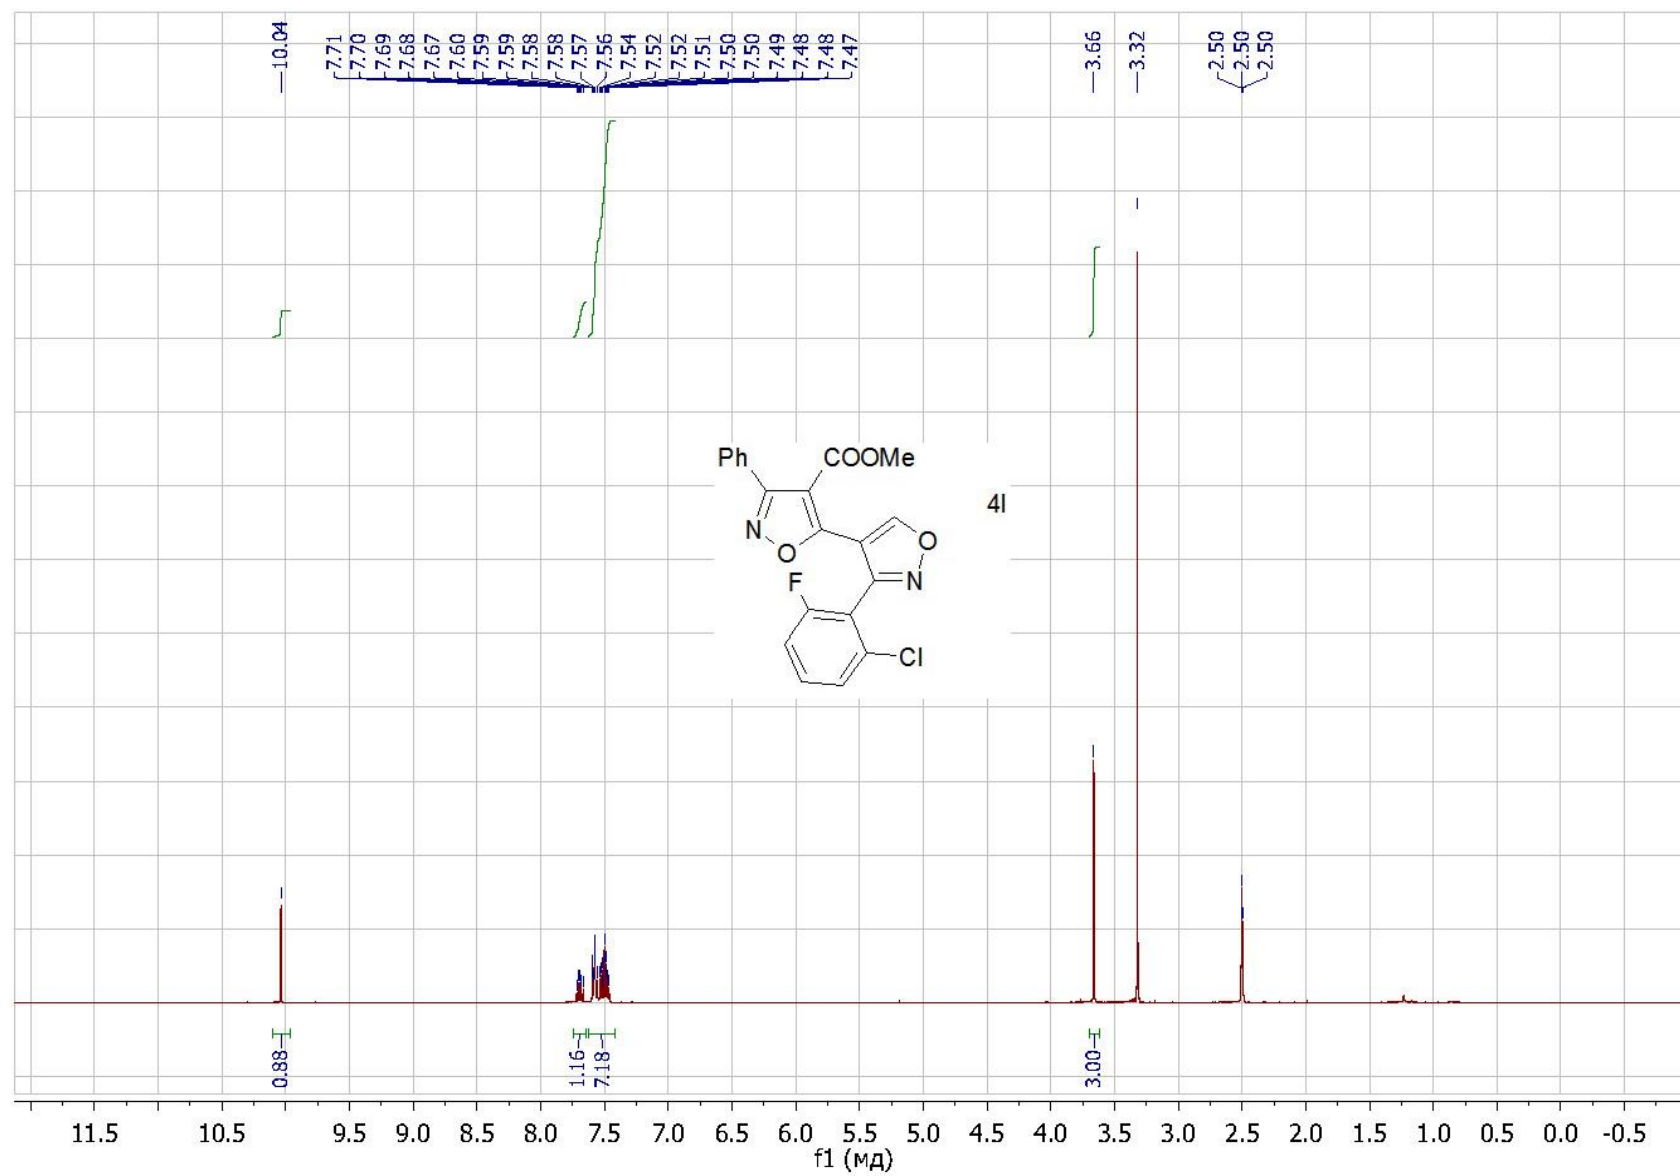

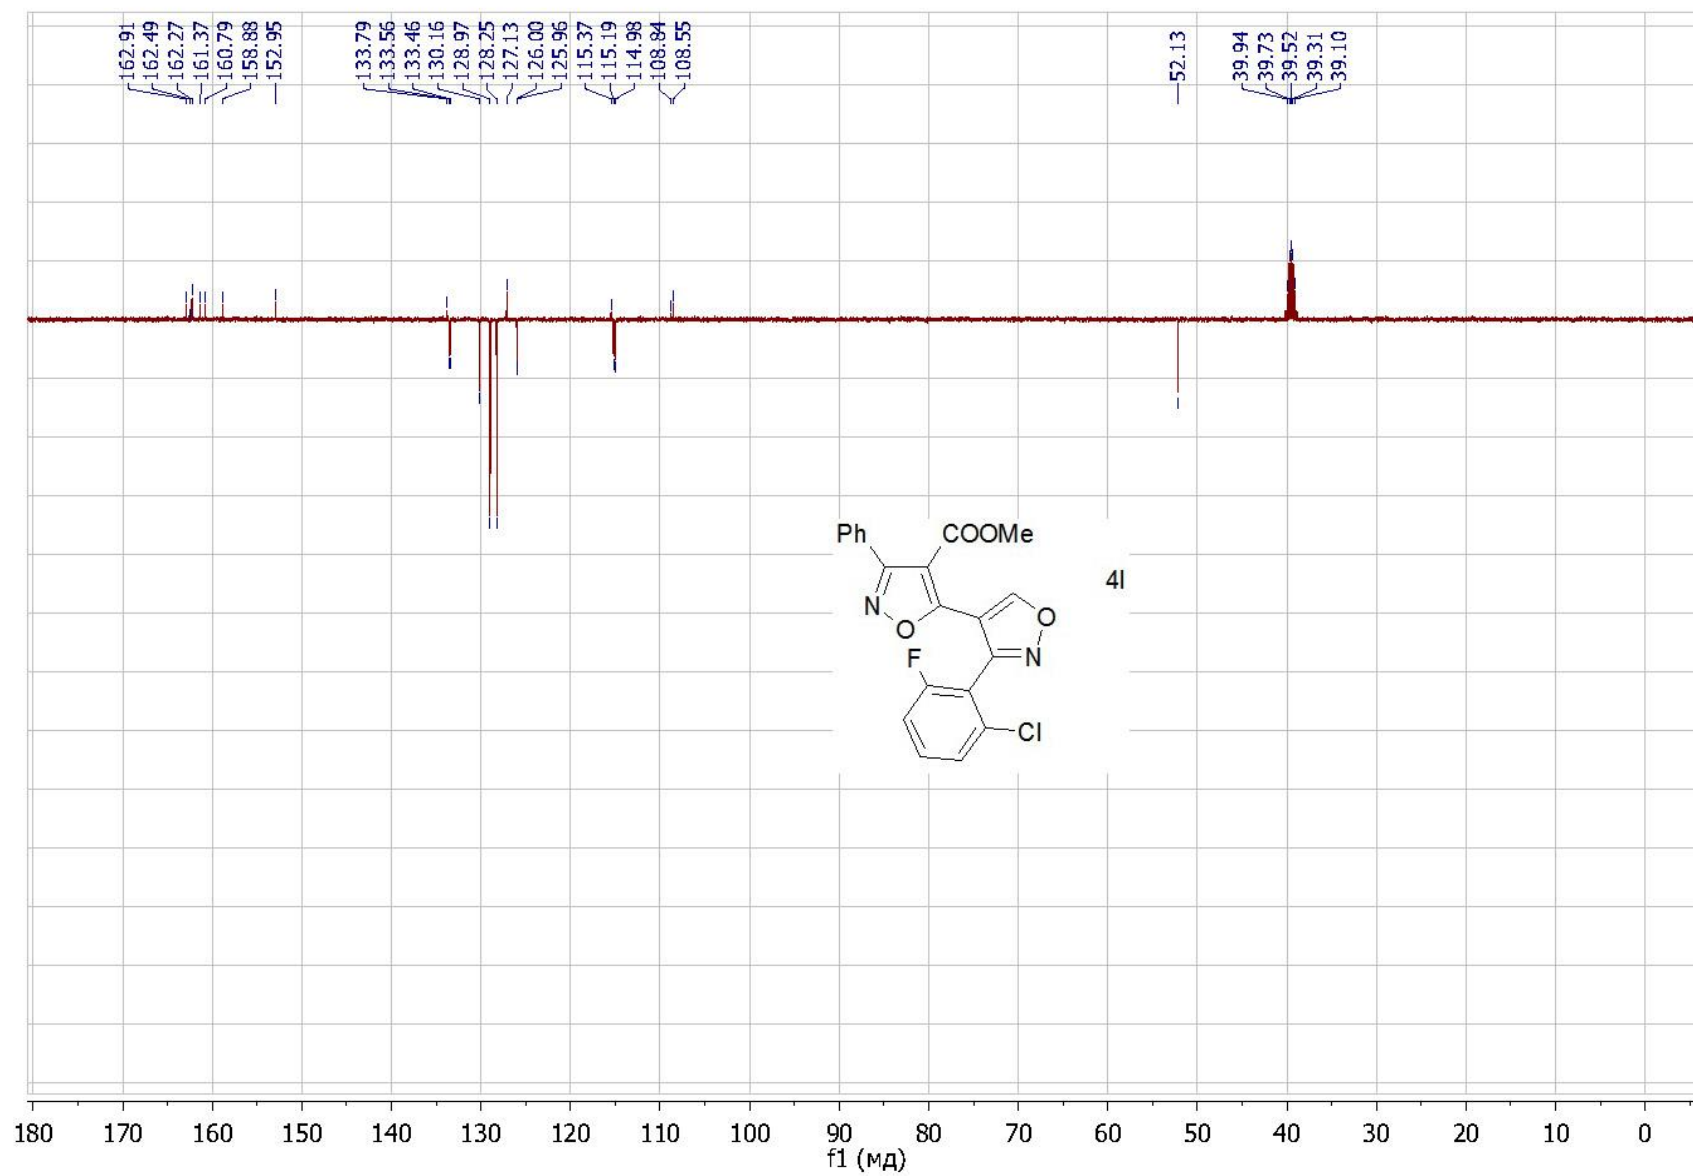

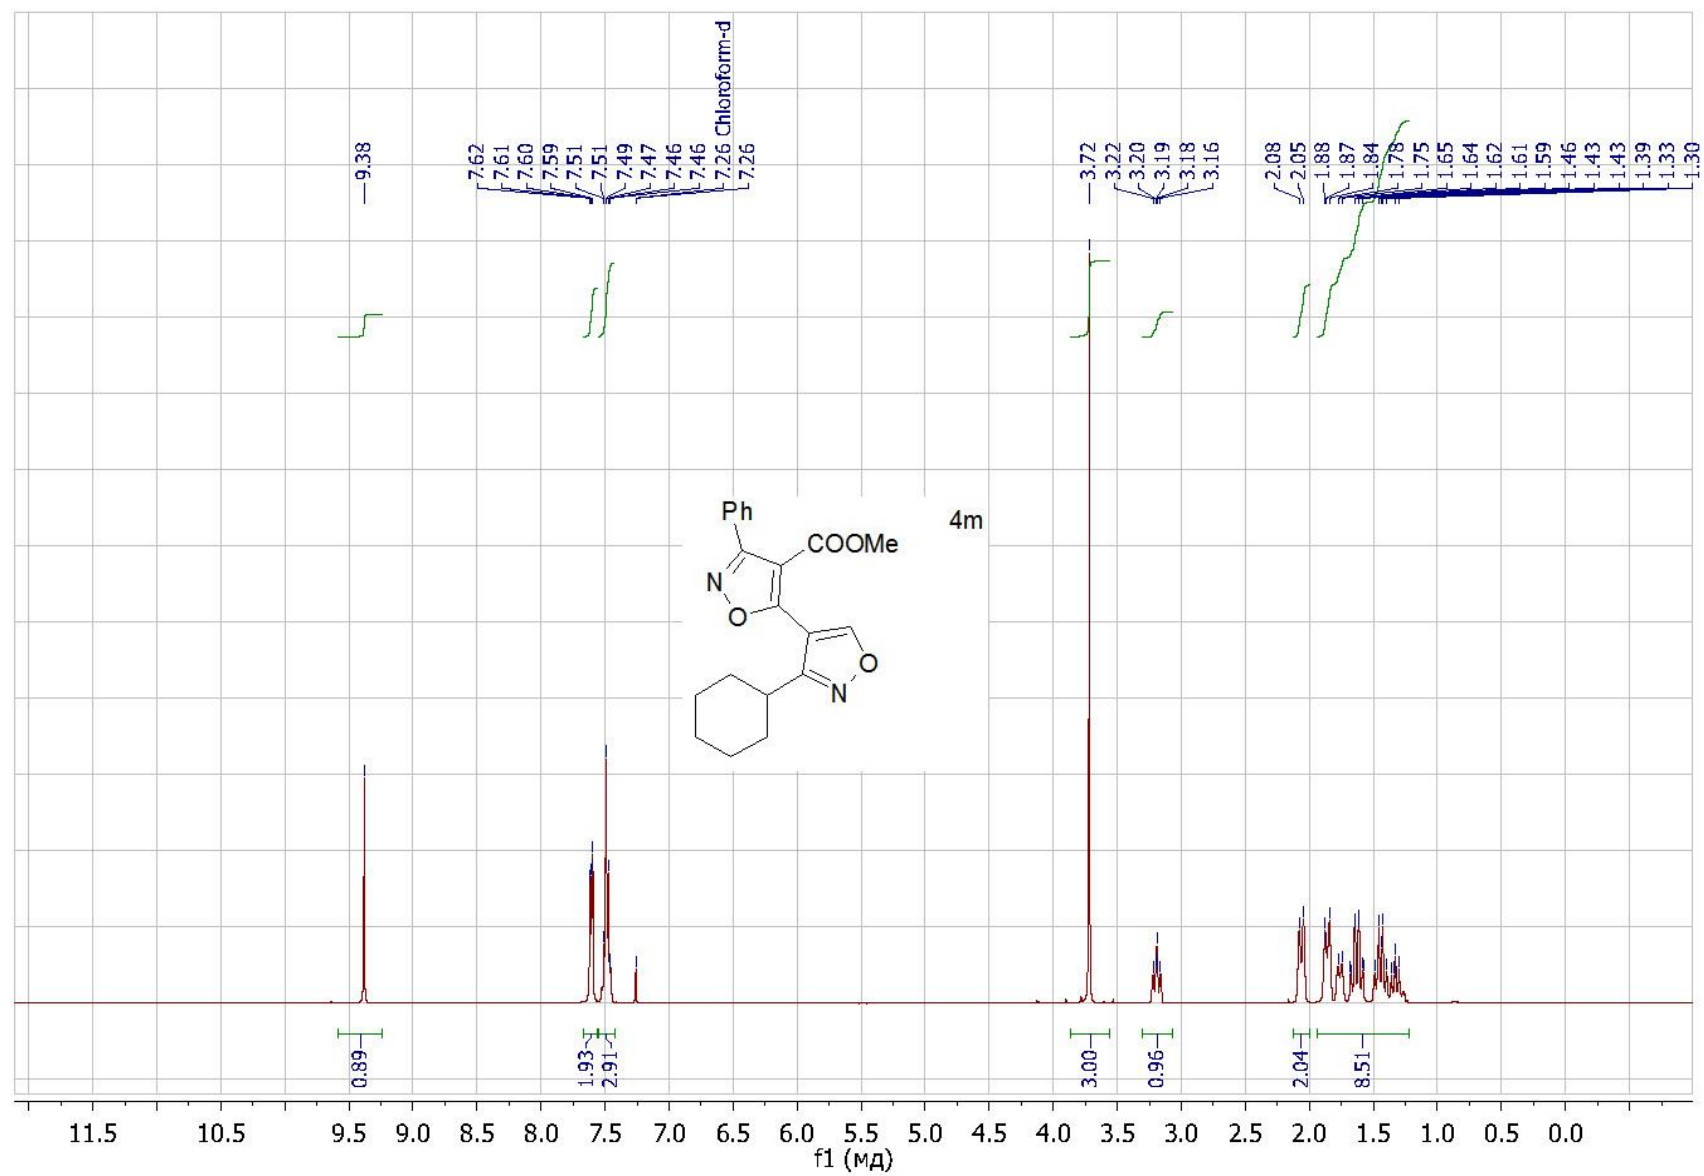

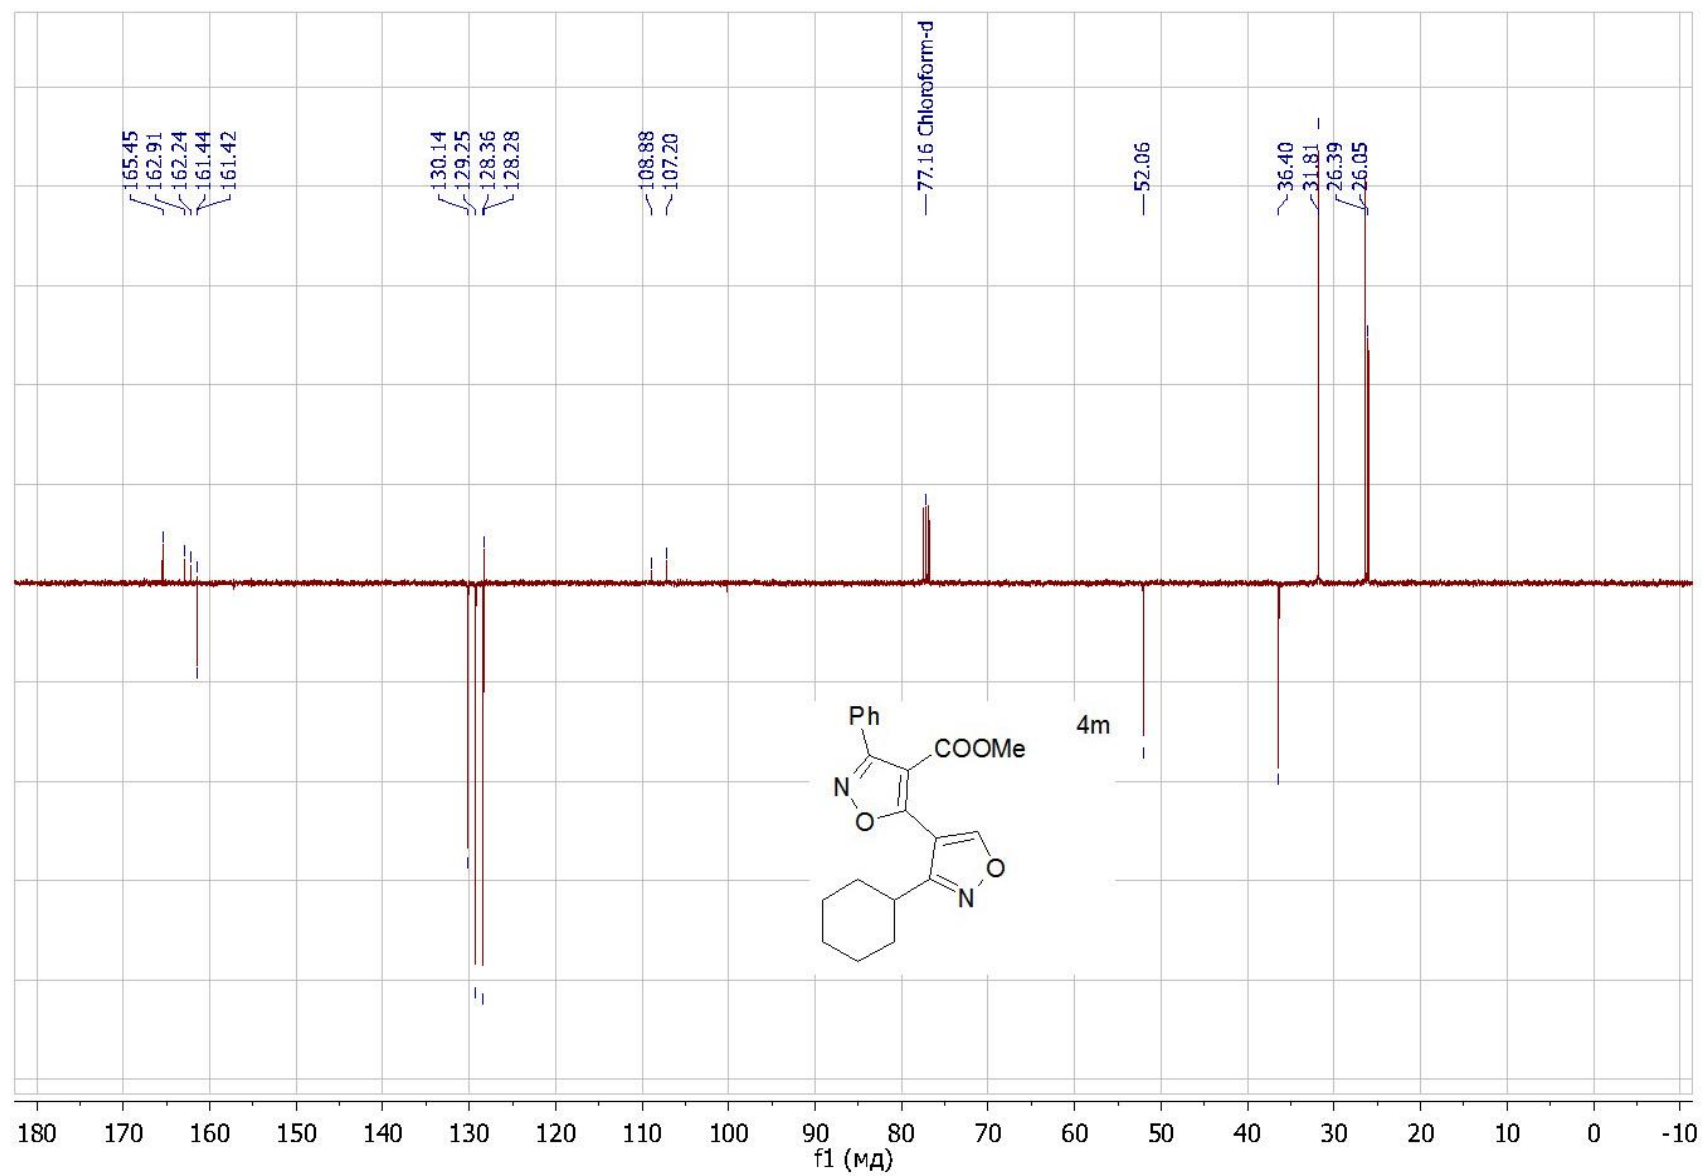

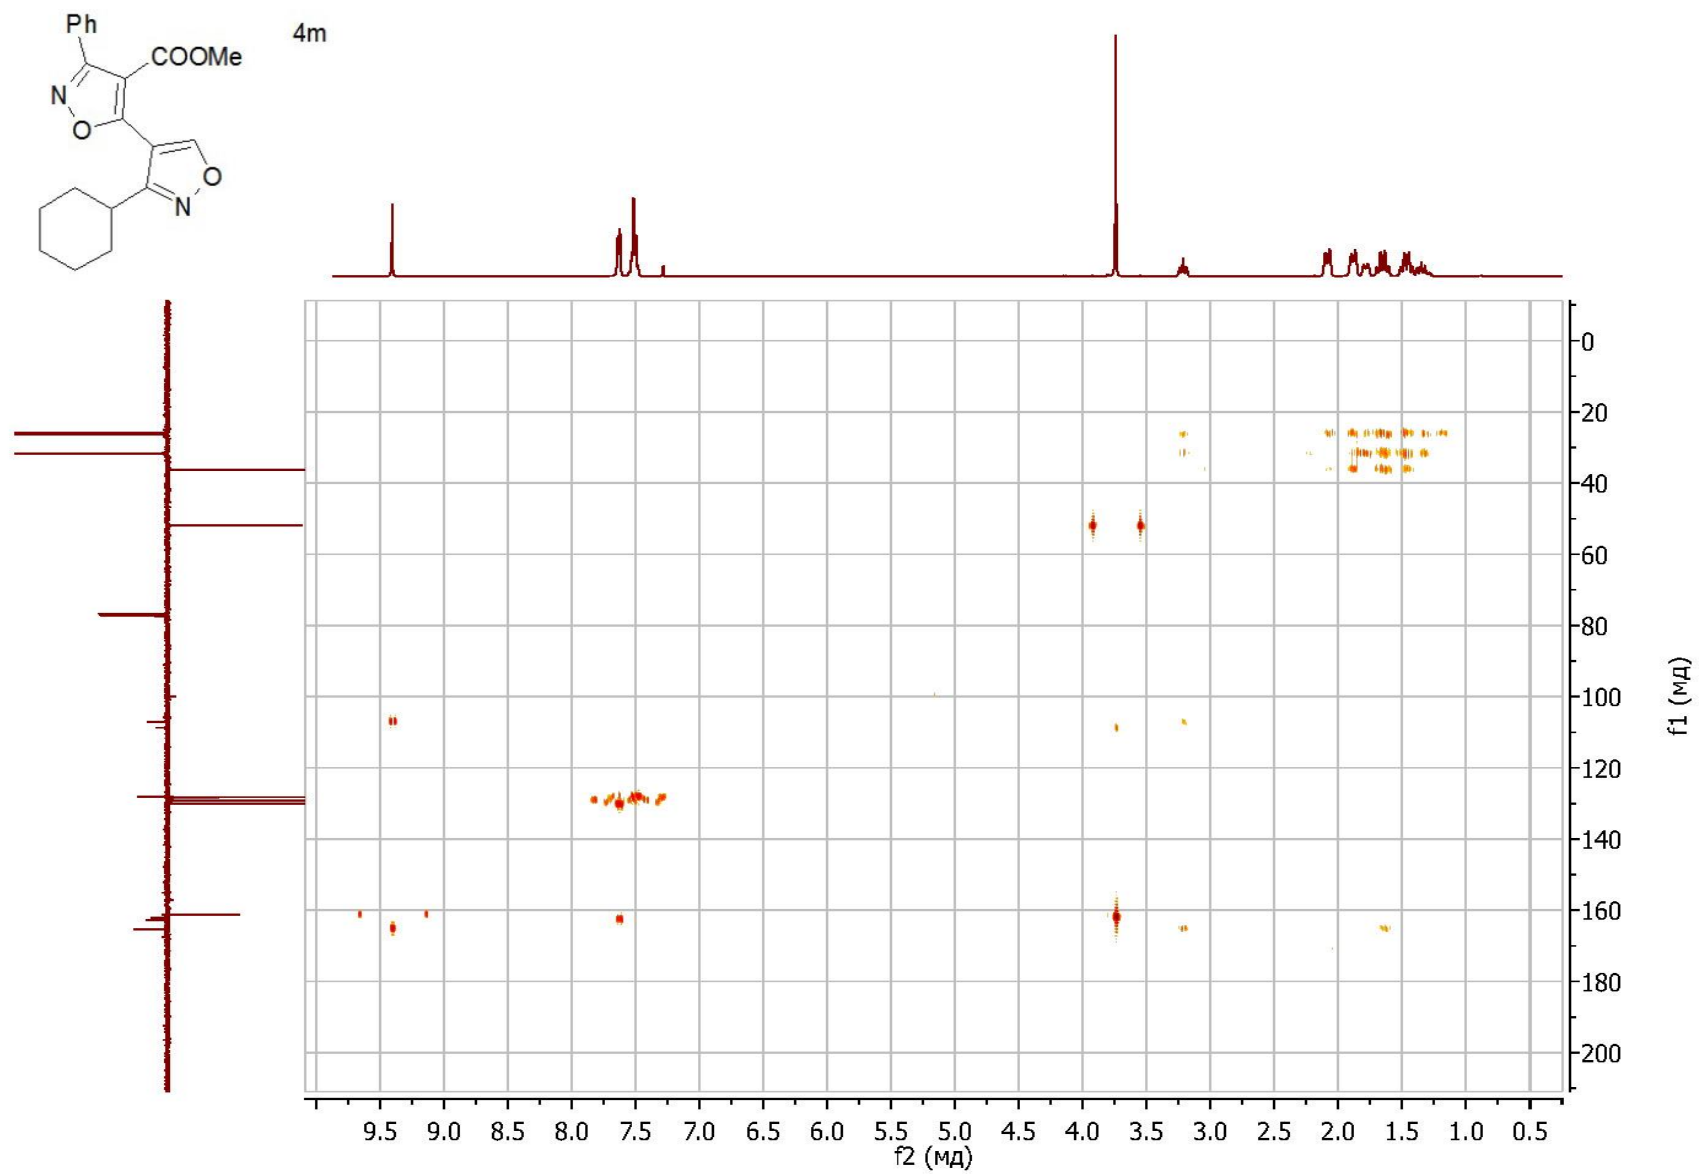

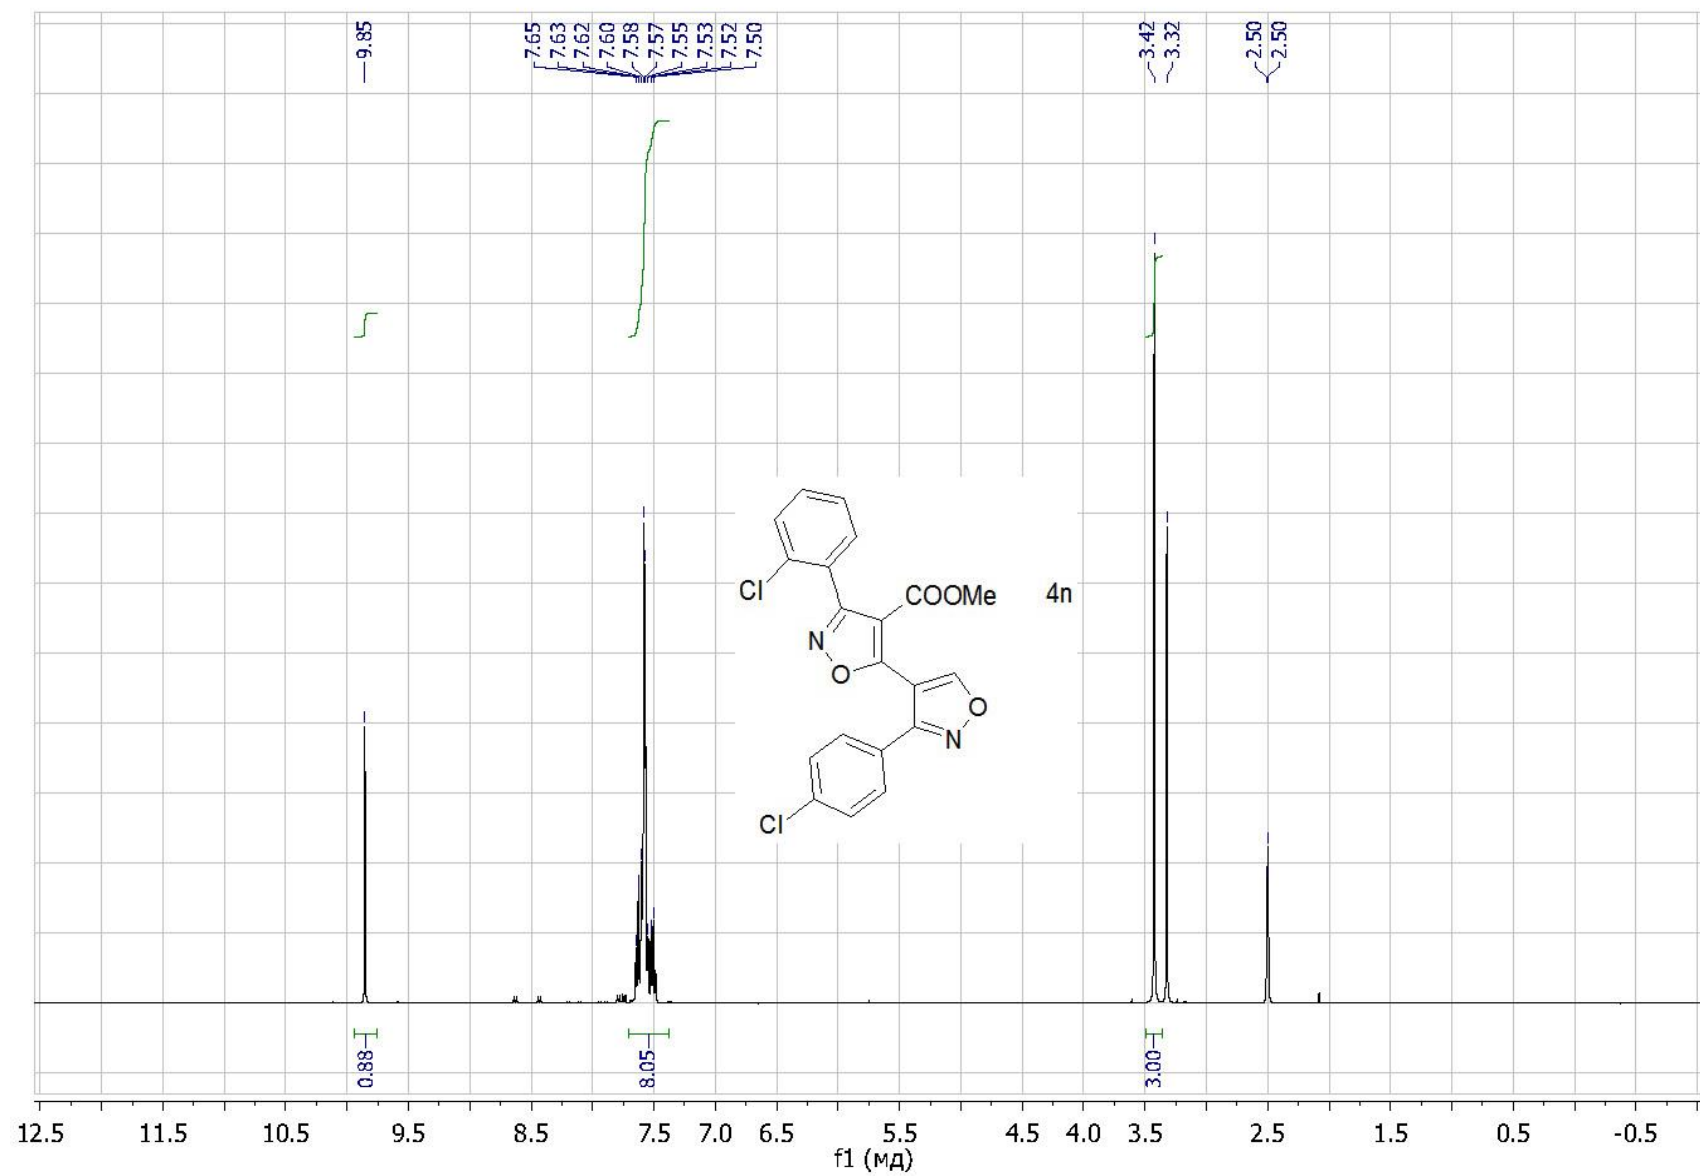

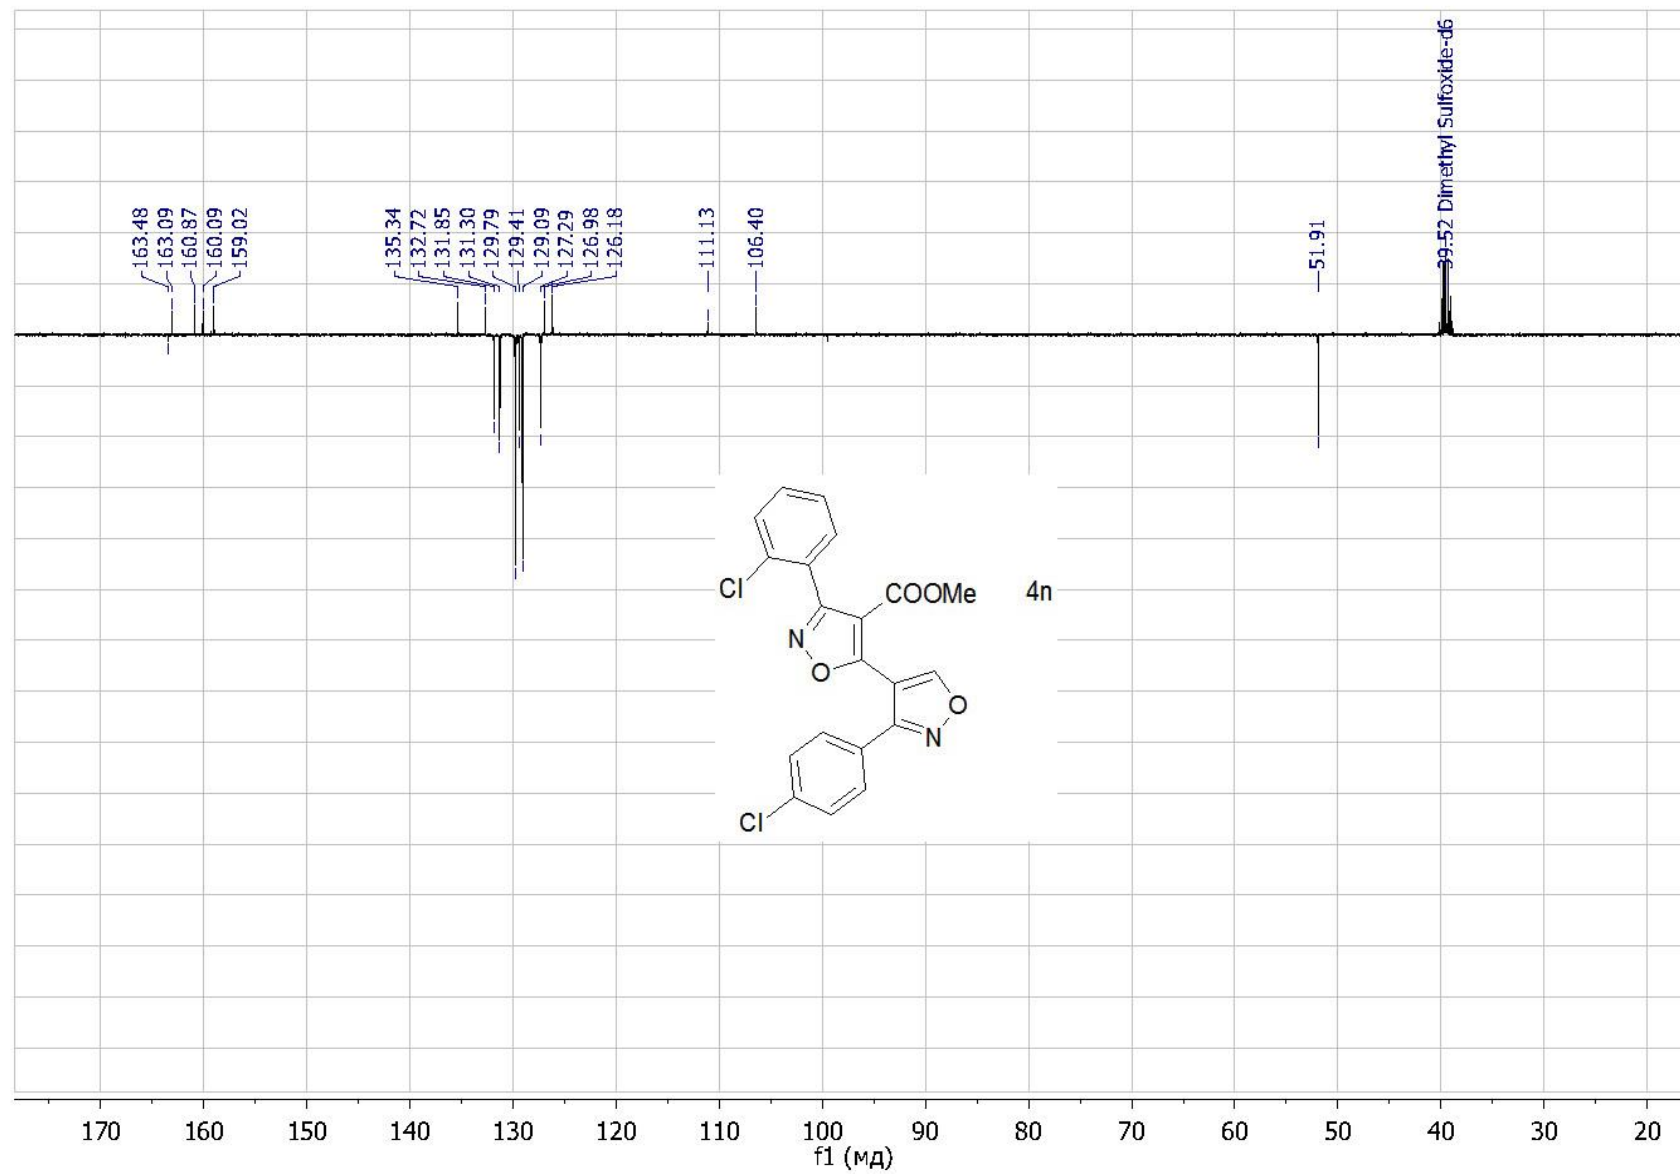

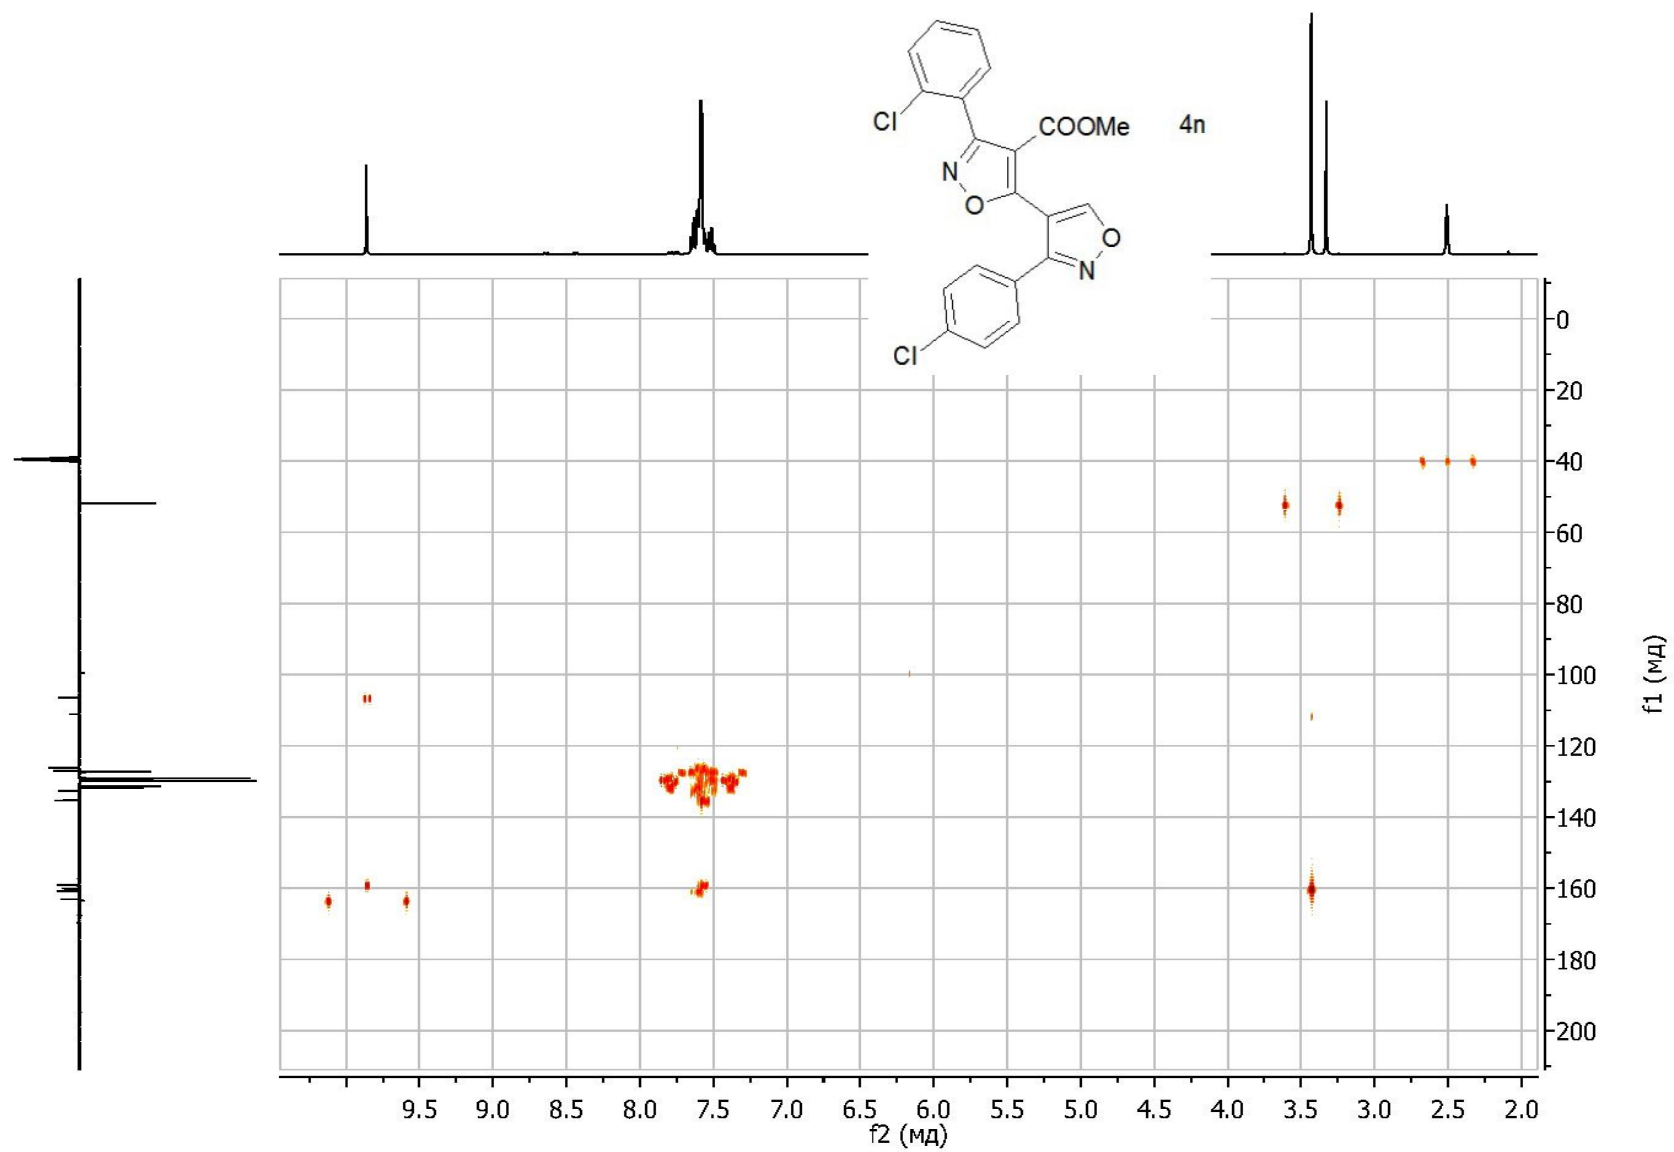

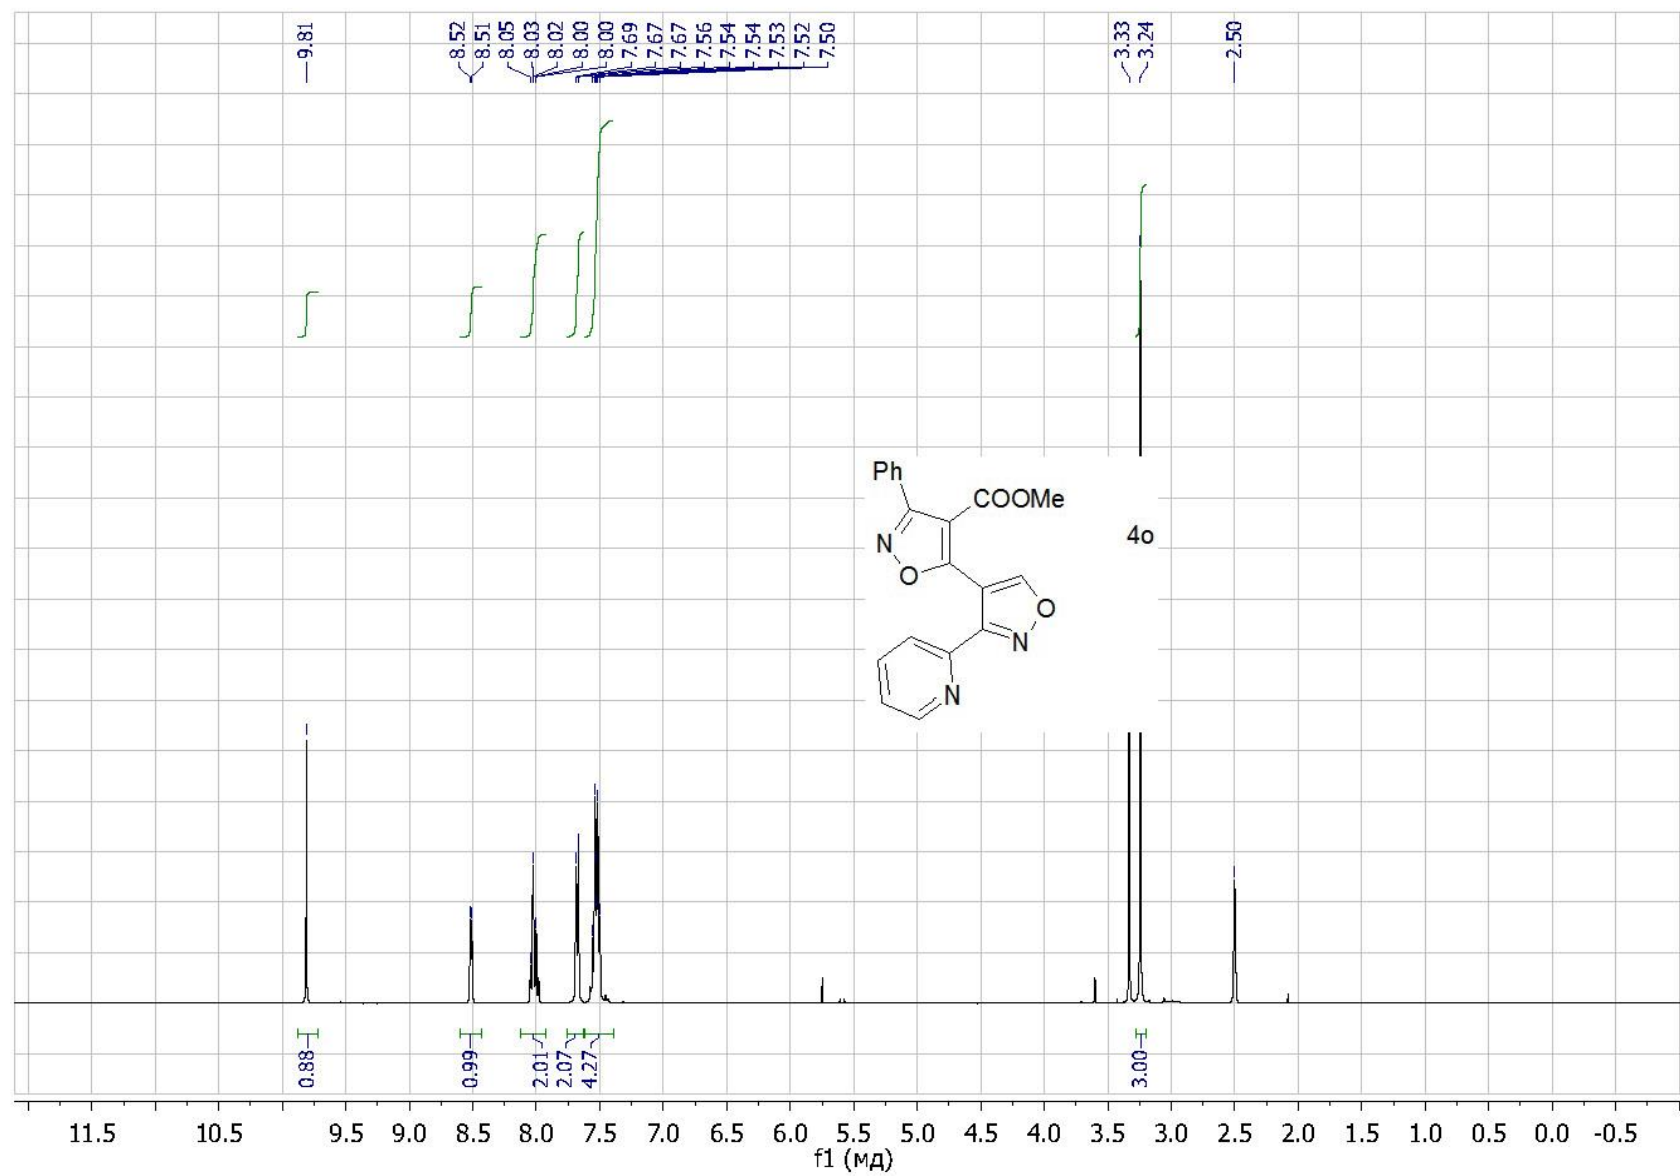

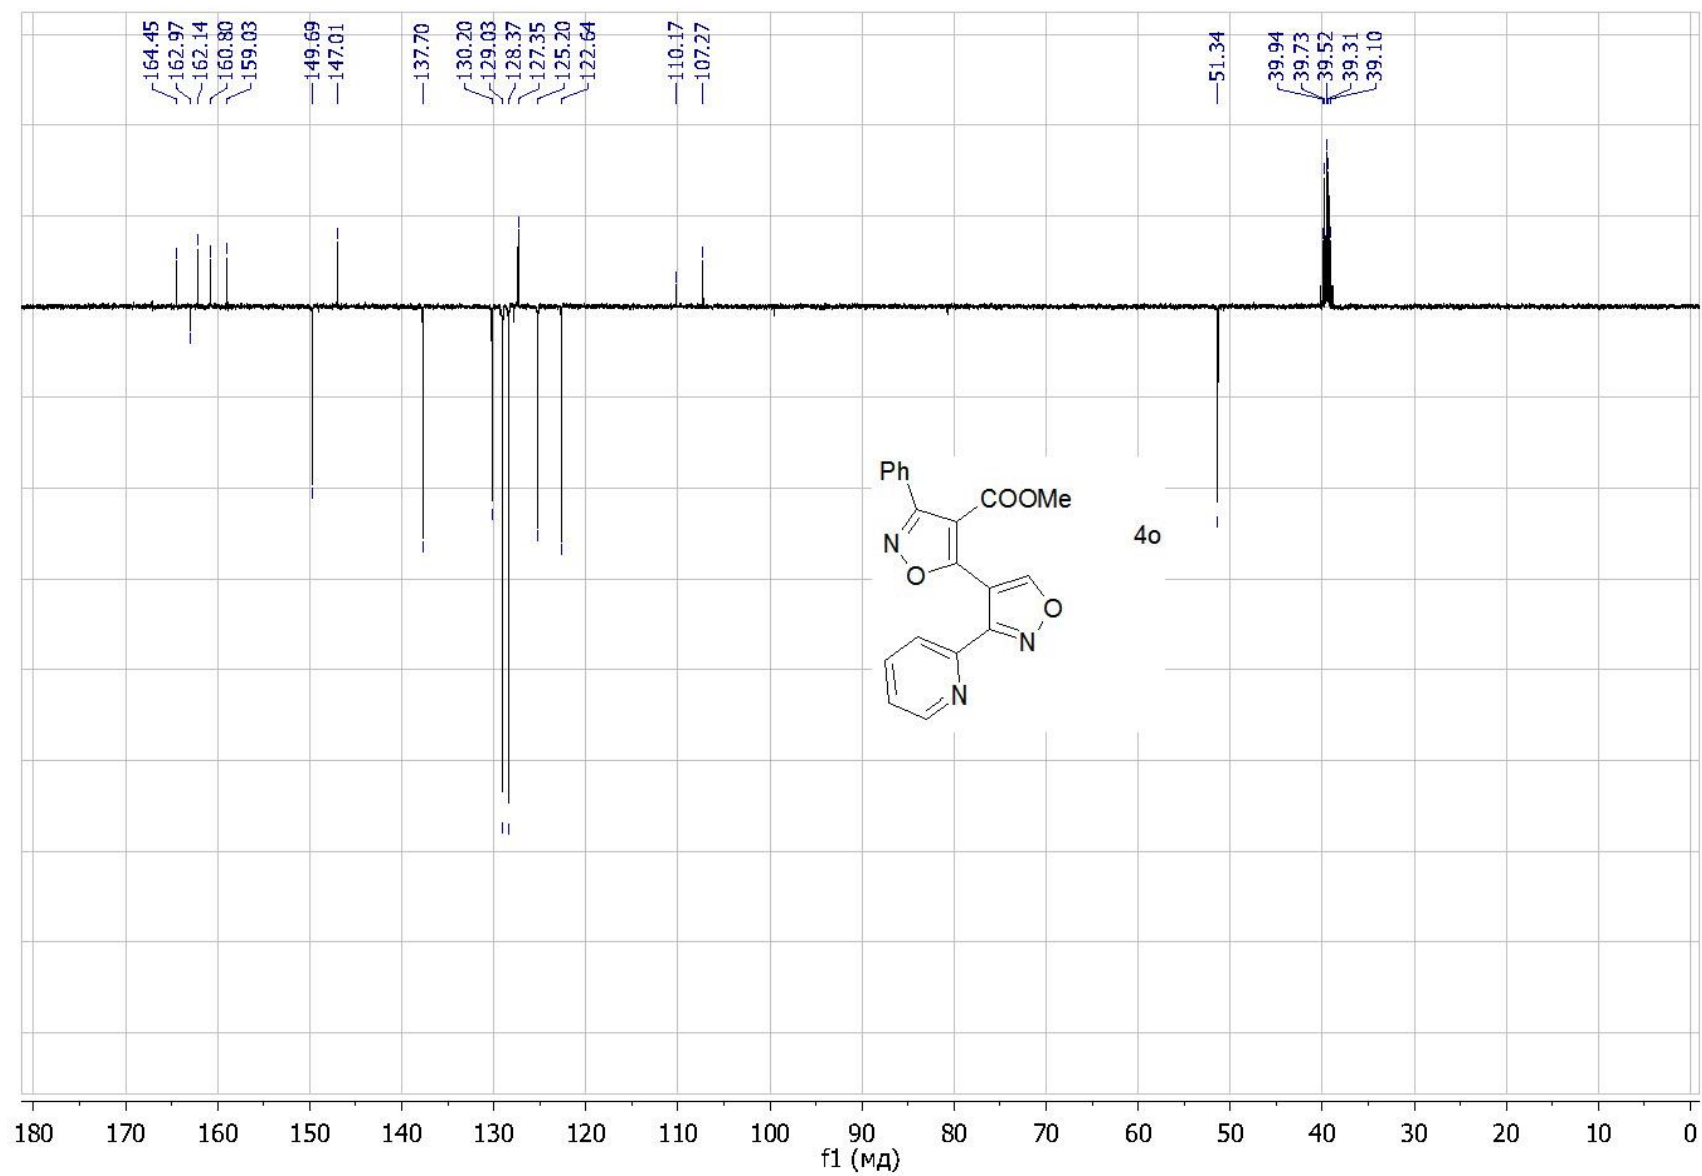

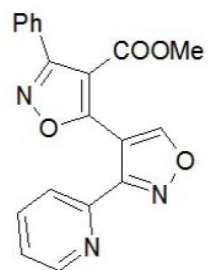

4o

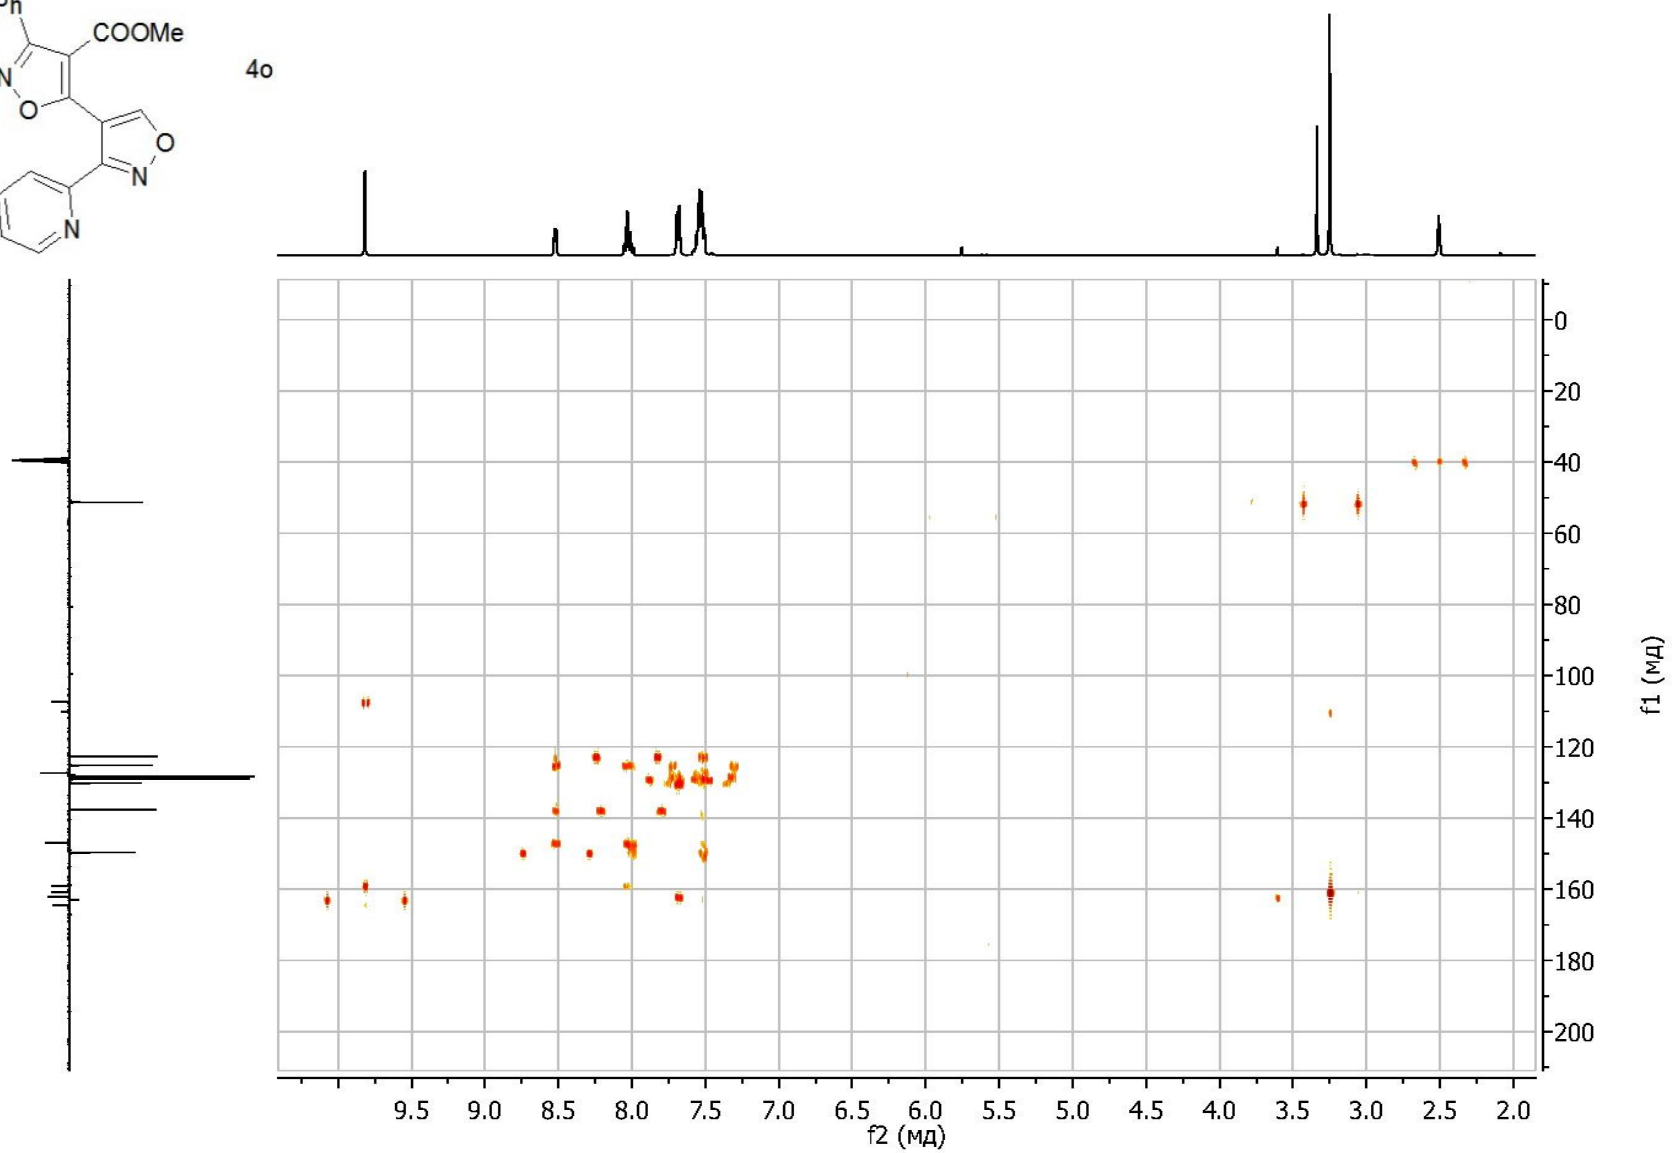

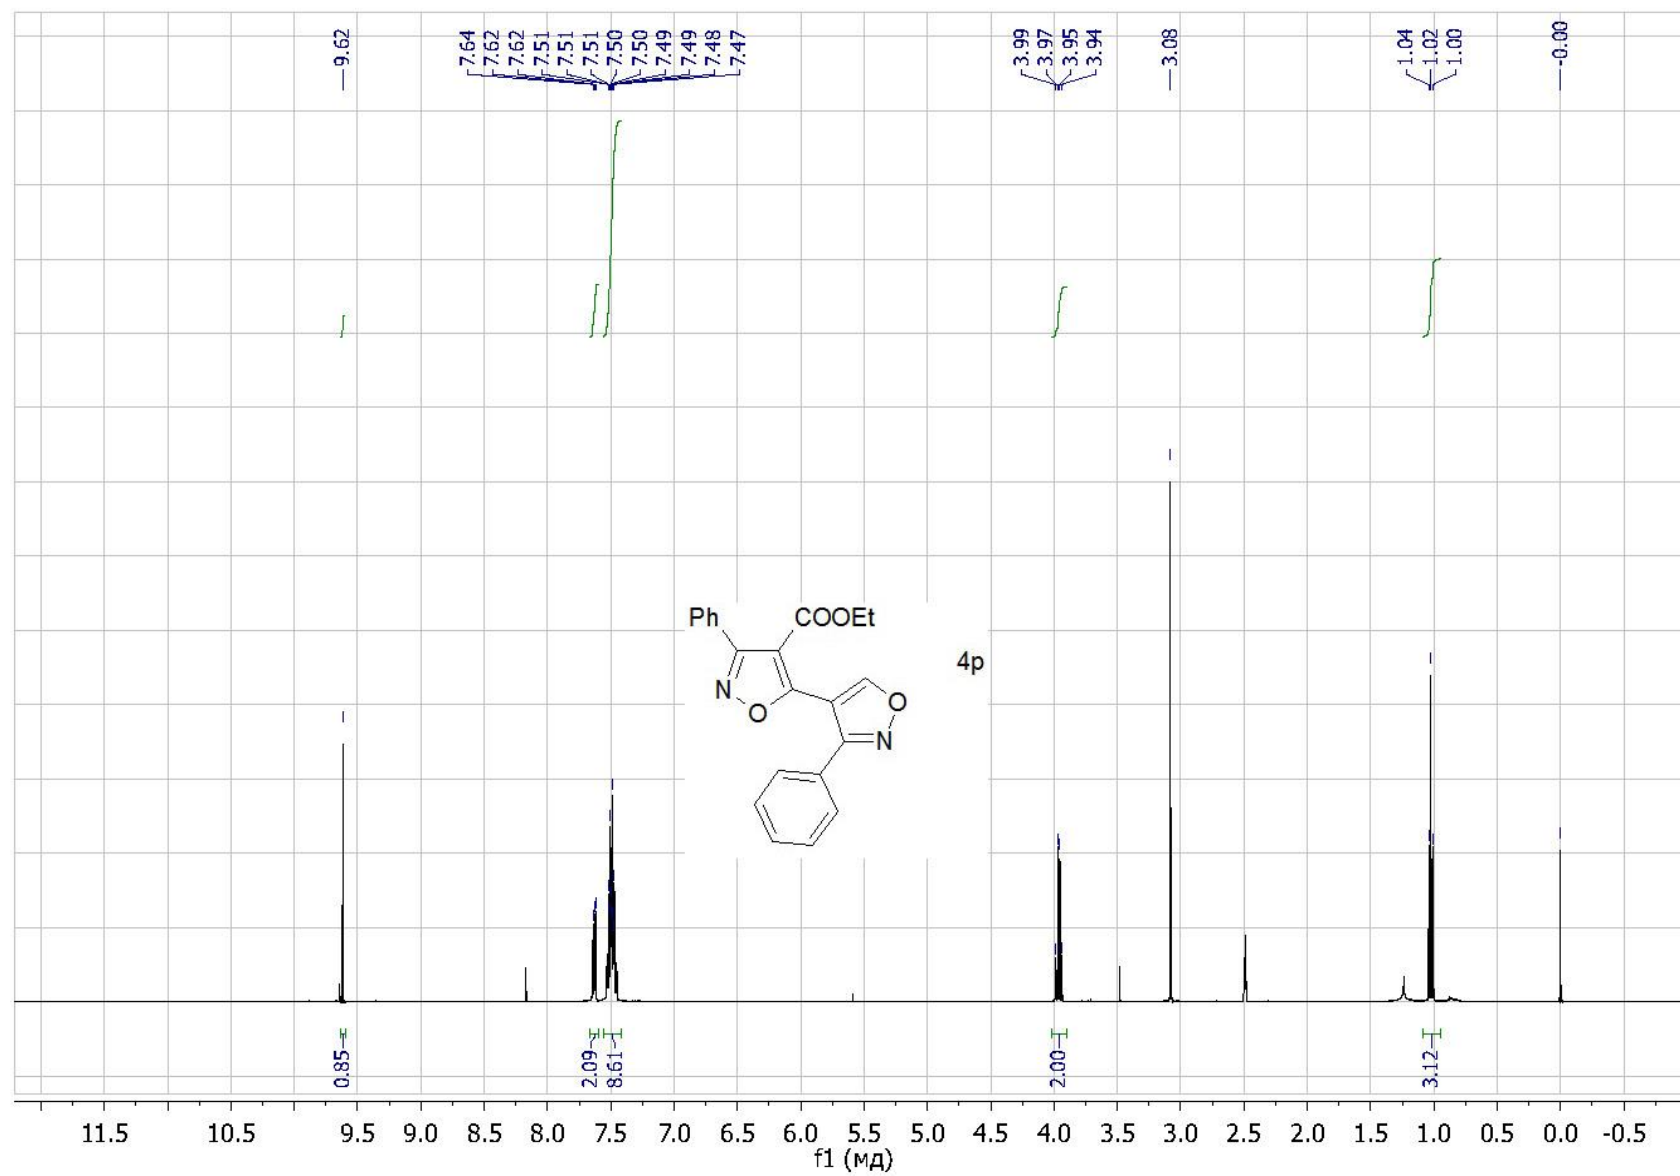

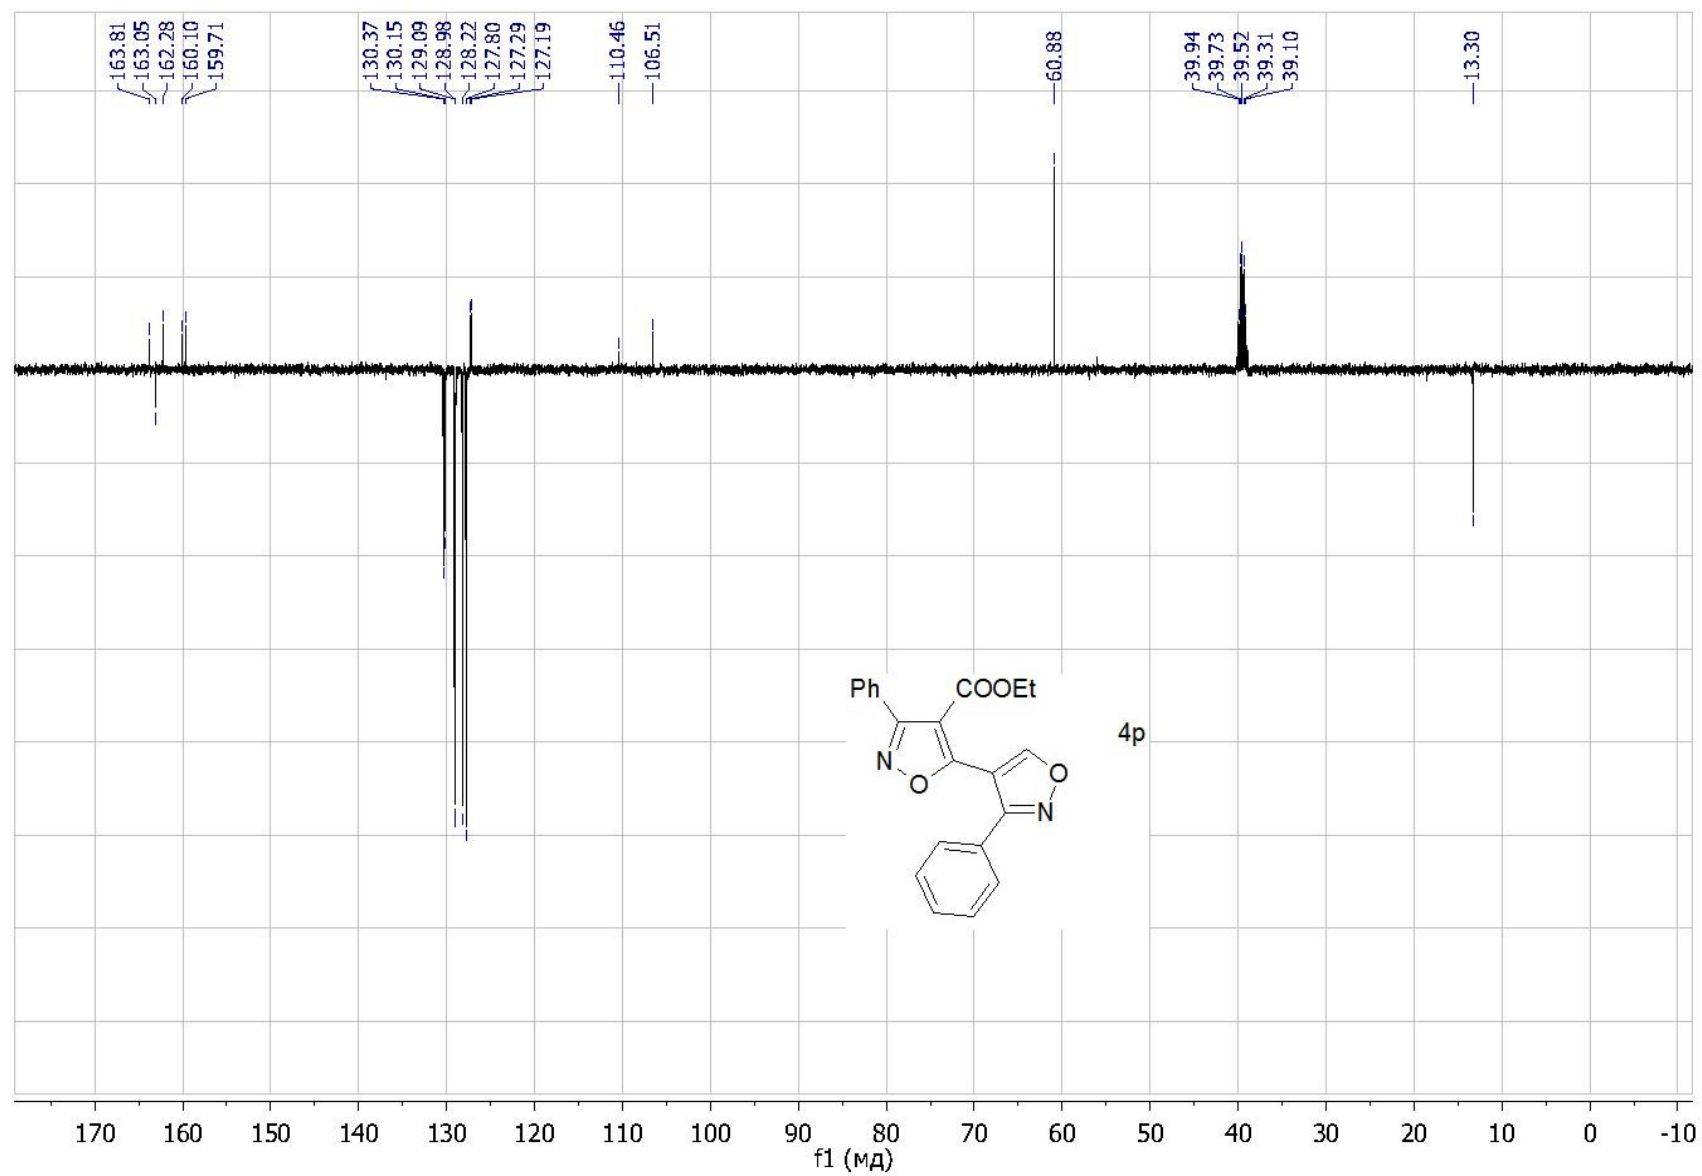

Supplement: Additional file 2 [file 1860-5397-12-233-S2.pdf]
